# Supplementary material for: Two Centuries of Oceanographic Data in the Indonesian Seas and Surroundings: Historical Trends, Gaps, and Future Challenges
Source: Copernicus journal article supplement (doi:10.5194/essd-2025-196), 2025-05-16
Supplement: Supplementary file 1 [file essd-2025-196-supplement.zip]

## Sheet: Data TRIUMPH dll_Semicolon
No	Year	Collaborator	Name of Project	Sampling Method	Name of Station	Latitude	Longitude	Area
1	2007	IMRO MoMAF - FIO - UMD	SITE (The South China Sea – Indonesian Seas Transport/Exchange)	TRBM (Trawl Resistance Bottom Mounted)	A1	-1.71192	106.743	Karimata Strait
2	2007	IMRO MoMAF - FIO - UMD	SITE (The South China Sea – Indonesian Seas Transport/Exchange)	TRBM (Trawl Resistance Bottom Mounted)	A2	-1.0924	107.986	Karimata Strait
3	2008	IMRO MoMAF - FIO - UMD	SITE (The South China Sea – Indonesian Seas Transport/Exchange)	TRBM (Trawl Resistance Bottom Mounted)	A1	-1.71192	106.743	Karimata Strait
4	2008	IMRO MoMAF - FIO - UMD	SITE (The South China Sea – Indonesian Seas Transport/Exchange)	TRBM (Trawl Resistance Bottom Mounted)	A2	-1.0924	107.986	Karimata Strait
5	2008	IMRO MoMAF - FIO - UMD	SITE (The South China Sea – Indonesian Seas Transport/Exchange)	TRBM (Trawl Resistance Bottom Mounted)	A1 New	-1.66653	106.834	Karimata Strait
6	2008	IMRO MoMAF - FIO - UMD	SITE (The South China Sea – Indonesian Seas Transport/Exchange)	TRBM (Trawl Resistance Bottom Mounted)	B2	-2.28325	108.25	Karimata Strait
7	2008	IMRO MoMAF - FIO - UMD	SITE (The South China Sea – Indonesian Seas Transport/Exchange)	TRBM (Trawl Resistance Bottom Mounted)	B3	-1.917	108.55	Karimata Strait
8	2008	IMRO MoMAF - FIO - UMD	SITE (The South China Sea – Indonesian Seas Transport/Exchange)	TRBM (Trawl Resistance Bottom Mounted)	B1	-2.78142	107.159	Bangka Belitung
9	2008	IMRO MoMAF - FIO - UMD	SITE (The South China Sea – Indonesian Seas Transport/Exchange)	TRBM (Trawl Resistance Bottom Mounted)	B4	-2.87	107.258	Bangka Belitung
10	2008	IMRO MoMAF - FIO	JUVO (Java Upwelling Variation Observation)	Sub-Surface Mooring	JUV_01	-8.5	106.75	South of Java
11	2008	IMRO MoMAF - FIO	JUVO (Java Upwelling Variation Observation)	Sub-Surface Mooring	JUV_02	-8.53397	106.757	South of Java
12	2009	IMRO MoMAF - FIO - UMD	SITE (The South China Sea – Indonesian Seas Transport/Exchange)	TRBM (Trawl Resistance Bottom Mounted)	S1	-6.01297	105.901	Sunda Strait
13	2009	IMRO MoMAF - FIO - UMD	SITE (The South China Sea – Indonesian Seas Transport/Exchange)	TRBM (Trawl Resistance Bottom Mounted)	S2	-5.93697	105.792	Sunda Strait
14	2009	IMRO MoMAF - FIO - UMD	SITE (The South China Sea – Indonesian Seas Transport/Exchange)	TRBM (Trawl Resistance Bottom Mounted)	B2	-2.28325	108.25	Karimata Strait
15	2009	IMRO MoMAF - FIO - UMD	SITE (The South China Sea – Indonesian Seas Transport/Exchange)	TRBM (Trawl Resistance Bottom Mounted)	B3	-1.917	108.55	Karimata Strait
16	2009	IMRO MoMAF - LDEO CU	MITF (Monitoring Indonesian Through Flow)	Sub-Surface Mooring	MAK	-2.86138	118.465	Makassar Strait
17	2009	IMRO MoMAF - FIO	JUVO (Java Upwelling Variation Observation)	Sub-Surface Mooring	JUV	-8.53397	106.757	South of Java
18	2010	IMRO MoMAF - FIO	JUVO (Java Upwelling Variation Observation)	Surface Mooring	RAMA	-7.98883	100.007	Indian Ocean
19	2010	IMRO MoMAF - FIO	JUVO (Java Upwelling Variation Observation)	Sub-Surface Mooring	JUV	-8.53397	106.757	South of Java
20	2011	IMRO MoMAF - FIO	JUVO (Java Upwelling Variation Observation)	Surface Mooring	RAMA 2011	-7.98883	100.007	Indian Ocean
21	2011	IMRO MoMAF - FIO	JUVO (Java Upwelling Variation Observation)	CTD	Rama01	-7.969	99.9882	Indian Ocean
22	2011	IMRO MoMAF - FIO	JUVO (Java Upwelling Variation Observation)	CTD	Rama02	-7.54467	101.582	Indian Ocean
23	2011	IMRO MoMAF - FIO	JUVO (Java Upwelling Variation Observation)	CTD	Rama02b	-7.27533	102.459	Indian Ocean
24	2011	IMRO MoMAF - FIO	JUVO (Java Upwelling Variation Observation)	CTD	Rama04	-7.02767	103.237	Indian Ocean
25	2011	IMRO MoMAF - FIO	JUVO (Java Upwelling Variation Observation)	CTD	Rama05	-6.84133	103.83	Indian Ocean
26	2011	IMRO MoMAF - FIO	JUVO (Java Upwelling Variation Observation)	CTD	Rama06	-6.73867	104.154	Indian Ocean
27	2011	IMRO MoMAF - FIO	JUVO (Java Upwelling Variation Observation)	CTD	Rama07	-6.61533	104.559	Indian Ocean
28	2011	IMRO MoMAF - FIO	JUVO (Java Upwelling Variation Observation)	Sub-Surface Mooring	JUVO 2011	-8.53397	106.757	South of Java
29	2011	IMRO MoMAF - FIO	JUVO (Java Upwelling Variation Observation)	CTD	Juv_a	-8.5006	106.742	South of Java
30	2011	IMRO MoMAF - FIO	JUVO (Java Upwelling Variation Observation)	CTD	Rama08	-6.38067	105.368	Sunda Strait
31	2011	IMRO MoMAF - FIO	JUVO (Java Upwelling Variation Observation)	CTD	Rama09	-6.2995	105.656	Sunda Strait
32	2011	IMRO MoMAF - FIO - UMD	SITE (The South China Sea – Indonesian Seas Transport/Exchange)	TRBM (Trawl Resistance Bottom Mounted)	S1	-6.01297	105.901	Sunda Strait
33	2011	IMRO MoMAF - FIO - UMD	SITE (The South China Sea – Indonesian Seas Transport/Exchange)	TRBM (Trawl Resistance Bottom Mounted)	S2	-5.93697	105.792	Sunda Strait
34	2011	IMRO MoMAF - FIO - UMD	SITE (The South China Sea – Indonesian Seas Transport/Exchange)	TRBM (Trawl Resistance Bottom Mounted)	S3	-5.85688	105.892	Sunda Strait
35	2011	IMRO MoMAF - FIO - UMD	SITE (The South China Sea – Indonesian Seas Transport/Exchange)	TRBM (Trawl Resistance Bottom Mounted)	S2-new	-5.83083	105.852	Sunda Strait
36	2011	IMRO MoMAF - FIO - UMD	SITE (The South China Sea – Indonesian Seas Transport/Exchange)	TRBM (Trawl Resistance Bottom Mounted)	B2	-2.28325	108.25	Karimata Strait
37	2011	IMRO MoMAF - FIO - UMD	SITE (The South China Sea – Indonesian Seas Transport/Exchange)	TRBM (Trawl Resistance Bottom Mounted)	B3	-1.917	108.55	Karimata Strait
38	2011	IMRO MoMAF - FIO - UMD	SITE (The South China Sea – Indonesian Seas Transport/Exchange)	TRBM (Trawl Resistance Bottom Mounted)	B1	-2.78142	107.159	Bangka Belitung
39	2011	IMRO MoMAF - LDEO CU	MITF (Monitoring Indonesian Through Flow)	Sub-Surface Mooring	MAK	-2.86138	118.465	Makassar Strait
40	2011	IMRO MoMAF - LDEO CU	MITF (Monitoring Indonesian Through Flow)	CTD	ctd_1	-2.90327	118.456	Makassar Strait
41	2011	IMRO MoMAF - LDEO CU	MITF (Monitoring Indonesian Through Flow)	CTD	ctd_2	-2.8683	118.334	Makassar Strait
42	2011	IMRO MoMAF - LDEO CU	MITF (Monitoring Indonesian Through Flow)	CTD	ctd_3	-2.8683	118.603	Makassar Strait
43	2011	IMRO MoMAF - LDEO CU	MITF (Monitoring Indonesian Through Flow)	CTD	ctd_4	-2.86698	118.739	Makassar Strait
44	2012	IMRO MoMAF - FIO	JUVO (Java Upwelling Variation Observation)	Sub-Surface Mooring	JUVO 2012	-7.92345	100.143	Indian Ocean
45	2012	IMRO MoMAF - FIO	JUVO (Java Upwelling Variation Observation)	CTD	St_03	-8.31783	103.743	Indian Ocean
46	2012	IMRO MoMAF - FIO	JUVO (Java Upwelling Variation Observation)	CTD	St_04	-8.10467	101.235	Indian Ocean
47	2012	IMRO MoMAF - FIO	JUVO (Java Upwelling Variation Observation)	CTD	St_05	-7.90617	100.191	Indian Ocean
48	2012	IMRO MoMAF - FIO	JUVO (Java Upwelling Variation Observation)	CTD	St_06	-7.44233	101.773	Indian Ocean
49	2012	IMRO MoMAF - FIO	JUVO (Java Upwelling Variation Observation)	CTD	St_06a	-7.43967	101.776	Indian Ocean
50	2012	IMRO MoMAF - FIO	JUVO (Java Upwelling Variation Observation)	CTD	St-07	-7.31733	102.225	Indian Ocean
51	2012	IMRO MoMAF - FIO	JUVO (Java Upwelling Variation Observation)	CTD	St_07a	-7.31767	102.223	Indian Ocean
52	2012	IMRO MoMAF - FIO	JUVO (Java Upwelling Variation Observation)	CTD	St_07b	-7.3185	102.22	Indian Ocean
53	2012	IMRO MoMAF - FIO	JUVO (Java Upwelling Variation Observation)	Surface Mooring	RAMA 2012	-8.54289	106.743	South of Java
54	2012	IMRO MoMAF - FIO	JUVO (Java Upwelling Variation Observation)	CTD	St_02a	-8.56817	106.788	South of Java
55	2012	IMRO MoMAF - FIO	JUVO (Java Upwelling Variation Observation)	CTD	St_02b	-8.56867	106.789	South of Java
56	2012	IMRO MoMAF - FIO	JUVO (Java Upwelling Variation Observation)	CTD	St_02c	-8.563	106.789	South of Java
57	2012	IMRO MoMAF - FIO	JUVO (Java Upwelling Variation Observation)	CTD	St_08	-6.41667	105.254	Sunda Strait
58	2012	IMRO MoMAF - FIO	JUVO (Java Upwelling Variation Observation)	CTD	St_08a	-6.41783	105.257	Sunda Strait
59	2012	IMRO MoMAF - FIO	JUVO (Java Upwelling Variation Observation)	CTD	St_09	-6.368	105.422	Sunda Strait
60	2012	IMRO MoMAF - FIO	JUVO (Java Upwelling Variation Observation)	CTD	St_10	-6.2905	105.634	Sunda Strait
61	2012	IMRO MoMAF - FIO	JUVO (Java Upwelling Variation Observation)	CTD	St_10a	-6.28833	105.643	Sunda Strait
62	2012	RDCMCR MoMAF - FIO	MOMSEI (Monsoon Onset Monitoring and Its Social andvEcosystem Impacts)	CTD	ST02	-6.65	104.5	Indian Ocean
63	2012	RDCMCR MoMAF - FIO	MOMSEI (Monsoon Onset Monitoring and Its Social andvEcosystem Impacts)	CTD	ST03	-6.8	104	Indian Ocean
64	2012	RDCMCR MoMAF - FIO	MOMSEI (Monsoon Onset Monitoring and Its Social andvEcosystem Impacts)	CTD	ST04	-6.95	103.5	Indian Ocean
65	2012	RDCMCR MoMAF - FIO	MOMSEI (Monsoon Onset Monitoring and Its Social andvEcosystem Impacts)	CTD	ST05	-7.1	103	Indian Ocean
66	2012	RDCMCR MoMAF - FIO	MOMSEI (Monsoon Onset Monitoring and Its Social andvEcosystem Impacts)	CTD	ST06	-7.25	102.5	Indian Ocean
67	2012	RDCMCR MoMAF - FIO	MOMSEI (Monsoon Onset Monitoring and Its Social andvEcosystem Impacts)	CTD	ST07	-7.4	102	Indian Ocean
68	2012	RDCMCR MoMAF - FIO	MOMSEI (Monsoon Onset Monitoring and Its Social andvEcosystem Impacts)	CTD	ST08	-7.55	101.5	Indian Ocean
69	2012	RDCMCR MoMAF - FIO	MOMSEI (Monsoon Onset Monitoring and Its Social andvEcosystem Impacts)	CTD	ST09	-7.7	101	Indian Ocean
70	2012	RDCMCR MoMAF - FIO	MOMSEI (Monsoon Onset Monitoring and Its Social andvEcosystem Impacts)	CTD	ST10	-7.85	100.5	Indian Ocean
71	2012	RDCMCR MoMAF - FIO	MOMSEI (Monsoon Onset Monitoring and Its Social andvEcosystem Impacts)	CTD	ST11	-8	100	Indian Ocean
72	2012	RDCMCR MoMAF - FIO	MOMSEI (Monsoon Onset Monitoring and Its Social andvEcosystem Impacts)	CTD	Add01	-4.98333	95.35	Indian Ocean
73	2012	RDCMCR MoMAF - FIO	MOMSEI (Monsoon Onset Monitoring and Its Social andvEcosystem Impacts)	CTD	ST12	-1.5	90	Indian Ocean
74	2012	RDCMCR MoMAF - FIO	MOMSEI (Monsoon Onset Monitoring and Its Social andvEcosystem Impacts)	CTD	ST13	-1.25	90	Indian Ocean
75	2012	RDCMCR MoMAF - FIO	MOMSEI (Monsoon Onset Monitoring and Its Social andvEcosystem Impacts)	CTD	ST14	-1	90	Indian Ocean
76	2012	RDCMCR MoMAF - FIO	MOMSEI (Monsoon Onset Monitoring and Its Social andvEcosystem Impacts)	CTD	ST15	-0.75	90	Indian Ocean
77	2012	RDCMCR MoMAF - FIO	MOMSEI (Monsoon Onset Monitoring and Its Social andvEcosystem Impacts)	CTD	ST16	-0.5	90	Indian Ocean
78	2012	RDCMCR MoMAF - FIO	MOMSEI (Monsoon Onset Monitoring and Its Social andvEcosystem Impacts)	CTD	ST17	-0.25	90	Indian Ocean
79	2012	RDCMCR MoMAF - FIO	MOMSEI (Monsoon Onset Monitoring and Its Social andvEcosystem Impacts)	CTD	ST18	0	90	Indian Ocean
80	2012	RDCMCR MoMAF - FIO	MOMSEI (Monsoon Onset Monitoring and Its Social andvEcosystem Impacts)	CTD	ST19	0.25	90	Indian Ocean
81	2012	RDCMCR MoMAF - FIO	MOMSEI (Monsoon Onset Monitoring and Its Social andvEcosystem Impacts)	CTD	ST20	0.5	90	Indian Ocean
82	2012	RDCMCR MoMAF - FIO	MOMSEI (Monsoon Onset Monitoring and Its Social andvEcosystem Impacts)	CTD	ST21	0.75	90	Indian Ocean
83	2012	RDCMCR MoMAF - FIO	MOMSEI (Monsoon Onset Monitoring and Its Social andvEcosystem Impacts)	CTD	ST22	1	90	Indian Ocean
84	2012	RDCMCR MoMAF - FIO	MOMSEI (Monsoon Onset Monitoring and Its Social andvEcosystem Impacts)	CTD	ST23	1.25	90	Indian Ocean
85	2012	RDCMCR MoMAF - FIO	MOMSEI (Monsoon Onset Monitoring and Its Social andvEcosystem Impacts)	CTD	ST24	1.5	90	Indian Ocean
86	2012	RDCMCR MoMAF - FIO	MOMSEI (Monsoon Onset Monitoring and Its Social andvEcosystem Impacts)	CTD	ST25	0	91	Indian Ocean
87	2012	RDCMCR MoMAF - FIO	MOMSEI (Monsoon Onset Monitoring and Its Social andvEcosystem Impacts)	CTD	ST26	0	92	Indian Ocean
88	2012	RDCMCR MoMAF - FIO	MOMSEI (Monsoon Onset Monitoring and Its Social andvEcosystem Impacts)	CTD	ST27	0	93	Indian Ocean
89	2012	RDCMCR MoMAF - FIO	MOMSEI (Monsoon Onset Monitoring and Its Social andvEcosystem Impacts)	CTD	ST28	0	94	Indian Ocean
90	2012	RDCMCR MoMAF - FIO	MOMSEI (Monsoon Onset Monitoring and Its Social andvEcosystem Impacts)	CTD	ST29	0	95	Indian Ocean
91	2012	RDCMCR MoMAF - FIO	MOMSEI (Monsoon Onset Monitoring and Its Social andvEcosystem Impacts)	CTD	ST30	-0.5	95.3125	Indian Ocean
92	2012	RDCMCR MoMAF - FIO	MOMSEI (Monsoon Onset Monitoring and Its Social andvEcosystem Impacts)	CTD	ST31	-1	95.6217	Indian Ocean
93	2012	RDCMCR MoMAF - FIO	MOMSEI (Monsoon Onset Monitoring and Its Social andvEcosystem Impacts)	CTD	ST32	-1.5	95.9375	Indian Ocean
94	2012	RDCMCR MoMAF - FIO	MOMSEI (Monsoon Onset Monitoring and Its Social andvEcosystem Impacts)	CTD	ST33	-2	96.25	Indian Ocean
95	2012	RDCMCR MoMAF - FIO	MOMSEI (Monsoon Onset Monitoring and Its Social andvEcosystem Impacts)	CTD	ST34	-2.5	96.5625	Indian Ocean
96	2012	RDCMCR MoMAF - FIO	MOMSEI (Monsoon Onset Monitoring and Its Social andvEcosystem Impacts)	CTD	ST35	-3	96.875	Indian Ocean
97	2012	RDCMCR MoMAF - FIO	MOMSEI (Monsoon Onset Monitoring and Its Social andvEcosystem Impacts)	CTD	ST36	-3.5	97.1875	Indian Ocean
98	2012	RDCMCR MoMAF - FIO	MOMSEI (Monsoon Onset Monitoring and Its Social andvEcosystem Impacts)	CTD	ST37	-4	97.5	Indian Ocean
99	2012	RDCMCR MoMAF - FIO	MOMSEI (Monsoon Onset Monitoring and Its Social andvEcosystem Impacts)	CTD	Add01	-4.9	99.9167	Indian Ocean
100	2012	RDCMCR MoMAF - FIO	MOMSEI (Monsoon Onset Monitoring and Its Social andvEcosystem Impacts)	CTD	ST01	-6.5	105	Sunda Strait
101	2012	IMRO MoMAF - FIO - UMD	SITE (The South China Sea – Indonesian Seas Transport/Exchange)	TRBM (Trawl Resistance Bottom Mounted)	S2	-5.93697	105.792	Sunda Strait
102	2012	IMRO MoMAF - FIO - UMD	SITE (The South China Sea – Indonesian Seas Transport/Exchange)	TRBM (Trawl Resistance Bottom Mounted)	S3	-5.85688	105.892	Sunda Strait
103	2012	IMRO MoMAF - FIO - UMD	SITE (The South China Sea – Indonesian Seas Transport/Exchange)	CTD	STAA01	-5.90702	105.961	Sunda Strait
104	2012	IMRO MoMAF - FIO - UMD	SITE (The South China Sea – Indonesian Seas Transport/Exchange)	CTD	STA02	-5.83267	105.851	Sunda Strait
105	2012	IMRO MoMAF - FIO - UMD	SITE (The South China Sea – Indonesian Seas Transport/Exchange)	CTD	STA03	-5.85783	105.893	Sunda Strait
106	2012	IMRO MoMAF - FIO - UMD	SITE (The South China Sea – Indonesian Seas Transport/Exchange)	CTD	STA02NEW	-5.83078	105.853	Sunda Strait
107	2012	IMRO MoMAF - FIO - UMD	SITE (The South China Sea – Indonesian Seas Transport/Exchange)	CTD	STA03REV	-5.86067	105.892	Sunda Strait
108	2012	IMRO MoMAF - FIO - UMD	SITE (The South China Sea – Indonesian Seas Transport/Exchange)	CTD	STA04	-5.83167	105.853	Sunda Strait
109	2012	IMRO MoMAF - FIO - UMD	SITE (The South China Sea – Indonesian Seas Transport/Exchange)	CTD	STA05	-6.05048	105.828	Sunda Strait
110	2012	IMRO MoMAF - FIO - UMD	SITE (The South China Sea – Indonesian Seas Transport/Exchange)	CTD	STA06	-5.98453	105.731	Sunda Strait
111	2012	IMRO MoMAF - FIO - UMD	SITE (The South China Sea – Indonesian Seas Transport/Exchange)	CTD	STA07	-5.92602	105.662	Sunda Strait
112	2012	IMRO MoMAF - FIO - UMD	SITE (The South China Sea – Indonesian Seas Transport/Exchange)	CTD	STA13/S2NEW	-5.83078	105.853	Sunda Strait
113	2012	IMRO MoMAF - FIO - UMD	SITE (The South China Sea – Indonesian Seas Transport/Exchange)	CTD	STA14/S2S3	-5.83167	105.853	Sunda Strait
114	2012	IMRO MoMAF - FIO - UMD	SITE (The South China Sea – Indonesian Seas Transport/Exchange)	CTD	STA15/S3	-5.86067	105.892	Sunda Strait
115	2012	IMRO MoMAF - FIO - UMD	SITE (The South China Sea – Indonesian Seas Transport/Exchange)	TRBM (Trawl Resistance Bottom Mounted)	B2	-2.28325	108.25	Karimata Strait
116	2012	IMRO MoMAF - FIO - UMD	SITE (The South China Sea – Indonesian Seas Transport/Exchange)	TRBM (Trawl Resistance Bottom Mounted)	B3	-1.917	108.55	Karimata Strait
117	2012	IMRO MoMAF - FIO - UMD	SITE (The South China Sea – Indonesian Seas Transport/Exchange)	CTD	STA09	-2.28167	108.248	Karimata Strait
118	2012	IMRO MoMAF - FIO - UMD	SITE (The South China Sea – Indonesian Seas Transport/Exchange)	CTD	STA10	-2.3565	108.143	Karimata Strait
119	2012	IMRO MoMAF - FIO - UMD	SITE (The South China Sea – Indonesian Seas Transport/Exchange)	CTD	STA11	-1.91567	108.549	Karimata Strait
120	2012	IMRO MoMAF - FIO - UMD	SITE (The South China Sea – Indonesian Seas Transport/Exchange)	CTD	CTD.4 (ADD Karimata 2)	-2.35947	108	Karimata Strait
121	2012	IMRO MoMAF - FIO - UMD	SITE (The South China Sea – Indonesian Seas Transport/Exchange)	CTD	CTD.5 (B2)	-2.28558	108.252	Karimata Strait
122	2012	IMRO MoMAF - FIO - UMD	SITE (The South China Sea – Indonesian Seas Transport/Exchange)	CTD	CTD.6 (ADD Karimata 3)	-2.10287	108.398	Karimata Strait
123	2012	IMRO MoMAF - FIO - UMD	SITE (The South China Sea – Indonesian Seas Transport/Exchange)	CTD	CTD.7 (B3)	-1.91367	108.55	Karimata Strait
124	2012	IMRO MoMAF - FIO - UMD	SITE (The South China Sea – Indonesian Seas Transport/Exchange)	CTD	CTD.8 (ADD Karimata 4)	-1.8	108.633	Karimata Strait
125	2012	IMRO MoMAF - FIO - UMD	SITE (The South China Sea – Indonesian Seas Transport/Exchange)	TRBM (Trawl Resistance Bottom Mounted)	B1	-2.78142	107.159	Bangka Belitung
126	2012	IMRO MoMAF - FIO - UMD	SITE (The South China Sea – Indonesian Seas Transport/Exchange)	TRBM (Trawl Resistance Bottom Mounted)	B4	-2.87	107.258	Bangka Belitung
127	2012	IMRO MoMAF - FIO - UMD	SITE (The South China Sea – Indonesian Seas Transport/Exchange)	CTD	STAB1	-2.57883	107.246	Bangka Belitung
128	2012	IMRO MoMAF - FIO - UMD	SITE (The South China Sea – Indonesian Seas Transport/Exchange)	CTD	STA12	-2.57917	107.073	Bangka Belitung
129	2012	IMRO MoMAF - FIO - UMD	SITE (The South China Sea – Indonesian Seas Transport/Exchange)	CTD	CTD.1 (B4)	-2.5796	107.016	Bangka Belitung
130	2012	IMRO MoMAF - FIO - UMD	SITE (The South China Sea – Indonesian Seas Transport/Exchange)	CTD	CTD.2 (B1)	-2.58118	107.248	Bangka Belitung
131	2012	IMRO MoMAF - FIO - UMD	SITE (The South China Sea – Indonesian Seas Transport/Exchange)	CTD	CTD.3 (ADD Karimata 1)	-2.49508	107.541	Bangka Belitung
132	2012	IMRO MoMAF - FIO - UMD	SITE (The South China Sea – Indonesian Seas Transport/Exchange)	CTD	STA08	-3.76317	107.541	Java Sea
133	2012	IMRO MoMAF - FIO - UMD	SITE (The South China Sea – Indonesian Seas Transport/Exchange)	CTD	STAB1NEW	-3.57933	107.247	Java Sea
134	2012	IMRO MoMAF - FIO - UMD	SITE (The South China Sea – Indonesian Seas Transport/Exchange)	CTD	CTD.9 (ADD 5)	-4.579	106.879	Java Sea
135	2012	IMRO MoMAF - FIO - UMD	SITE (The South China Sea – Indonesian Seas Transport/Exchange)	CTD	CTD.10 (ADD 6)	-5.41765	106.178	Java Sea
136	2013	RDCMCR MoMAF - FIO	MOMSEI (Monsoon Onset Monitoring and Its Social andvEcosystem Impacts)	CTD	1_M01	-8.63692	113.635	South of Java
137	2013	RDCMCR MoMAF - FIO	MOMSEI (Monsoon Onset Monitoring and Its Social andvEcosystem Impacts)	CTD	2_M02	-9.03	113.173	South of Java
138	2013	RDCMCR MoMAF - FIO	MOMSEI (Monsoon Onset Monitoring and Its Social andvEcosystem Impacts)	CTD	3_M03	-9.43128	113.038	South of Java
139	2013	RDCMCR MoMAF - FIO	MOMSEI (Monsoon Onset Monitoring and Its Social andvEcosystem Impacts)	CTD	4_B1	-8.4795	111.607	South of Java
140	2013	RDCMCR MoMAF - FIO	MOMSEI (Monsoon Onset Monitoring and Its Social andvEcosystem Impacts)	CTD	5_B2	-8.56982	111.501	South of Java
141	2013	RDCMCR MoMAF - FIO	MOMSEI (Monsoon Onset Monitoring and Its Social andvEcosystem Impacts)	CTD	6_B3	-8.74233	111.358	South of Java
142	2013	RDCMCR MoMAF - FIO	MOMSEI (Monsoon Onset Monitoring and Its Social andvEcosystem Impacts)	CTD	7_B4	-8.90883	111.217	South of Java
143	2013	RDCMCR MoMAF - FIO	MOMSEI (Monsoon Onset Monitoring and Its Social andvEcosystem Impacts)	CTD	8_B5	-9.55103	110.672	South of Java
144	2013	RDCMCR MoMAF - FIO	MOMSEI (Monsoon Onset Monitoring and Its Social andvEcosystem Impacts)	CTD	9_B6	-9.8574	110.392	South of Java
145	2013	RDCMCR MoMAF - FIO	MOMSEI (Monsoon Onset Monitoring and Its Social andvEcosystem Impacts)	CTD	10_A1	-7.90688	108.023	South of Java
146	2013	RDCMCR MoMAF - FIO	MOMSEI (Monsoon Onset Monitoring and Its Social andvEcosystem Impacts)	CTD	11_A2-1	-7.9469	107.923	South of Java
147	2013	RDCMCR MoMAF - FIO	MOMSEI (Monsoon Onset Monitoring and Its Social andvEcosystem Impacts)	CTD	12_A2-2	-7.9462	107.923	South of Java
148	2013	RDCMCR MoMAF - FIO	MOMSEI (Monsoon Onset Monitoring and Its Social andvEcosystem Impacts)	CTD	13_A0	-7.8367	108.212	South of Java
149	2013	RDCMCR MoMAF - FIO	MOMSEI (Monsoon Onset Monitoring and Its Social andvEcosystem Impacts)	CTD	14_A3	-7.98837	107.819	South of Java
150	2013	RDCMCR MoMAF - FIO	MOMSEI (Monsoon Onset Monitoring and Its Social andvEcosystem Impacts)	CTD	15_A4	-8.04387	107.702	South of Java
151	2013	RDCMCR MoMAF - FIO	MOMSEI (Monsoon Onset Monitoring and Its Social andvEcosystem Impacts)	CTD	16_A5	-8.23525	107.332	South of Java
152	2013	RDCMCR MoMAF - FIO	MOMSEI (Monsoon Onset Monitoring and Its Social andvEcosystem Impacts)	CTD	17_A6	-8.49748	106.752	South of Java
153	2013	IMRO MoMAF - FIO - UMD	SITE (The South China Sea – Indonesian Seas Transport/Exchange)	TRBM (Trawl Resistance Bottom Mounted)	S2	-5.93697	105.792	Sunda Strait
154	2013	IMRO MoMAF - FIO - UMD	SITE (The South China Sea – Indonesian Seas Transport/Exchange)	TRBM (Trawl Resistance Bottom Mounted)	S3	-5.85688	105.892	Sunda Strait
155	2013	IMRO MoMAF - FIO - UMD	SITE (The South China Sea – Indonesian Seas Transport/Exchange)	CTD	STAA01	-5.90702	105.961	Sunda Strait
156	2013	IMRO MoMAF - FIO - UMD	SITE (The South China Sea – Indonesian Seas Transport/Exchange)	CTD	STA02	-5.83267	105.851	Sunda Strait
157	2013	IMRO MoMAF - FIO - UMD	SITE (The South China Sea – Indonesian Seas Transport/Exchange)	CTD	STA03	-5.85783	105.893	Sunda Strait
158	2013	IMRO MoMAF - FIO - UMD	SITE (The South China Sea – Indonesian Seas Transport/Exchange)	CTD	STA02NEW	-5.83078	105.853	Sunda Strait
159	2013	IMRO MoMAF - FIO - UMD	SITE (The South China Sea – Indonesian Seas Transport/Exchange)	CTD	STA03REV	-5.86067	105.892	Sunda Strait
160	2013	IMRO MoMAF - FIO - UMD	SITE (The South China Sea – Indonesian Seas Transport/Exchange)	CTD	STA04	-5.83167	105.853	Sunda Strait
161	2013	IMRO MoMAF - FIO - UMD	SITE (The South China Sea – Indonesian Seas Transport/Exchange)	CTD	STA05	-6.05048	105.828	Sunda Strait
162	2013	IMRO MoMAF - FIO - UMD	SITE (The South China Sea – Indonesian Seas Transport/Exchange)	CTD	STA06	-5.98453	105.731	Sunda Strait
163	2013	IMRO MoMAF - FIO - UMD	SITE (The South China Sea – Indonesian Seas Transport/Exchange)	CTD	STA07	-5.92602	105.662	Sunda Strait
164	2013	IMRO MoMAF - FIO - UMD	SITE (The South China Sea – Indonesian Seas Transport/Exchange)	CTD	STA13/S2NEW	-5.83078	105.853	Sunda Strait
165	2013	IMRO MoMAF - FIO - UMD	SITE (The South China Sea – Indonesian Seas Transport/Exchange)	CTD	STA14/S2S3	-5.83167	105.853	Sunda Strait
166	2013	IMRO MoMAF - FIO - UMD	SITE (The South China Sea – Indonesian Seas Transport/Exchange)	CTD	STA15/S3	-5.86067	105.892	Sunda Strait
167	2013	IMRO MoMAF - FIO - UMD	SITE (The South China Sea – Indonesian Seas Transport/Exchange)	TRBM (Trawl Resistance Bottom Mounted)	B2	-2.28325	108.25	Karimata Strait
168	2013	IMRO MoMAF - FIO - UMD	SITE (The South China Sea – Indonesian Seas Transport/Exchange)	TRBM (Trawl Resistance Bottom Mounted)	B3	-1.917	108.55	Karimata Strait
169	2013	IMRO MoMAF - FIO - UMD	SITE (The South China Sea – Indonesian Seas Transport/Exchange)	CTD	STA09	-2.28167	108.248	Karimata Strait
170	2013	IMRO MoMAF - FIO - UMD	SITE (The South China Sea – Indonesian Seas Transport/Exchange)	CTD	STA10	-2.3565	108.143	Karimata Strait
171	2013	IMRO MoMAF - FIO - UMD	SITE (The South China Sea – Indonesian Seas Transport/Exchange)	CTD	STA11	-1.91567	108.549	Karimata Strait
172	2013	IMRO MoMAF - FIO - UMD	SITE (The South China Sea – Indonesian Seas Transport/Exchange)	TRBM (Trawl Resistance Bottom Mounted)	B1	-2.78142	107.159	Bangka Belitung
173	2013	IMRO MoMAF - FIO - UMD	SITE (The South China Sea – Indonesian Seas Transport/Exchange)	TRBM (Trawl Resistance Bottom Mounted)	B4	-2.87	107.258	Bangka Belitung
174	2013	IMRO MoMAF - FIO - UMD	SITE (The South China Sea – Indonesian Seas Transport/Exchange)	CTD	STAB1	-2.57883	107.246	Bangka Belitung
175	2013	IMRO MoMAF - FIO - UMD	SITE (The South China Sea – Indonesian Seas Transport/Exchange)	CTD	STA12	-2.57917	107.073	Bangka Belitung
176	2013	IMRO MoMAF - FIO - UMD	SITE (The South China Sea – Indonesian Seas Transport/Exchange)	CTD	STA08	-3.76317	107.541	Java Sea
177	2013	IMRO MoMAF - FIO - UMD	SITE (The South China Sea – Indonesian Seas Transport/Exchange)	CTD	STAB1NEW	-3.57933	107.247	Java Sea
178	2013	IMRO MoMAF - FIO - UMD	SITE (The South China Sea – Indonesian Seas Transport/Exchange)	CTD	STA01	-7.63333	115.117	Bali Sea
179	2013	IMRO MoMAF - FIO - UMD	SITE (The South China Sea – Indonesian Seas Transport/Exchange)	CTD	STA02	-7.85	115.467	Bali Sea
180	2013	IMRO MoMAF - FIO - UMD	SITE (The South China Sea – Indonesian Seas Transport/Exchange)	CTD	STA03	-8.18333	115.783	Bali Sea
181	2013	IMRO MoMAF - FIO - UMD	SITE (The South China Sea – Indonesian Seas Transport/Exchange)	Sub-Surface Mooring	L1	-8.41572	115.807	Lombok Strait
182	2013	IMRO MoMAF - FIO - UMD	SITE (The South China Sea – Indonesian Seas Transport/Exchange)	CTD	STA04	-8.43333	115.767	Lombok Strait
183	2013	IMRO MoMAF - FIO - UMD	SITE (The South China Sea – Indonesian Seas Transport/Exchange)	CTD	STA05	-8.43333	115.85	Lombok Strait
184	2013	IMRO MoMAF - FIO - UMD	SITE (The South China Sea – Indonesian Seas Transport/Exchange)	CTD	STA06	-8.43333	115.933	Lombok Strait
185	2013	IMRO MoMAF - FIO - UMD	SITE (The South China Sea – Indonesian Seas Transport/Exchange)	CTD	STA09	-8.6	115.933	Lombok Strait
186	2013	IMRO MoMAF - FIO - UMD	SITE (The South China Sea – Indonesian Seas Transport/Exchange)	CTD	STA08	-8.6	115.667	Lombok Strait
187	2013	IMRO MoMAF - FIO - UMD	SITE (The South China Sea – Indonesian Seas Transport/Exchange)	CTD	STA07	-8.58333	115.517	Lombok Strait
188	2013	IMRO MoMAF - FIO - UMD	SITE (The South China Sea – Indonesian Seas Transport/Exchange)	CTD	STA12	-9.00167	115.833	Lombok Strait
189	2013	IMRO MoMAF - FIO - UMD	SITE (The South China Sea – Indonesian Seas Transport/Exchange)	CTD	STA11	-8.93333	115.667	Lombok Strait
190	2013	IMRO MoMAF - FIO	JUVO (Java Upwelling Variation Observation)	Surface Mooring	RAMA	-7.92345	100.143	Indian Ocean
191	2013	IMRO MoMAF - FIO	JUVO (Java Upwelling Variation Observation)	CTD	CTD 3	-7.90629	99.9899	Indian Ocean
192	2013	IMRO MoMAF - FIO	JUVO (Java Upwelling Variation Observation)	CTD	CTD 4	-7.43959	101.773	Indian Ocean
193	2013	IMRO MoMAF - FIO	JUVO (Java Upwelling Variation Observation)	CTD	CTD 5	-7.31572	102.219	Indian Ocean
194	2013	IMRO MoMAF - FIO	JUVO (Java Upwelling Variation Observation)	CTD	CTD 6	-7.10689	102.928	Indian Ocean
195	2013	IMRO MoMAF - FIO	JUVO (Java Upwelling Variation Observation)	CTD	CTD 7	-6.88347	103.693	Indian Ocean
196	2013	IMRO MoMAF - FIO	JUVO (Java Upwelling Variation Observation)	CTD	CTD 8	-6.64745	104.487	Indian Ocean
197	2013	IMRO MoMAF - FIO	JUVO (Java Upwelling Variation Observation)	Sub-Surface Mooring	JUV	-8.54289	106.743	South of Java
198	2013	IMRO MoMAF - FIO	JUVO (Java Upwelling Variation Observation)	CTD	CTD 1	-7.7925	106.063	South of Java
199	2013	IMRO MoMAF - FIO	JUVO (Java Upwelling Variation Observation)	CTD	CTD 2	-8.55208	106.813	South of Java
200	2013	IMRO MoMAF - FIO	JUVO (Java Upwelling Variation Observation)	CTD	CTD 9	-6.41595	105.259	Sunda Strait
201	2013	IMRO MoMAF - FIO	JUVO (Java Upwelling Variation Observation)	CTD	CTD 10	-6.42399	105.472	Sunda Strait
202	2013	IMRO MoMAF - FIO	JUVO (Java Upwelling Variation Observation)	CTD	CTD 11	-6.28864	105.64	Sunda Strait
203	2013	IMRO MoMAF - LDEO CU	MITF (Monitoring Indonesian Through Flow)	Sub-Surface Mooring	MAK	-2.86138	118.465	Makassar Strait
204	2014	RCO BRIN - IOCAS	ITF-WPOC	CTD	1	-5.6736	110.847	Java Sea
205	2014	RCO BRIN - IOCAS	ITF-WPOC	CTD	2	-5.73352	113.849	Java Sea
206	2014	RCO BRIN - IOCAS	ITF-WPOC	CTD	3	-5.9005	115.6	Java Sea
207	2014	RCO BRIN - IOCAS	ITF-WPOC	CTD	4	-5.91647	116.282	Java Sea
208	2014	RCO BRIN - IOCAS	ITF-WPOC	CTD	5	-5.96807	116.849	Flores Sea
209	2014	RCO BRIN - IOCAS	ITF-WPOC	CTD	6	-6.05205	117.95	Flores Sea
210	2014	RCO BRIN - IOCAS	ITF-WPOC	CTD	7	-5.91692	119.216	Flores Sea
211	2014	RCO BRIN - IOCAS	ITF-WPOC	CTD	8	-5.71392	120.998	Flores Sea
212	2014	RCO BRIN - IOCAS	ITF-WPOC	CTD	9	-5.29747	123.396	Banda Sea
213	2014	RCO BRIN - IOCAS	ITF-WPOC	CTD	10	-4.59718	123.998	Banda Sea
214	2014	RCO BRIN - IOCAS	ITF-WPOC	CTD	11	-3.88977	124.697	Banda Sea
215	2014	RCO BRIN - IOCAS	ITF-WPOC	CTD	12	-3.19908	125.396	Banda Sea
216	2014	RCO BRIN - IOCAS	ITF-WPOC	CTD	13	-2.79877	126.101	Ceram Sea
217	2014	RCO BRIN - IOCAS	ITF-WPOC	CTD	14	-1.80117	127.006	Ceram Sea
218	2014	RCO BRIN - IOCAS	ITF-WPOC	CTD	15	-0.79695	126.796	Celebes Sea
219	2014	RCO BRIN - IOCAS	ITF-WPOC	CTD	16	0.304033	126.797	Celebes Sea
220	2014	RCO BRIN - IOCAS	ITF-WPOC	CTD	17	1.30262	126.797	Celebes Sea
221	2014	RCO BRIN - IOCAS	ITF-WPOC	Sub-Surface Mooring	18	1.99722	125.708	Celebes Sea
222	2014	RCO BRIN - IOCAS	ITF-WPOC	CTD	19	2.00117	126.088	Celebes Sea
223	2014	RCO BRIN - IOCAS	ITF-WPOC	Sub-Surface Mooring	20	2.00113	126.496	Celebes Sea
224	2014	RCO BRIN - IOCAS	ITF-WPOC	CTD	21	1.9998	126.895	Celebes Sea
225	2014	RCO BRIN - IOCAS	ITF-WPOC	Sub-Surface Mooring	22	2.00383	127.299	Celebes Sea
226	2014	RCO BRIN - IOCAS	ITF-WPOC	CTD	23	2.50158	127.15	Celebes Sea
227	2014	RCO BRIN - IOCAS	ITF-WPOC	CTD	24	3.00193	127.007	Celebes Sea
228	2014	RCO BRIN - IOCAS	ITF-WPOC	CTD	25	3.50073	126.85	Celebes Sea
229	2014	RCO BRIN - IOCAS	ITF-WPOC	CTD	26	4.55223	126.547	Celebes Sea
230	2014	RCO BRIN - IOCAS	ITF-WPOC	CTD	27	4.8655	126.328	Celebes Sea
231	2014	RCO BRIN - IOCAS	ITF-WPOC	CTD	28	4.0072	124.597	Celebes Sea
232	2014	RCO BRIN - IOCAS	ITF-WPOC	CTD	29	3.5011	124.596	Celebes Sea
233	2014	RCO BRIN - IOCAS	ITF-WPOC	CTD	30	2.956	124.574	Celebes Sea
234	2014	RCO BRIN - IOCAS	ITF-WPOC	CTD	31	2.50468	124.598	Celebes Sea
235	2014	RCO BRIN - IOCAS	ITF-WPOC	CTD	32	1.9987	124.597	Celebes Sea
236	2014	IMRO MoMAF - FIO	JUVO (Java Upwelling Variation Observation)	Surface Mooring	RAMA	-7.92345	100.143	Indian Ocean
237	2014	IMRO MoMAF - FIO	JUVO (Java Upwelling Variation Observation)	CTD	CTD 3	-8.24533	102.956	Indian Ocean
238	2014	IMRO MoMAF - FIO	JUVO (Java Upwelling Variation Observation)	CTD	CTD 4	-8.00118	99.9987	Indian Ocean
239	2014	IMRO MoMAF - FIO	JUVO (Java Upwelling Variation Observation)	CTD	CTD 4	-8.01388	100	Indian Ocean
240	2014	IMRO MoMAF - FIO	JUVO (Java Upwelling Variation Observation)	CTD	CTD 5	-7.51028	101.627	Indian Ocean
241	2014	IMRO MoMAF - FIO	JUVO (Java Upwelling Variation Observation)	CTD	CTD 6	-7.01333	103.293	Indian Ocean
242	2014	IMRO MoMAF - FIO	JUVO (Java Upwelling Variation Observation)	CTD	CTD 7	-6.80328	104.001	Indian Ocean
243	2014	IMRO MoMAF - FIO	JUVO (Java Upwelling Variation Observation)	CTD	CTD 8	-6.60552	104.666	Indian Ocean
244	2014	IMRO MoMAF - FIO	JUVO (Java Upwelling Variation Observation)	Sub-Surface Mooring	JUV	-8.54289	106.743	South of Java
245	2014	IMRO MoMAF - FIO	JUVO (Java Upwelling Variation Observation)	CTD	CTD 1	-7.63289	105.968	South of Java
246	2014	IMRO MoMAF - FIO	JUVO (Java Upwelling Variation Observation)	CTD	CTD 2	-8.32852	106.634	South of Java
247	2014	IMRO MoMAF - FIO	JUVO (Java Upwelling Variation Observation)	CTD	CTD 9	-6.50498	105.016	Sunda Strait
248	2014	IMRO MoMAF - FIO	JUVO (Java Upwelling Variation Observation)	CTD	CTD 10	-6.49627	105.196	Sunda Strait
249	2014	IMRO MoMAF - FIO	JUVO (Java Upwelling Variation Observation)	CTD	CTD 11	-6.4985	105.453	Sunda Strait
250	2014	IMRO MoMAF - FIO	JUVO (Java Upwelling Variation Observation)	CTD	CTD 12	-6.29648	105.576	Sunda Strait
251	2014	IMRO MoMAF - FIO	JUVO (Java Upwelling Variation Observation)	CTD	CTD 13	-5.85302	106.027	Sunda Strait
252	2014	IMRO MoMAF - FIO - UMD	SITE (The South China Sea – Indonesian Seas Transport/Exchange)	TRBM (Trawl Resistance Bottom Mounted)	B2	-2.28325	108.25	Karimata Strait
253	2014	IMRO MoMAF - FIO - UMD	SITE (The South China Sea – Indonesian Seas Transport/Exchange)	TRBM (Trawl Resistance Bottom Mounted)	B3	-1.917	108.55	Karimata Strait
254	2014	IMRO MoMAF - FIO - UMD	SITE (The South China Sea – Indonesian Seas Transport/Exchange)	CTD	B2 TRBM	-2.27635	108.246	Karimata Strait
255	2014	IMRO MoMAF - FIO - UMD	SITE (The South China Sea – Indonesian Seas Transport/Exchange)	CTD	B3 TRBM	-1.9105	108.562	Karimata Strait
256	2014	IMRO MoMAF - FIO - UMD	SITE (The South China Sea – Indonesian Seas Transport/Exchange)	CTD	STA04	-2.46433	108.1	Karimata Strait
257	2014	IMRO MoMAF - FIO - UMD	SITE (The South China Sea – Indonesian Seas Transport/Exchange)	CTD	STA05	-2.2785	108.251	Karimata Strait
258	2014	IMRO MoMAF - FIO - UMD	SITE (The South China Sea – Indonesian Seas Transport/Exchange)	CTD	STA06	-2.08767	108.401	Karimata Strait
259	2014	IMRO MoMAF - FIO - UMD	SITE (The South China Sea – Indonesian Seas Transport/Exchange)	CTD	STA07	-1.91367	108.543	Karimata Strait
260	2014	IMRO MoMAF - FIO - UMD	SITE (The South China Sea – Indonesian Seas Transport/Exchange)	CTD	STA08	-1.81	108.624	Karimata Strait
261	2014	IMRO MoMAF - FIO - UMD	SITE (The South China Sea – Indonesian Seas Transport/Exchange)	CTD	CTD02	-2.57667	108.25	Karimata Strait
262	2014	IMRO MoMAF - FIO - UMD	SITE (The South China Sea – Indonesian Seas Transport/Exchange)	CTD	CTD04	-2.46417	108.098	Karimata Strait
263	2014	IMRO MoMAF - FIO - UMD	SITE (The South China Sea – Indonesian Seas Transport/Exchange)	CTD	CTD05	-2.27783	108.247	Karimata Strait
264	2014	IMRO MoMAF - FIO - UMD	SITE (The South China Sea – Indonesian Seas Transport/Exchange)	CTD	CTD06	-2.08767	108.401	Karimata Strait
265	2014	IMRO MoMAF - FIO - UMD	SITE (The South China Sea – Indonesian Seas Transport/Exchange)	CTD	CTD07	-1.911	108.546	Karimata Strait
266	2014	IMRO MoMAF - FIO - UMD	SITE (The South China Sea – Indonesian Seas Transport/Exchange)	CTD	CTD08	-1.809	108.624	Karimata Strait
267	2014	IMRO MoMAF - FIO - UMD	SITE (The South China Sea – Indonesian Seas Transport/Exchange)	CTD	CTD09	-1.39133	109.017	Karimata Strait
268	2014	IMRO MoMAF - FIO - UMD	SITE (The South China Sea – Indonesian Seas Transport/Exchange)	TRBM (Trawl Resistance Bottom Mounted)	B1	-2.78142	107.159	Bangka Belitung
269	2014	IMRO MoMAF - FIO - UMD	SITE (The South China Sea – Indonesian Seas Transport/Exchange)	TRBM (Trawl Resistance Bottom Mounted)	B4	-2.87	107.258	Bangka Belitung
270	2014	IMRO MoMAF - FIO - UMD	SITE (The South China Sea – Indonesian Seas Transport/Exchange)	CTD	B1 TRBM	-2.57693	107.251	Bangka Belitung
271	2014	IMRO MoMAF - FIO - UMD	SITE (The South China Sea – Indonesian Seas Transport/Exchange)	CTD	B4 TRBM	-2.57643	107.014	Bangka Belitung
272	2014	IMRO MoMAF - FIO - UMD	SITE (The South China Sea – Indonesian Seas Transport/Exchange)	CTD	STA01	-2.57483	107.015	Bangka Belitung
273	2014	IMRO MoMAF - FIO - UMD	SITE (The South China Sea – Indonesian Seas Transport/Exchange)	CTD	STA02	-2.5785	107.249	Bangka Belitung
274	2014	IMRO MoMAF - FIO - UMD	SITE (The South China Sea – Indonesian Seas Transport/Exchange)	CTD	STA03	-2.57933	107.487	Bangka Belitung
275	2014	IMRO MoMAF - FIO - UMD	SITE (The South China Sea – Indonesian Seas Transport/Exchange)	CTD	CTD01	-2.575	107.013	Bangka Belitung
276	2014	IMRO MoMAF - FIO - UMD	SITE (The South China Sea – Indonesian Seas Transport/Exchange)	CTD	CTD03	-2.57983	107.486	Bangka Belitung
277	2014	IMRO MoMAF - FIO - UMD	SITE (The South China Sea – Indonesian Seas Transport/Exchange)	CTD	CTD10	-2.87167	107.277	Bangka Belitung
278	2014	IMRO MoMAF - FIO - UMD	SITE (The South China Sea – Indonesian Seas Transport/Exchange)	CTD	CTD11	-2.86617	107.164	Bangka Belitung
279	2014	IMRO MoMAF - FIO - UMD	SITE (The South China Sea – Indonesian Seas Transport/Exchange)	CTD	CTD12	-2.86333	106.963	Bangka Belitung
280	2014	IMRO MoMAF - FIO - UMD	SITE (The South China Sea – Indonesian Seas Transport/Exchange)	CTD	CTD13	-3.17133	107	Bangka Belitung
281	2014	IMRO MoMAF - FIO - UMD	SITE (The South China Sea – Indonesian Seas Transport/Exchange)	CTD	CTD14	-3.17167	107.255	Bangka Belitung
282	2014	IMRO MoMAF - FIO - UMD	SITE (The South China Sea – Indonesian Seas Transport/Exchange)	CTD	S05	-7.86517	115.282	Bali Sea
283	2014	IMRO MoMAF - FIO - UMD	SITE (The South China Sea – Indonesian Seas Transport/Exchange)	CTD	S06	-8.05143	116.317	Bali Sea
284	2014	IMRO MoMAF - FIO - UMD	SITE (The South China Sea – Indonesian Seas Transport/Exchange)	CTD	S07	-8.43455	115.808	Lombok Strait
285	2014	IMRO MoMAF - FIO - UMD	SITE (The South China Sea – Indonesian Seas Transport/Exchange)	CTD	S08	-8.42257	115.966	Lombok Strait
286	2014	IMRO MoMAF - FIO - UMD	SITE (The South China Sea – Indonesian Seas Transport/Exchange)	CTD	S09	-8.6069	115.513	Lombok Strait
287	2014	IMRO MoMAF - FIO - UMD	SITE (The South China Sea – Indonesian Seas Transport/Exchange)	CTD	S10	-9.06858	115.625	Lombok Strait
288	2014	IMRO MoMAF - FIO - UMD	SITE (The South China Sea – Indonesian Seas Transport/Exchange)	CTD	S11	-8.98803	115.844	Lombok Strait
289	2014	IMRO MoMAF - FIO - UMD	SITE (The South China Sea – Indonesian Seas Transport/Exchange)	CTD	S12	-8.8759	115.364	Lombok Strait
290	2014	IMRO MoMAF - FIO - UMD	SITE (The South China Sea – Indonesian Seas Transport/Exchange)	CTD	S01N	-8.63065	115.772	Lombok Strait
291	2014	IMRO MoMAF - FIO - UMD	SITE (The South China Sea – Indonesian Seas Transport/Exchange)	CTD	S02N	-8.60715	115.987	Lombok Strait
292	2014	IMRO MoMAF - FIO - UMD	SITE (The South China Sea – Indonesian Seas Transport/Exchange)	CTD	S04	-6.99667	117.249	Flores Sea
293	2014	IMRO MoMAF - FIO - UMD	SITE (The South China Sea – Indonesian Seas Transport/Exchange)	CTD	S03	-6.9051	116.367	Flores Sea
294	2015	RCO BRIN - IOCAS	ITF-WPOC	CTD	1	-1.7976	126.803	Ceram Sea
295	2015	RCO BRIN - IOCAS	ITF-WPOC	CTD	2	-0.2046	129.403	Halmahera Sea
296	2015	RCO BRIN - IOCAS	ITF-WPOC	CTD	3	-0.1243	129.24	Halmahera Sea
297	2015	RCO BRIN - IOCAS	ITF-WPOC	CTD	4	-0.0256	129.072	Halmahera Sea
298	2015	RCO BRIN - IOCAS	ITF-WPOC	CTD	5	0.0867	128.961	Halmahera Sea
299	2015	RCO BRIN - IOCAS	ITF-WPOC	CTD	6	0.1681	128.777	Halmahera Sea
300	2015	RCO BRIN - IOCAS	ITF-WPOC	CTD	20	-0.9746	127.276	Halmahera Sea
301	2015	RCO BRIN - IOCAS	ITF-WPOC	CTD	21	-1.1498	128.02	Halmahera Sea
302	2015	RCO BRIN - IOCAS	ITF-WPOC	CTD	22	-1.3221	128.745	Halmahera Sea
303	2015	RCO BRIN - IOCAS	ITF-WPOC	CTD	23	-0.8798	128.853	Halmahera Sea
304	2015	RCO BRIN - IOCAS	ITF-WPOC	CTD	24	-0.4613	128.97	Halmahera Sea
305	2015	RCO BRIN - IOCAS	ITF-WPOC	Sub-Surface Mooring	7	2	127.302	Celebes Sea
306	2015	RCO BRIN - IOCAS	ITF-WPOC	CTD	8	2.0043	126.897	Celebes Sea
307	2015	RCO BRIN - IOCAS	ITF-WPOC	Sub-Surface Mooring	9	1.9777	126.484	Celebes Sea
308	2015	RCO BRIN - IOCAS	ITF-WPOC	CTD	10	1.9988	126.117	Celebes Sea
309	2015	RCO BRIN - IOCAS	ITF-WPOC	Sub-Surface Mooring	11	1.9962	125.701	Celebes Sea
310	2015	RCO BRIN - IOCAS	ITF-WPOC	CTD	12	2.9645	126.955	Celebes Sea
311	2015	RCO BRIN - IOCAS	ITF-WPOC	CTD	13	3.4295	126.829	Celebes Sea
312	2015	RCO BRIN - IOCAS	ITF-WPOC	CTD	14	4.5023	124.595	Celebes Sea
313	2015	RCO BRIN - IOCAS	ITF-WPOC	CTD	15	3.9977	124.593	Celebes Sea
314	2015	RCO BRIN - IOCAS	ITF-WPOC	CTD	16	3.4989	124.597	Celebes Sea
315	2015	RCO BRIN - IOCAS	ITF-WPOC	CTD	17	2.9997	124.596	Celebes Sea
316	2015	RCO BRIN - IOCAS	ITF-WPOC	CTD	18	2.499	124.601	Celebes Sea
317	2015	RCO BRIN - IOCAS	ITF-WPOC	CTD	19	2.0042	124.601	Celebes Sea
318	2015	IMRO MoMAF - FIO	JUVO (Java Upwelling Variation Observation)	CTD	Juvo-03	-8.005	99.111	Indian Ocean
319	2015	IMRO MoMAF - FIO	JUVO (Java Upwelling Variation Observation)	CTD	Juvo-04	-7.85117	100.5	Indian Ocean
320	2015	IMRO MoMAF - FIO	JUVO (Java Upwelling Variation Observation)	CTD	Juvo-05	-7.70867	100.999	Indian Ocean
321	2015	IMRO MoMAF - FIO	JUVO (Java Upwelling Variation Observation)	CTD	Juvo-08	-7.25017	102.5	Indian Ocean
322	2015	IMRO MoMAF - FIO	JUVO (Java Upwelling Variation Observation)	CTD	Juvo-11	-6.90317	103.661	Indian Ocean
323	2015	IMRO MoMAF - FIO	JUVO (Java Upwelling Variation Observation)	CTD	Juvo-13	-6.703	104.326	Indian Ocean
324	2015	IMRO MoMAF - FIO	JUVO (Java Upwelling Variation Observation)	CTD	Juvo-01	-8.5005	106.742	South of Java
325	2015	IMRO MoMAF - FIO	JUVO (Java Upwelling Variation Observation)	CTD	Juvo-15	-6.50333	104.994	Sunda Strait
326	2015	IMRO MoMAF - FIO	JUVO (Java Upwelling Variation Observation)	CTD	Juvo-16	-6.14333	105.374	Sunda Strait
327	2015	IMRO MoMAF - LDEO CU	MITF (Monitoring Indonesian Through Flow)	CTD	ctd_1	-2.8005	118.719	Makassar Strait
328	2015	IMRO MoMAF - LDEO CU	MITF (Monitoring Indonesian Through Flow)	CTD	ctd_2	-2.8005	118.598	Makassar Strait
329	2015	IMRO MoMAF - LDEO CU	MITF (Monitoring Indonesian Through Flow)	CTD	ctd_3	-2.80183	118.398	Makassar Strait
330	2015	IMRO MoMAF - LDEO CU	MITF (Monitoring Indonesian Through Flow)	CTD	ctd_4	-2.802	118.299	Makassar Strait
331	2015	IMRO MoMAF - LDEO CU	MITF (Monitoring Indonesian Through Flow)	CTD	ctd_5	-2.49983	118.25	Makassar Strait
332	2015	IMRO MoMAF - LDEO CU	MITF (Monitoring Indonesian Through Flow)	CTD	ctd_6	-2.501	118.598	Makassar Strait
333	2015	IMRO MoMAF - LDEO CU	MITF (Monitoring Indonesian Through Flow)	CTD	ctd_7	-3.50183	118.498	Makassar Strait
334	2015	IMRO MoMAF - LDEO CU	MITF (Monitoring Indonesian Through Flow)	CTD	ctd_9	-4.0005	118.499	Makassar Strait
335	2015	IMRO MoMAF - LDEO CU	MITF (Monitoring Indonesian Through Flow)	CTD	ctd_10	-4	118.999	Makassar Strait
336	2015	IMRO MoMAF - LDEO CU	MITF (Monitoring Indonesian Through Flow)	CTD	ctd_11	-4.50217	118.006	Makassar Strait
337	2015	IMRO MoMAF - LDEO CU	MITF (Monitoring Indonesian Through Flow)	CTD	ctd_12	-4.5015	118.748	Makassar Strait
338	2015	IMRO MoMAF - LDEO CU	MITF (Monitoring Indonesian Through Flow)	CTD	ctd_13	-4.99917	118.75	Makassar Strait
339	2015	IMRO MoMAF - FIO - UMD	SITE (The South China Sea – Indonesian Seas Transport/Exchange)	TRBM (Trawl Resistance Bottom Mounted)	S_West	-5.81872	105.836	Sunda Strait
340	2015	IMRO MoMAF - FIO - UMD	SITE (The South China Sea – Indonesian Seas Transport/Exchange)	TRBM (Trawl Resistance Bottom Mounted)	S_East	-5.88332	105.948	Sunda Strait
341	2015	IMRO MoMAF - FIO - UMD	SITE (The South China Sea – Indonesian Seas Transport/Exchange)	CTD	KRAKATAU2	-6.122	105.41	Sunda Strait
342	2015	IMRO MoMAF - FIO - UMD	SITE (The South China Sea – Indonesian Seas Transport/Exchange)	CTD	SWEST	-5.83317	105.854	Sunda Strait
343	2015	IMRO MoMAF - FIO - UMD	SITE (The South China Sea – Indonesian Seas Transport/Exchange)	CTD	SEAST	-5.884	105.951	Sunda Strait
344	2015	IMRO MoMAF - FIO - UMD	SITE (The South China Sea – Indonesian Seas Transport/Exchange)	CTD	STA17	-6.12517	105.753	Sunda Strait
345	2015	IMRO MoMAF - FIO - UMD	SITE (The South China Sea – Indonesian Seas Transport/Exchange)	CTD	SEAST	-6.012	105.593	Sunda Strait
346	2015	IMRO MoMAF - FIO - UMD	SITE (The South China Sea – Indonesian Seas Transport/Exchange)	CTD	STA19	-6.15033	105.528	Sunda Strait
347	2015	IMRO MoMAF - FIO - UMD	SITE (The South China Sea – Indonesian Seas Transport/Exchange)	CTD	STA21	-6.021	105.088	Sunda Strait
348	2015	IMRO MoMAF - FIO - UMD	SITE (The South China Sea – Indonesian Seas Transport/Exchange)	CTD	STA22	-6.26483	105.217	Sunda Strait
349	2015	IMRO MoMAF - FIO - UMD	SITE (The South China Sea – Indonesian Seas Transport/Exchange)	CTD	STA23	-6.47467	105.414	Sunda Strait
350	2015	IMRO MoMAF - FIO - UMD	SITE (The South China Sea – Indonesian Seas Transport/Exchange)	CTD	STA26	-5.72783	105.935	Sunda Strait
351	2015	IMRO MoMAF - FIO - UMD	SITE (The South China Sea – Indonesian Seas Transport/Exchange)	TRBM (Trawl Resistance Bottom Mounted)	B2	-2.28325	108.25	Karimata Strait
352	2015	IMRO MoMAF - FIO - UMD	SITE (The South China Sea – Indonesian Seas Transport/Exchange)	TRBM (Trawl Resistance Bottom Mounted)	B3	-1.917	108.55	Karimata Strait
353	2015	IMRO MoMAF - FIO - UMD	SITE (The South China Sea – Indonesian Seas Transport/Exchange)	CTD	B2	-2.2765	108.243	Karimata Strait
354	2015	IMRO MoMAF - FIO - UMD	SITE (The South China Sea – Indonesian Seas Transport/Exchange)	CTD	B3-2	-1.90867	108.535	Karimata Strait
355	2015	IMRO MoMAF - FIO - UMD	SITE (The South China Sea – Indonesian Seas Transport/Exchange)	CTD	B3	-1.91067	108.541	Karimata Strait
356	2015	IMRO MoMAF - FIO - UMD	SITE (The South China Sea – Indonesian Seas Transport/Exchange)	CTD	STA04	-2.39183	108.095	Karimata Strait
357	2015	IMRO MoMAF - FIO - UMD	SITE (The South China Sea – Indonesian Seas Transport/Exchange)	CTD	STA06	-2.076	108.39	Karimata Strait
358	2015	IMRO MoMAF - FIO - UMD	SITE (The South China Sea – Indonesian Seas Transport/Exchange)	CTD	STA08	-1.8215	108.634	Karimata Strait
359	2015	IMRO MoMAF - FIO - UMD	SITE (The South China Sea – Indonesian Seas Transport/Exchange)	CTD	STA09	-1.40083	109.058	Karimata Strait
360	2015	IMRO MoMAF - FIO - UMD	SITE (The South China Sea – Indonesian Seas Transport/Exchange)	TRBM (Trawl Resistance Bottom Mounted)	B1	-2.78142	107.159	Bangka Belitung
361	2015	IMRO MoMAF - FIO - UMD	SITE (The South China Sea – Indonesian Seas Transport/Exchange)	TRBM (Trawl Resistance Bottom Mounted)	B4	-2.87	107.258	Bangka Belitung
362	2015	IMRO MoMAF - FIO - UMD	SITE (The South China Sea – Indonesian Seas Transport/Exchange)	CTD	B1	-2.57683	107.249	Bangka Belitung
363	2015	IMRO MoMAF - FIO - UMD	SITE (The South China Sea – Indonesian Seas Transport/Exchange)	CTD	STA03	-2.57883	107.485	Bangka Belitung
364	2015	IMRO MoMAF - FIO - UMD	SITE (The South China Sea – Indonesian Seas Transport/Exchange)	CTD	STA10	-3.12583	106.993	Bangka Belitung
365	2015	IMRO MoMAF - FIO - UMD	SITE (The South China Sea – Indonesian Seas Transport/Exchange)	CTD	STA11	-3.0655	107.257	Bangka Belitung
366	2015	IMRO MoMAF - FIO - UMD	SITE (The South China Sea – Indonesian Seas Transport/Exchange)	CTD	STA12-B	-5.463	106.586	Java Sea
367	2015	IMRO MoMAF - FIO - UMD	SITE (The South China Sea – Indonesian Seas Transport/Exchange)	CTD	STA13	-4.41	107.04	Java Sea
368	2015	IMRO MoMAF - FIO - UMD	SITE (The South China Sea – Indonesian Seas Transport/Exchange)	CTD	STA14	-5.088	107.022	Java Sea
369	2015	IMRO MoMAF - FIO - UMD	SITE (The South China Sea – Indonesian Seas Transport/Exchange)	CTD	STA15	-5.00383	106.853	Java Sea
370	2015	IMRO MoMAF - FIO - UMD	SITE (The South China Sea – Indonesian Seas Transport/Exchange)	CTD	STA16	-5.31417	106.975	Java Sea
371	2015	IMRO MoMAF - FIO - UMD	SITE (The South China Sea – Indonesian Seas Transport/Exchange)	CTD	STA27	-5.49933	106.067	Java Sea
372	2015	IMRO MoMAF - FIO - UMD	SITE (The South China Sea – Indonesian Seas Transport/Exchange)	CTD	STA28	-5.29133	106.424	Java Sea
373	2015	IMRO MoMAF - FIO - UMD	SITE (The South China Sea – Indonesian Seas Transport/Exchange)	CTD	STA29 - B	-4.7475	107.02	Java Sea
374	2015	IMRO MoMAF - FIO - UMD	SITE (The South China Sea – Indonesian Seas Transport/Exchange)	CTD	STA30	-4.05733	107.035	Java Sea
375	2015	IMRO MoMAF - FIO - UMD	SITE (The South China Sea – Indonesian Seas Transport/Exchange)	CTD	STA31	-3.48117	106.976	Java Sea
376	2015	RDCMCR MoMAF - FIO	TIMIT (The Transport, Internal Waves and Mixing In The Indonesian Throughflow Region and Its Impact on Marine Ecosystem)	CTD	TIMIT 23	-6.54082	114.481	Java Sea
377	2015	RDCMCR MoMAF - FIO	TIMIT (The Transport, Internal Waves and Mixing In The Indonesian Throughflow Region and Its Impact on Marine Ecosystem)	CTD	TIMIT 24	-6.28982	111.485	Java Sea
378	2015	RDCMCR MoMAF - FIO	TIMIT (The Transport, Internal Waves and Mixing In The Indonesian Throughflow Region and Its Impact on Marine Ecosystem)	CTD	TIMIT 25	-5.88323	108.907	Java Sea
379	2015	RDCMCR MoMAF - FIO	TIMIT (The Transport, Internal Waves and Mixing In The Indonesian Throughflow Region and Its Impact on Marine Ecosystem)	Sub-Surface Mooring	M1	0.922483	119.265	Makassar Strait
380	2015	RDCMCR MoMAF - FIO	TIMIT (The Transport, Internal Waves and Mixing In The Indonesian Throughflow Region and Its Impact on Marine Ecosystem)	Sub-Surface Mooring	M2	0.7975	119.75	Makassar Strait
381	2015	RDCMCR MoMAF - FIO	TIMIT (The Transport, Internal Waves and Mixing In The Indonesian Throughflow Region and Its Impact on Marine Ecosystem)	CTD	TIMIT 03	1.3367	120.33	Makassar Strait
382	2015	RDCMCR MoMAF - FIO	TIMIT (The Transport, Internal Waves and Mixing In The Indonesian Throughflow Region and Its Impact on Marine Ecosystem)	CTD	MOORING M1	0.931867	119.252	Makassar Strait
383	2015	RDCMCR MoMAF - FIO	TIMIT (The Transport, Internal Waves and Mixing In The Indonesian Throughflow Region and Its Impact on Marine Ecosystem)	CTD	MOORING M2	0.7975	119.75	Makassar Strait
384	2015	RDCMCR MoMAF - FIO	TIMIT (The Transport, Internal Waves and Mixing In The Indonesian Throughflow Region and Its Impact on Marine Ecosystem)	CTD	TIMIT 04	0.004683	119.418	Makassar Strait
385	2015	RDCMCR MoMAF - FIO	TIMIT (The Transport, Internal Waves and Mixing In The Indonesian Throughflow Region and Its Impact on Marine Ecosystem)	CTD	TIMIT 05	0	117.987	Makassar Strait
386	2015	RDCMCR MoMAF - FIO	TIMIT (The Transport, Internal Waves and Mixing In The Indonesian Throughflow Region and Its Impact on Marine Ecosystem)	CTD	TIMIT 06	-0.875867	118.863	Makassar Strait
387	2015	RDCMCR MoMAF - FIO	TIMIT (The Transport, Internal Waves and Mixing In The Indonesian Throughflow Region and Its Impact on Marine Ecosystem)	CTD	TIMIT 07	-0.996483	118	Makassar Strait
388	2015	RDCMCR MoMAF - FIO	TIMIT (The Transport, Internal Waves and Mixing In The Indonesian Throughflow Region and Its Impact on Marine Ecosystem)	CTD	TIMIT 08	-1.99878	118.839	Makassar Strait
389	2015	RDCMCR MoMAF - FIO	TIMIT (The Transport, Internal Waves and Mixing In The Indonesian Throughflow Region and Its Impact on Marine Ecosystem)	CTD	TIMIT 09	-2.00273	118.005	Makassar Strait
390	2015	RDCMCR MoMAF - FIO	TIMIT (The Transport, Internal Waves and Mixing In The Indonesian Throughflow Region and Its Impact on Marine Ecosystem)	CTD	TIMIT 10	-3.00698	118.43	Makassar Strait
391	2015	RDCMCR MoMAF - FIO	TIMIT (The Transport, Internal Waves and Mixing In The Indonesian Throughflow Region and Its Impact on Marine Ecosystem)	CTD	TIMIT 11	-3.99878	118.002	Makassar Strait
392	2015	RDCMCR MoMAF - FIO	TIMIT (The Transport, Internal Waves and Mixing In The Indonesian Throughflow Region and Its Impact on Marine Ecosystem)	CTD	TIMIT 11A	-4.00028	118.498	Makassar Strait
393	2015	RDCMCR MoMAF - FIO	TIMIT (The Transport, Internal Waves and Mixing In The Indonesian Throughflow Region and Its Impact on Marine Ecosystem)	CTD	TIMIT 12	-4.00925	119.002	Makassar Strait
394	2015	RDCMCR MoMAF - FIO	TIMIT (The Transport, Internal Waves and Mixing In The Indonesian Throughflow Region and Its Impact on Marine Ecosystem)	CTD	TIMIT 13	-4.68978	117.249	Makassar Strait
395	2015	RDCMCR MoMAF - FIO	TIMIT (The Transport, Internal Waves and Mixing In The Indonesian Throughflow Region and Its Impact on Marine Ecosystem)	CTD	TIMIT 14	-4.69403	118.756	Makassar Strait
396	2015	RDCMCR MoMAF - FIO	TIMIT (The Transport, Internal Waves and Mixing In The Indonesian Throughflow Region and Its Impact on Marine Ecosystem)	CTD	TIMIT 19	-7.86132	115.365	Bali Sea
397	2015	RDCMCR MoMAF - FIO	TIMIT (The Transport, Internal Waves and Mixing In The Indonesian Throughflow Region and Its Impact on Marine Ecosystem)	Sub-Surface Mooring	L1	-8.41585	115.966	Lombok Strait
398	2015	RDCMCR MoMAF - FIO	TIMIT (The Transport, Internal Waves and Mixing In The Indonesian Throughflow Region and Its Impact on Marine Ecosystem)	CTD	TIMIT 20/L1	-8.41585	115.966	Lombok Strait
399	2015	RDCMCR MoMAF - FIO	TIMIT (The Transport, Internal Waves and Mixing In The Indonesian Throughflow Region and Its Impact on Marine Ecosystem)	CTD	TIMIT 15	-5.9944	116.795	Flores Sea
400	2015	RDCMCR MoMAF - FIO	TIMIT (The Transport, Internal Waves and Mixing In The Indonesian Throughflow Region and Its Impact on Marine Ecosystem)	CTD	TIMIT 16	-5.99973	117.574	Flores Sea
401	2015	RDCMCR MoMAF - FIO	TIMIT (The Transport, Internal Waves and Mixing In The Indonesian Throughflow Region and Its Impact on Marine Ecosystem)	CTD	TIMIT 17	-6.99443	117.249	Flores Sea
402	2015	RDCMCR MoMAF - FIO	TIMIT (The Transport, Internal Waves and Mixing In The Indonesian Throughflow Region and Its Impact on Marine Ecosystem)	CTD	TIMIT 18	-6.99843	116.359	Flores Sea
403	2015	RDCMCR MoMAF - FIO	TIMIT (The Transport, Internal Waves and Mixing In The Indonesian Throughflow Region and Its Impact on Marine Ecosystem)	CTD	TIMIT 02	1.50523	122	Celebes Sea
404	2015	IMRO MoMAF - LDEO CU	MITF (Monitoring Indonesian Through Flow)	CTD	MAK	-2.86138	118.465	Makassar Strait
405	2016	RCO BRIN - IOCAS	ITF-WPOC	CTD	83	1.5	119.6	Makassar Strait
406	2016	RCO BRIN - IOCAS	ITF-WPOC	CTD	84	1	119.6	Makassar Strait
407	2016	RCO BRIN - IOCAS	ITF-WPOC	CTD	85	0.5	119.6	Makassar Strait
408	2016	RCO BRIN - IOCAS	ITF-WPOC	CTD	86	-0.25	119.2	Makassar Strait
409	2016	RCO BRIN - IOCAS	ITF-WPOC	CTD	87	-1	118.8	Makassar Strait
410	2016	RCO BRIN - IOCAS	ITF-WPOC	CTD	88	-2	118.75	Makassar Strait
411	2016	RCO BRIN - IOCAS	ITF-WPOC	Sub-Surface Mooring	89	-2.858	118.628	Makassar Strait
412	2016	RCO BRIN - IOCAS	ITF-WPOC	CTD	3	-8.837	119.229	Savu Sea
413	2016	RCO BRIN - IOCAS	ITF-WPOC	CTD	4	-9.046	119.237	Savu Sea
414	2016	RCO BRIN - IOCAS	ITF-WPOC	CTD	5	-9.256	119.245	Savu Sea
415	2016	RCO BRIN - IOCAS	ITF-WPOC	CTD	6	-10.28	121.199	Savu Sea
416	2016	RCO BRIN - IOCAS	ITF-WPOC	CTD	7	-10.317	121.383	Savu Sea
417	2016	RCO BRIN - IOCAS	ITF-WPOC	CTD	8	-10.27	121.631	Savu Sea
418	2016	RCO BRIN - IOCAS	ITF-WPOC	CTD	9	-10.584	122.065	Savu Sea
419	2016	RCO BRIN - IOCAS	ITF-WPOC	CTD	10	-10.663	122.234	Savu Sea
420	2016	RCO BRIN - IOCAS	ITF-WPOC	CTD	11	-10.716	122.399	Savu Sea
421	2016	RCO BRIN - IOCAS	ITF-WPOC	CTD	12	-11.1159	123	Savu Sea
422	2016	RCO BRIN - IOCAS	ITF-WPOC	Sub-Surface Mooring	13	-11.251	123	Savu Sea
423	2016	RCO BRIN - IOCAS	ITF-WPOC	CTD	14	-11.4043	123	Savu Sea
424	2016	RCO BRIN - IOCAS	ITF-WPOC	CTD	15	-9	124.525	Savu Sea
425	2016	RCO BRIN - IOCAS	ITF-WPOC	CTD	16	-8.84	124.525	Savu Sea
426	2016	RCO BRIN - IOCAS	ITF-WPOC	CTD	17	-8.66	124.525	Savu Sea
427	2016	RCO BRIN - IOCAS	ITF-WPOC	CTD	18	-8.5	124.525	Savu Sea
428	2016	RCO BRIN - IOCAS	ITF-WPOC	CTD	1	-6	116.811	Flores Sea
429	2016	RCO BRIN - IOCAS	ITF-WPOC	CTD	2	-6	119.385	Flores Sea
430	2016	RCO BRIN - IOCAS	ITF-WPOC	CTD	19	-4.6	124.1	Banda Sea
431	2016	RCO BRIN - IOCAS	ITF-WPOC	CTD	20	-4	124.7	Banda Sea
432	2016	RCO BRIN - IOCAS	ITF-WPOC	CTD	21	-3.4	125.3	Banda Sea
433	2016	RCO BRIN - IOCAS	ITF-WPOC	CTD	22	-2.8	126	Ceram Sea
434	2016	RCO BRIN - IOCAS	ITF-WPOC	Sub-Surface Mooring	23	-1.8	126.8	Ceram Sea
435	2016	RCO BRIN - IOCAS	ITF-WPOC	CTD	28	-1.8	128.17	Ceram Sea
436	2016	RCO BRIN - IOCAS	ITF-WPOC	CTD	29	-1.8	128.47	Ceram Sea
437	2016	RCO BRIN - IOCAS	ITF-WPOC	CTD	30	-1.8	128.77	Ceram Sea
438	2016	RCO BRIN - IOCAS	ITF-WPOC	CTD	31	-1.8	129.07	Ceram Sea
439	2016	RCO BRIN - IOCAS	ITF-WPOC	CTD	32	-1.8	129.37	Ceram Sea
440	2016	RCO BRIN - IOCAS	ITF-WPOC	CTD	24	-1.2	127.7	Halmahera Sea
441	2016	RCO BRIN - IOCAS	ITF-WPOC	CTD	25	-1.1	127.7	Halmahera Sea
442	2016	RCO BRIN - IOCAS	ITF-WPOC	CTD	26	-1	127.7	Halmahera Sea
443	2016	RCO BRIN - IOCAS	ITF-WPOC	CTD	27	-0.9	127.7	Halmahera Sea
444	2016	RCO BRIN - IOCAS	ITF-WPOC	CTD	33	-1.333	129.15	Halmahera Sea
445	2016	RCO BRIN - IOCAS	ITF-WPOC	CTD	34	-0.8	128.97	Halmahera Sea
446	2016	RCO BRIN - IOCAS	ITF-WPOC	CTD	35	-0.3	128.78	Halmahera Sea
447	2016	RCO BRIN - IOCAS	ITF-WPOC	CTD	36	0.2	128.6	Halmahera Sea
448	2016	RCO BRIN - IOCAS	ITF-WPOC	CTD	37	0.13	128.76	Halmahera Sea
449	2016	RCO BRIN - IOCAS	ITF-WPOC	CTD	38	0.05	128.92	Halmahera Sea
450	2016	RCO BRIN - IOCAS	ITF-WPOC	Sub-Surface Mooring	39	-0.02	129.08	Halmahera Sea
451	2016	RCO BRIN - IOCAS	ITF-WPOC	CTD	40	-0.17	129.29	Halmahera Sea
452	2016	RCO BRIN - IOCAS	ITF-WPOC	CTD	41	-0.333	129.5	Halmahera Sea
453	2016	RCO BRIN - IOCAS	ITF-WPOC	CTD	42	-0.49	129.725	Halmahera Sea
454	2016	RCO BRIN - IOCAS	ITF-WPOC	CTD	43	-0.65	129.95	Halmahera Sea
455	2016	RCO BRIN - IOCAS	ITF-WPOC	CTD	44	-0.9	130.1	Halmahera Sea
456	2016	RCO BRIN - IOCAS	ITF-WPOC	Sub-Surface Mooring	54	2	127.3	Celebes Sea
457	2016	RCO BRIN - IOCAS	ITF-WPOC	CTD	55	2	126.9	Celebes Sea
458	2016	RCO BRIN - IOCAS	ITF-WPOC	Sub-Surface Mooring	56	2	126.5	Celebes Sea
459	2016	RCO BRIN - IOCAS	ITF-WPOC	CTD	57	2	126.1	Celebes Sea
460	2016	RCO BRIN - IOCAS	ITF-WPOC	Sub-Surface Mooring	58	2	125.7	Celebes Sea
461	2016	RCO BRIN - IOCAS	ITF-WPOC	Sub-Surface Mooring	59	2.4	127.5	Celebes Sea
462	2016	RCO BRIN - IOCAS	ITF-WPOC	Sub-Surface Mooring	60	2.962	127.268	Celebes Sea
463	2016	RCO BRIN - IOCAS	ITF-WPOC	Sub-Surface Mooring	61	3.45	127.117	Celebes Sea
464	2016	RCO BRIN - IOCAS	ITF-WPOC	CTD	62	4	126.25	Celebes Sea
465	2016	RCO BRIN - IOCAS	ITF-WPOC	CTD	63	4.5	126.55	Celebes Sea
466	2016	RCO BRIN - IOCAS	ITF-WPOC	CTD	64	4.85	126.33	Celebes Sea
467	2016	RCO BRIN - IOCAS	ITF-WPOC	CTD	65	5.2	126.1	Celebes Sea
468	2016	RCO BRIN - IOCAS	ITF-WPOC	CTD	66	5.03	125.72	Celebes Sea
469	2016	RCO BRIN - IOCAS	ITF-WPOC	CTD	67	4.85	125.35	Celebes Sea
470	2016	RCO BRIN - IOCAS	ITF-WPOC	CTD	68	4.67	124.97	Celebes Sea
471	2016	RCO BRIN - IOCAS	ITF-WPOC	CTD	69	4.5	124.6	Celebes Sea
472	2016	RCO BRIN - IOCAS	ITF-WPOC	CTD	70	4	124.6	Celebes Sea
473	2016	RCO BRIN - IOCAS	ITF-WPOC	CTD	71	3.5	124.6	Celebes Sea
474	2016	RCO BRIN - IOCAS	ITF-WPOC	CTD	72	3	124.6	Celebes Sea
475	2016	RCO BRIN - IOCAS	ITF-WPOC	CTD	73	2.5	124.6	Celebes Sea
476	2016	RCO BRIN - IOCAS	ITF-WPOC	CTD	74	2	124.6	Celebes Sea
477	2016	RCO BRIN - IOCAS	ITF-WPOC	CTD	75	3	123.6	Celebes Sea
478	2016	RCO BRIN - IOCAS	ITF-WPOC	CTD	76	3	122.6	Celebes Sea
479	2016	RCO BRIN - IOCAS	ITF-WPOC	CTD	77	3	121.6	Celebes Sea
480	2016	RCO BRIN - IOCAS	ITF-WPOC	CTD	78	3	120.6	Celebes Sea
481	2016	RCO BRIN - IOCAS	ITF-WPOC	CTD	79	3	119.6	Celebes Sea
482	2016	RCO BRIN - IOCAS	ITF-WPOC	CTD	80	3	118.6	Celebes Sea
483	2016	RCO BRIN - IOCAS	ITF-WPOC	CTD	81	2.5	119.6	Celebes Sea
484	2016	RCO BRIN - IOCAS	ITF-WPOC	CTD	82	2	119.6	Celebes Sea
485	2016	RCO BRIN - IOCAS	ITF-WPOC	CTD	45	-0.45	133.5	Pacific Ocean
486	2016	RCO BRIN - IOCAS	ITF-WPOC	CTD	46	0	133.5	Pacific Ocean
487	2016	RCO BRIN - IOCAS	ITF-WPOC	CTD	47	0.45	133.5	Pacific Ocean
488	2016	RCO BRIN - IOCAS	ITF-WPOC	CTD	48	0.9	133.5	Pacific Ocean
489	2016	RCO BRIN - IOCAS	ITF-WPOC	CTD	49	1.35	133.5	Pacific Ocean
490	2016	RCO BRIN - IOCAS	ITF-WPOC	CTD	50	1.8	133.5	Pacific Ocean
491	2016	RCO BRIN - IOCAS	ITF-WPOC	CTD	51	2.25	133.5	Pacific Ocean
492	2016	RCO BRIN - IOCAS	ITF-WPOC	CTD	52	2.7	133.5	Pacific Ocean
493	2016	RDCMCR MoMAF - FIO	TIMIT (The Transport, Internal Waves and Mixing In The Indonesian Throughflow Region and Its Impact on Marine Ecosystem)	CTD	M1 Mooring	0.951367	119.266	Makassar Strait
494	2016	RDCMCR MoMAF - FIO	TIMIT (The Transport, Internal Waves and Mixing In The Indonesian Throughflow Region and Its Impact on Marine Ecosystem)	CTD	M2 Mooring	0.800733	119.75	Makassar Strait
495	2016	RDCMCR MoMAF - FIO	TIMIT (The Transport, Internal Waves and Mixing In The Indonesian Throughflow Region and Its Impact on Marine Ecosystem)	CTD	M2	0.799183	119.757	Makassar Strait
496	2016	RDCMCR MoMAF - FIO	TIMIT (The Transport, Internal Waves and Mixing In The Indonesian Throughflow Region and Its Impact on Marine Ecosystem)	CTD	SM01	0.00849	119.419	Makassar Strait
497	2016	RDCMCR MoMAF - FIO	TIMIT (The Transport, Internal Waves and Mixing In The Indonesian Throughflow Region and Its Impact on Marine Ecosystem)	CTD	SM02	0.88018	119.867	Makassar Strait
498	2016	RDCMCR MoMAF - FIO	TIMIT (The Transport, Internal Waves and Mixing In The Indonesian Throughflow Region and Its Impact on Marine Ecosystem)	CTD	SM03	-1.9895	118.847	Makassar Strait
499	2016	RDCMCR MoMAF - FIO	TIMIT (The Transport, Internal Waves and Mixing In The Indonesian Throughflow Region and Its Impact on Marine Ecosystem)	CTD	SM04	-3.0043	118.468	Makassar Strait
500	2016	RDCMCR MoMAF - FIO	TIMIT (The Transport, Internal Waves and Mixing In The Indonesian Throughflow Region and Its Impact on Marine Ecosystem)	CTD	SM05	-3.97342	117.999	Makassar Strait
501	2016	RDCMCR MoMAF - FIO	TIMIT (The Transport, Internal Waves and Mixing In The Indonesian Throughflow Region and Its Impact on Marine Ecosystem)	CTD	SM06	-4.69298	117.507	Makassar Strait
502	2016	RDCMCR MoMAF - FIO	TIMIT (The Transport, Internal Waves and Mixing In The Indonesian Throughflow Region and Its Impact on Marine Ecosystem)	CTD	SM10	-7.75445	116.128	Bali Sea
503	2016	RDCMCR MoMAF - FIO	TIMIT (The Transport, Internal Waves and Mixing In The Indonesian Throughflow Region and Its Impact on Marine Ecosystem)	CTD	SM11	-8.41565	115.966	Lombok Strait
504	2016	RDCMCR MoMAF - FIO	TIMIT (The Transport, Internal Waves and Mixing In The Indonesian Throughflow Region and Its Impact on Marine Ecosystem)	CTD	L1 Mooring	-8.41897	115.96	Lombok Strait
505	2016	RDCMCR MoMAF - FIO	TIMIT (The Transport, Internal Waves and Mixing In The Indonesian Throughflow Region and Its Impact on Marine Ecosystem)	CTD	SM07	-5.28041	117.114	Flores Sea
506	2016	RDCMCR MoMAF - FIO	TIMIT (The Transport, Internal Waves and Mixing In The Indonesian Throughflow Region and Its Impact on Marine Ecosystem)	CTD	SM08	-5.9895	116.788	Flores Sea
507	2016	RDCMCR MoMAF - FIO	TIMIT (The Transport, Internal Waves and Mixing In The Indonesian Throughflow Region and Its Impact on Marine Ecosystem)	CTD	SM09	-7.00472	116.363	Flores Sea
508	2016	IMRO MoMAF	IJEP (INDESO Joint Expedition) Cruise	CTD	1	-4.13412	127.626	Banda Sea
509	2016	IMRO MoMAF	IJEP (INDESO Joint Expedition) Cruise	CTD	2	-3.37381	127.34	Ceram Sea
510	2016	IMRO MoMAF	IJEP (INDESO Joint Expedition) Cruise	CTD	3	-1.7202	126.635	Ceram Sea
511	2016	IMRO MoMAF	IJEP (INDESO Joint Expedition) Cruise	CTD	4	-2.20472	126.757	Ceram Sea
512	2016	IMRO MoMAF	IJEP (INDESO Joint Expedition) Cruise	CTD	5	-1.12052	126.661	Celebes Sea
513	2016	IMRO MoMAF	IJEP (INDESO Joint Expedition) Cruise	CTD	6	-0.682043	126.226	Celebes Sea
514	2016	IMRO MoMAF	IJEP (INDESO Joint Expedition) Cruise	CTD	7	-0.304808	125.752	Celebes Sea
515	2016	IMRO MoMAF	IJEP (INDESO Joint Expedition) Cruise	CTD	8	0.326588	125.687	Celebes Sea
516	2016	IMRO MoMAF	IJEP (INDESO Joint Expedition) Cruise	CTD	9	0.973055	126.192	Celebes Sea
517	2016	IMRO MoMAF	IJEP (INDESO Joint Expedition) Cruise	CTD	10	1.60438	126.59	Celebes Sea
518	2016	IMRO MoMAF	IJEP (INDESO Joint Expedition) Cruise	CTD	11	2.99617	124.343	Celebes Sea
519	2016	IMRO MoMAF	IJEP (INDESO Joint Expedition) Cruise	CTD	12	3.16889	123.74	Celebes Sea
520	2016	IMRO MoMAF	IJEP (INDESO Joint Expedition) Cruise	CTD	13	3.76825	123.335	Celebes Sea
521	2016	IMRO MoMAF	IJEP (INDESO Joint Expedition) Cruise	CTD	14	4.07706	124.476	Celebes Sea
522	2016	IMRO MoMAF	IJEP (INDESO Joint Expedition) Cruise	CTD	15	4.04225	125.436	Celebes Sea
523	2016	IMRO MoMAF	IJEP (INDESO Joint Expedition) Cruise	CTD	16	3.70508	125.979	Celebes Sea
524	2016	IMRO MoMAF	IJEP (INDESO Joint Expedition) Cruise	CTD	17	2.69355	126.352	Celebes Sea
525	2016	IMRO MoMAF	IJEP (INDESO Joint Expedition) Cruise	CTD	18	2.89393	125.004	Celebes Sea
526	2016	IMRO MoMAF	IJEP (INDESO Joint Expedition) Cruise	CTD	19	1.84092	125.322	Celebes Sea
527	2016	IMRO MoMAF	PDL (Ocean Dynamic Prediction)	CTD	1	-7.5251	122.929	Banda Sea
528	2016	IMRO MoMAF	PDL (Ocean Dynamic Prediction)	CTD	2	-7.03645	124.859	Banda Sea
529	2016	IMRO MoMAF	PDL (Ocean Dynamic Prediction)	CTD	3	-6.84578	126.492	Banda Sea
530	2016	IMRO MoMAF	PDL (Ocean Dynamic Prediction)	CTD	4	-6.17473	126.494	Banda Sea
531	2016	IMRO MoMAF	PDL (Ocean Dynamic Prediction)	CTD	5	-5.52897	126.495	Banda Sea
532	2016	IMRO MoMAF	PDL (Ocean Dynamic Prediction)	CTD	6	-4.82986	126.49	Banda Sea
533	2016	IMRO MoMAF	PDL (Ocean Dynamic Prediction)	CTD	7	-4.80954	127.446	Banda Sea
534	2016	IMRO MoMAF	PDL (Ocean Dynamic Prediction)	CTD	8	-4.77607	128.401	Banda Sea
535	2016	IMRO MoMAF	PDL (Ocean Dynamic Prediction)	CTD	9	-5.44612	128.395	Banda Sea
536	2016	IMRO MoMAF	PDL (Ocean Dynamic Prediction)	CTD	10	-6.07081	128.393	Banda Sea
537	2016	IMRO MoMAF	PDL (Ocean Dynamic Prediction)	CTD	11	-6.61357	128.394	Banda Sea
538	2016	IMRO MoMAF	PDL (Ocean Dynamic Prediction)	CTD	12	-6.5741	129.556	Banda Sea
539	2016	IMRO MoMAF	PDL (Ocean Dynamic Prediction)	CTD	13	-6.50226	130.397	Banda Sea
540	2016	IMRO MoMAF	PDL (Ocean Dynamic Prediction)	CTD	14	-5.92858	130.395	Banda Sea
541	2016	IMRO MoMAF	PDL (Ocean Dynamic Prediction)	CTD	15	-5.24721	130.401	Banda Sea
542	2016	IMRO MoMAF	PDL (Ocean Dynamic Prediction)	CTD	16	-4.65302	130.4	Banda Sea
543	2016	IMRO MoMAF	PDL (Ocean Dynamic Prediction)	CTD	17	-4.67998	129.407	Banda Sea
544	2016	IMRO MoMAF	PDL (Ocean Dynamic Prediction)	CTD	18	-4.0578	128.396	Banda Sea
545	2016	IMRO MoMAF - FIO - UMD	SITE (The South China Sea – Indonesian Seas Transport/Exchange) & JUVO (Java Upwelling Variation Observation)	CTD	JUV Mooring	-8.50472	106.754	South of Java
546	2016	IMRO MoMAF - FIO - UMD	SITE (The South China Sea – Indonesian Seas Transport/Exchange) & JUVO (Java Upwelling Variation Observation)	CTD	19	-8.52116	106.864	South of Java
547	2016	IMRO MoMAF - FIO - UMD	SITE (The South China Sea – Indonesian Seas Transport/Exchange) & JUVO (Java Upwelling Variation Observation)	CTD	20	-7.61631	106.876	South of Java
548	2016	IMRO MoMAF - FIO - UMD	SITE (The South China Sea – Indonesian Seas Transport/Exchange) & JUVO (Java Upwelling Variation Observation)	CTD	21	-7.84804	106.864	South of Java
549	2016	IMRO MoMAF - FIO - UMD	SITE (The South China Sea – Indonesian Seas Transport/Exchange) & JUVO (Java Upwelling Variation Observation)	CTD	S1 TRBM	-5.81852	105.836	Sunda Strait
550	2016	IMRO MoMAF - FIO - UMD	SITE (The South China Sea – Indonesian Seas Transport/Exchange) & JUVO (Java Upwelling Variation Observation)	CTD	17	-5.82222	105.837	Sunda Strait
551	2016	IMRO MoMAF - FIO - UMD	SITE (The South China Sea – Indonesian Seas Transport/Exchange) & JUVO (Java Upwelling Variation Observation)	CTD	18	-5.88185	105.949	Sunda Strait
552	2016	IMRO MoMAF - FIO - UMD	SITE (The South China Sea – Indonesian Seas Transport/Exchange) & JUVO (Java Upwelling Variation Observation)	CTD	22	-6.80033	105.102	Sunda Strait
553	2016	IMRO MoMAF - FIO - UMD	SITE (The South China Sea – Indonesian Seas Transport/Exchange) & JUVO (Java Upwelling Variation Observation)	CTD	23	-6.54012	105.412	Sunda Strait
554	2016	IMRO MoMAF - FIO - UMD	SITE (The South China Sea – Indonesian Seas Transport/Exchange) & JUVO (Java Upwelling Variation Observation)	CTD	24	-6.34895	105.602	Sunda Strait
555	2016	IMRO MoMAF - FIO - UMD	SITE (The South China Sea – Indonesian Seas Transport/Exchange) & JUVO (Java Upwelling Variation Observation)	CTD	25	-6.08373	105.8	Sunda Strait
556	2016	IMRO MoMAF - FIO - UMD	SITE (The South China Sea – Indonesian Seas Transport/Exchange) & JUVO (Java Upwelling Variation Observation)	CTD	26	-5.82984	106.021	Sunda Strait
557	2016	IMRO MoMAF - FIO - UMD	SITE (The South China Sea – Indonesian Seas Transport/Exchange) & JUVO (Java Upwelling Variation Observation)	CTD	B2 TRBM	-2.27635	108.246	Karimata Strait
558	2016	IMRO MoMAF - FIO - UMD	SITE (The South China Sea – Indonesian Seas Transport/Exchange) & JUVO (Java Upwelling Variation Observation)	CTD	B3 TRBM	-1.9105	108.562	Karimata Strait
559	2016	IMRO MoMAF - FIO - UMD	SITE (The South China Sea – Indonesian Seas Transport/Exchange) & JUVO (Java Upwelling Variation Observation)	CTD	6	-2.13028	107.999	Karimata Strait
560	2016	IMRO MoMAF - FIO - UMD	SITE (The South China Sea – Indonesian Seas Transport/Exchange) & JUVO (Java Upwelling Variation Observation)	CTD	7	-1.90644	108.535	Karimata Strait
561	2016	IMRO MoMAF - FIO - UMD	SITE (The South China Sea – Indonesian Seas Transport/Exchange) & JUVO (Java Upwelling Variation Observation)	CTD	8	-2.13114	108.405	Karimata Strait
562	2016	IMRO MoMAF - FIO - UMD	SITE (The South China Sea – Indonesian Seas Transport/Exchange) & JUVO (Java Upwelling Variation Observation)	CTD	9	-2.27167	108.239	Karimata Strait
563	2016	IMRO MoMAF - FIO - UMD	SITE (The South China Sea – Indonesian Seas Transport/Exchange) & JUVO (Java Upwelling Variation Observation)	CTD	B1 TRBM	-2.57693	107.251	Bangka Belitung
564	2016	IMRO MoMAF - FIO - UMD	SITE (The South China Sea – Indonesian Seas Transport/Exchange) & JUVO (Java Upwelling Variation Observation)	CTD	B4 TRBM	-2.57643	107.014	Bangka Belitung
565	2016	IMRO MoMAF - FIO - UMD	SITE (The South China Sea – Indonesian Seas Transport/Exchange) & JUVO (Java Upwelling Variation Observation)	CTD	10	-2.56036	107.014	Bangka Belitung
566	2016	IMRO MoMAF - FIO - UMD	SITE (The South China Sea – Indonesian Seas Transport/Exchange) & JUVO (Java Upwelling Variation Observation)	CTD	11	-2.57524	107.242	Bangka Belitung
567	2016	IMRO MoMAF - FIO - UMD	SITE (The South China Sea – Indonesian Seas Transport/Exchange) & JUVO (Java Upwelling Variation Observation)	CTD	12	-3.1632	106.988	Bangka Belitung
568	2016	IMRO MoMAF - FIO - UMD	SITE (The South China Sea – Indonesian Seas Transport/Exchange) & JUVO (Java Upwelling Variation Observation)	CTD	1	-5.65551	107.005	Java Sea
569	2016	IMRO MoMAF - FIO - UMD	SITE (The South China Sea – Indonesian Seas Transport/Exchange) & JUVO (Java Upwelling Variation Observation)	CTD	2	-5.02071	107.498	Java Sea
570	2016	IMRO MoMAF - FIO - UMD	SITE (The South China Sea – Indonesian Seas Transport/Exchange) & JUVO (Java Upwelling Variation Observation)	CTD	3	-4.37455	107.974	Java Sea
571	2016	IMRO MoMAF - FIO - UMD	SITE (The South China Sea – Indonesian Seas Transport/Exchange) & JUVO (Java Upwelling Variation Observation)	CTD	4	-3.77875	108.415	Java Sea
572	2016	IMRO MoMAF - FIO - UMD	SITE (The South China Sea – Indonesian Seas Transport/Exchange) & JUVO (Java Upwelling Variation Observation)	CTD	5	-3.24626	108.816	Java Sea
573	2016	IMRO MoMAF - FIO - UMD	SITE (The South China Sea – Indonesian Seas Transport/Exchange) & JUVO (Java Upwelling Variation Observation)	CTD	13	-3.7709	106.972	Java Sea
574	2016	IMRO MoMAF - FIO - UMD	SITE (The South China Sea – Indonesian Seas Transport/Exchange) & JUVO (Java Upwelling Variation Observation)	CTD	14	-4.50091	106.571	Java Sea
575	2016	IMRO MoMAF - FIO - UMD	SITE (The South China Sea – Indonesian Seas Transport/Exchange) & JUVO (Java Upwelling Variation Observation)	CTD	15	-4.99698	106.368	Java Sea
576	2016	IMRO MoMAF - FIO - UMD	SITE (The South China Sea – Indonesian Seas Transport/Exchange) & JUVO (Java Upwelling Variation Observation)	CTD	16	-5.50057	106.08	Java Sea
577	2016	IMRO MoMAF - FIO - UMD	SITE (The South China Sea – Indonesian Seas Transport/Exchange) & JUVO (Java Upwelling Variation Observation)	CTD	27	-5.83331	106.167	Java Sea
578	2016	IMRO MoMAF - FIO - UMD	SITE (The South China Sea – Indonesian Seas Transport/Exchange) & JUVO (Java Upwelling Variation Observation)	CTD	28	-5.8335	106.414	Java Sea
579	2017	IMRO MoMAF - LDEO CU	MITF (Monitoring Indonesian Through Flow)	CTD	CTD_01	-2.88658	118.602	Makassar Strait
580	2017	IMRO MoMAF - LDEO CU	MITF (Monitoring Indonesian Through Flow)	CTD	CTD_05	-4.50021	118.008	Makassar Strait
581	2017	IMRO MoMAF - LDEO CU	MITF (Monitoring Indonesian Through Flow)	CTD	CTD_06	-4.99017	117.499	Makassar Strait
582	2017	RCO BRIN - IOCAS	ITF-WPOC	CTD	105	-1	118.8	Makassar Strait
583	2017	RCO BRIN - IOCAS	ITF-WPOC	CTD	106	-2	118.75	Makassar Strait
584	2017	RCO BRIN - IOCAS	ITF-WPOC	Sub-Surface Mooring	107	-3.21	118.61	Makassar Strait
585	2017	RCO BRIN - IOCAS	ITF-WPOC	CTD	3	-8.837	119.229	Savu Sea
586	2017	RCO BRIN - IOCAS	ITF-WPOC	CTD	4	-9.046	119.237	Savu Sea
587	2017	RCO BRIN - IOCAS	ITF-WPOC	CTD	5	-9.256	119.245	Savu Sea
588	2017	RCO BRIN - IOCAS	ITF-WPOC	CTD	6	-10.28	121.199	Savu Sea
589	2017	RCO BRIN - IOCAS	ITF-WPOC	Sub-Surface Mooring	7	-10.317	121.383	Savu Sea
590	2017	RCO BRIN - IOCAS	ITF-WPOC	CTD	8	-10.27	121.631	Savu Sea
591	2017	RCO BRIN - IOCAS	ITF-WPOC	CTD	9	-10.584	122.065	Savu Sea
592	2017	RCO BRIN - IOCAS	ITF-WPOC	CTD	10	-10.663	122.234	Savu Sea
593	2017	RCO BRIN - IOCAS	ITF-WPOC	CTD	11	-10.716	122.399	Savu Sea
594	2017	RCO BRIN - IOCAS	ITF-WPOC	CTD	12	-11.116	123	Savu Sea
595	2017	RCO BRIN - IOCAS	ITF-WPOC	Sub-Surface Mooring	13	-11.251	123	Savu Sea
596	2017	RCO BRIN - IOCAS	ITF-WPOC	CTD	14	-11.404	123	Savu Sea
597	2017	RCO BRIN - IOCAS	ITF-WPOC	CTD	15	-9	124.006	Savu Sea
598	2017	RCO BRIN - IOCAS	ITF-WPOC	CTD	16	-8.601	124.85	Savu Sea
599	2017	RCO BRIN - IOCAS	ITF-WPOC	CTD	17	-8.448	125.22	Savu Sea
600	2017	RCO BRIN - IOCAS	ITF-WPOC	CTD	18	-8.386	125.251	Savu Sea
601	2017	RCO BRIN - IOCAS	ITF-WPOC	CTD	19	-8.353	125.265	Savu Sea
602	2017	RCO BRIN - IOCAS	ITF-WPOC	CTD	20	-8.312	125.278	Savu Sea
603	2017	RCO BRIN - IOCAS	ITF-WPOC	CTD	21	-8.27	125.292	Savu Sea
604	2017	RCO BRIN - IOCAS	ITF-WPOC	CTD	22	-8.213	125.309	Savu Sea
605	2017	RCO BRIN - IOCAS	ITF-WPOC	CTD	1	-7.274	117.05	Flores Sea
606	2017	RCO BRIN - IOCAS	ITF-WPOC	CTD	2	-7.932	119.12	Flores Sea
607	2017	RCO BRIN - IOCAS	ITF-WPOC	CTD	23	-7.63	125.267	Banda Sea
608	2017	RCO BRIN - IOCAS	ITF-WPOC	CTD	24	-7.205	125.114	Banda Sea
609	2017	RCO BRIN - IOCAS	ITF-WPOC	CTD	25	-6.781	124.96	Banda Sea
610	2017	RCO BRIN - IOCAS	ITF-WPOC	CTD	26	-6.356	124.807	Banda Sea
611	2017	RCO BRIN - IOCAS	ITF-WPOC	CTD	27	-5.933	124.656	Banda Sea
612	2017	RCO BRIN - IOCAS	ITF-WPOC	CTD	28	-5.543	124.816	Banda Sea
613	2017	RCO BRIN - IOCAS	ITF-WPOC	CTD	29	-5.153	124.976	Banda Sea
614	2017	RCO BRIN - IOCAS	ITF-WPOC	CTD	30	-4.763	125.136	Banda Sea
615	2017	RCO BRIN - IOCAS	ITF-WPOC	CTD	31	-4.373	125.295	Banda Sea
616	2017	RCO BRIN - IOCAS	ITF-WPOC	CTD	32	-3.983	125.455	Banda Sea
617	2017	RCO BRIN - IOCAS	ITF-WPOC	CTD	33	-3.593	125.615	Banda Sea
618	2017	RCO BRIN - IOCAS	ITF-WPOC	CTD	34	-3.235	125.778	Banda Sea
619	2017	RCO BRIN - IOCAS	ITF-WPOC	CTD	35	-2.869	126.039	Ceram Sea
620	2017	RCO BRIN - IOCAS	ITF-WPOC	CTD	36	-2.561	126.54	Ceram Sea
621	2017	RCO BRIN - IOCAS	ITF-WPOC	CTD	37	-2.502	127.076	Ceram Sea
622	2017	RCO BRIN - IOCAS	ITF-WPOC	CTD	38	-2.411	127.601	Ceram Sea
623	2017	RCO BRIN - IOCAS	ITF-WPOC	CTD	39	-2.172	127.433	Ceram Sea
624	2017	RCO BRIN - IOCAS	ITF-WPOC	CTD	40	-1.971	127.241	Ceram Sea
625	2017	RCO BRIN - IOCAS	ITF-WPOC	CTD	41	-1.858	127.053	Ceram Sea
626	2017	RCO BRIN - IOCAS	ITF-WPOC	CTD	42?	-1.838	127.025	Ceram Sea
627	2017	RCO BRIN - IOCAS	ITF-WPOC	CTD	43	-1.818	126.988	Ceram Sea
628	2017	RCO BRIN - IOCAS	ITF-WPOC	CTD	44	-1.795	126.947	Ceram Sea
629	2017	RCO BRIN - IOCAS	ITF-WPOC	CTD	45?	-1.772	126.91	Ceram Sea
630	2017	RCO BRIN - IOCAS	ITF-WPOC	Sub-Surface Mooring	47	-1.701	126.751	Ceram Sea
631	2017	RCO BRIN - IOCAS	ITF-WPOC	CTD	57	-0.97	127.33	Halmahera Sea
632	2017	RCO BRIN - IOCAS	ITF-WPOC	CTD	58	-1.1	127.96	Halmahera Sea
633	2017	RCO BRIN - IOCAS	ITF-WPOC	CTD	59	-1.4	128.47	Halmahera Sea
634	2017	RCO BRIN - IOCAS	ITF-WPOC	CTD	60	-1.23	128.75	Halmahera Sea
635	2017	RCO BRIN - IOCAS	ITF-WPOC	CTD	61	-0.92	128.87	Halmahera Sea
636	2017	RCO BRIN - IOCAS	ITF-WPOC	CTD	62	-0.45	129.1	Halmahera Sea
637	2017	RCO BRIN - IOCAS	ITF-WPOC	CTD	63	-0.22	129.09	Halmahera Sea
638	2017	RCO BRIN - IOCAS	ITF-WPOC	Sub-Surface Mooring	64	0.08	129.12	Halmahera Sea
639	2017	RCO BRIN - IOCAS	ITF-WPOC	CTD	65	0.3	129.15	Halmahera Sea
640	2017	RCO BRIN - IOCAS	ITF-WPOC	Sub-Surface Mooring	66	-0.31	129.7	Halmahera Sea
641	2017	RCO BRIN - IOCAS	ITF-WPOC	CTD	67	-0.7	130.03	Halmahera Sea
642	2017	RCO BRIN - IOCAS	ITF-WPOC	CTD	48	-1.56	126.493	Celebes Sea
643	2017	RCO BRIN - IOCAS	ITF-WPOC	CTD	49	-1.53	125.972	Celebes Sea
644	2017	RCO BRIN - IOCAS	ITF-WPOC	CTD	50	-1.5	125.45	Celebes Sea
645	2017	RCO BRIN - IOCAS	ITF-WPOC	CTD	51	-1	125.25	Celebes Sea
646	2017	RCO BRIN - IOCAS	ITF-WPOC	CTD	52	-0.5	125.05	Celebes Sea
647	2017	RCO BRIN - IOCAS	ITF-WPOC	CTD	53	0	124.96	Celebes Sea
648	2017	RCO BRIN - IOCAS	ITF-WPOC	CTD	54	0.668	125.166	Celebes Sea
649	2017	RCO BRIN - IOCAS	ITF-WPOC	CTD	55	1.34	125.38	Celebes Sea
650	2017	RCO BRIN - IOCAS	ITF-WPOC	CTD	56	-0.75	126.71	Celebes Sea
651	2017	RCO BRIN - IOCAS	ITF-WPOC	CTD	77	2	127.3	Celebes Sea
652	2017	RCO BRIN - IOCAS	ITF-WPOC	CTD	78	2	126.9	Celebes Sea
653	2017	RCO BRIN - IOCAS	ITF-WPOC	Sub-Surface Mooring	79	2	126.5	Celebes Sea
654	2017	RCO BRIN - IOCAS	ITF-WPOC	CTD	80	2	126.1	Celebes Sea
655	2017	RCO BRIN - IOCAS	ITF-WPOC	Sub-Surface Mooring	81	2	125.7	Celebes Sea
656	2017	RCO BRIN - IOCAS	ITF-WPOC	Sub-Surface Mooring	82	2.4	127.5	Celebes Sea
657	2017	RCO BRIN - IOCAS	ITF-WPOC	Sub-Surface Mooring	83	2.96	127.27	Celebes Sea
658	2017	RCO BRIN - IOCAS	ITF-WPOC	Sub-Surface Mooring	84	3.45	127.12	Celebes Sea
659	2017	RCO BRIN - IOCAS	ITF-WPOC	CTD	85	4	126.33	Celebes Sea
660	2017	RCO BRIN - IOCAS	ITF-WPOC	CTD	86	4.7	126.75	Celebes Sea
661	2017	RCO BRIN - IOCAS	ITF-WPOC	CTD	87	4.9	126.75	Celebes Sea
662	2017	RCO BRIN - IOCAS	ITF-WPOC	CTD	88	5.1	126.75	Celebes Sea
663	2017	RCO BRIN - IOCAS	ITF-WPOC	CTD	89	4.95	126.13	Celebes Sea
664	2017	RCO BRIN - IOCAS	ITF-WPOC	CTD	90	4.91	125.66	Celebes Sea
665	2017	RCO BRIN - IOCAS	ITF-WPOC	CTD	91	4.65	125.14	Celebes Sea
666	2017	RCO BRIN - IOCAS	ITF-WPOC	CTD	92	4.5	124.6	Celebes Sea
667	2017	RCO BRIN - IOCAS	ITF-WPOC	CTD	93	4	124.6	Celebes Sea
668	2017	RCO BRIN - IOCAS	ITF-WPOC	CTD	94	3.5	124.6	Celebes Sea
669	2017	RCO BRIN - IOCAS	ITF-WPOC	CTD	95	3	124.6	Celebes Sea
670	2017	RCO BRIN - IOCAS	ITF-WPOC	CTD	96	2.5	124.6	Celebes Sea
671	2017	RCO BRIN - IOCAS	ITF-WPOC	CTD	97	2	124.6	Celebes Sea
672	2017	RCO BRIN - IOCAS	ITF-WPOC	CTD	98	3	123.6	Celebes Sea
673	2017	RCO BRIN - IOCAS	ITF-WPOC	CTD	99	3	122.6	Celebes Sea
674	2017	RCO BRIN - IOCAS	ITF-WPOC	CTD	100	3	121.6	Celebes Sea
675	2017	RCO BRIN - IOCAS	ITF-WPOC	CTD	101	3	120.6	Celebes Sea
676	2017	RCO BRIN - IOCAS	ITF-WPOC	CTD	68	-0.45	133.5	Pacific Ocean
677	2017	RCO BRIN - IOCAS	ITF-WPOC	CTD	69	0	133.5	Pacific Ocean
678	2017	RCO BRIN - IOCAS	ITF-WPOC	CTD	70	0.45	133.5	Pacific Ocean
679	2017	RCO BRIN - IOCAS	ITF-WPOC	CTD	71	0.9	133.5	Pacific Ocean
680	2017	RCO BRIN - IOCAS	ITF-WPOC	CTD	72	1.35	133.5	Pacific Ocean
681	2017	RCO BRIN - IOCAS	ITF-WPOC	CTD	73	1.8	133.5	Pacific Ocean
682	2017	RCO BRIN - IOCAS	ITF-WPOC	CTD	74	2.25	133.5	Pacific Ocean
683	2017	RCO BRIN - IOCAS	ITF-WPOC	CTD	75	2.7	133.5	Pacific Ocean
684	2017	RCO BRIN - IOCAS	ITF-WPOC	CTD	76	3.15	133.5	Pacific Ocean
685	2018	RCO BRIN - IOCAS	ITF-WPOC	CTD	1	-6.6	116.797	Flores Sea
686	2018	RCO BRIN - IOCAS	ITF-WPOC	CTD	2	-6.677	119.873	Flores Sea
687	2018	RCO BRIN - IOCAS	ITF-WPOC	CTD	3	-5.93255	124.656	Banda Sea
688	2018	RCO BRIN - IOCAS	ITF-WPOC	CTD	4	-5.54255	124.816	Banda Sea
689	2018	RCO BRIN - IOCAS	ITF-WPOC	CTD	5	-5.15255	124.976	Banda Sea
690	2018	RCO BRIN - IOCAS	ITF-WPOC	CTD	6	-4.76255	125.136	Banda Sea
691	2018	RCO BRIN - IOCAS	ITF-WPOC	CTD	7	-4.37255	125.295	Banda Sea
692	2018	RCO BRIN - IOCAS	ITF-WPOC	CTD	8	-3.98255	125.455	Banda Sea
693	2018	RCO BRIN - IOCAS	ITF-WPOC	CTD	9	-3.59255	125.615	Banda Sea
694	2018	RCO BRIN - IOCAS	ITF-WPOC	CTD	10	-3.23492	125.778	Banda Sea
695	2018	RCO BRIN - IOCAS	ITF-WPOC	CTD	11	-2.86941	126.039	Ceram Sea
696	2018	RCO BRIN - IOCAS	ITF-WPOC	CTD	12	-2.56059	126.54	Ceram Sea
697	2018	RCO BRIN - IOCAS	ITF-WPOC	CTD	13	-2.50248	127.076	Ceram Sea
698	2018	RCO BRIN - IOCAS	ITF-WPOC	CTD	14	-2.41116	127.601	Ceram Sea
699	2018	RCO BRIN - IOCAS	ITF-WPOC	CTD	15	-2.17208	127.433	Ceram Sea
700	2018	RCO BRIN - IOCAS	ITF-WPOC	CTD	16	-1.97118	127.241	Ceram Sea
701	2018	RCO BRIN - IOCAS	ITF-WPOC	CTD	17	-1.85827	127.053	Ceram Sea
702	2018	RCO BRIN - IOCAS	ITF-WPOC	CTD	18	-1.83835	127.025	Ceram Sea
703	2018	RCO BRIN - IOCAS	ITF-WPOC	CTD	19	-1.81843	126.988	Ceram Sea
704	2018	RCO BRIN - IOCAS	ITF-WPOC	CTD	20	-1.79518	126.947	Ceram Sea
705	2018	RCO BRIN - IOCAS	ITF-WPOC	CTD	21	-1.77194	126.91	Ceram Sea
706	2018	RCO BRIN - IOCAS	ITF-WPOC	CTD	22	-1.75367	126.856	Ceram Sea
707	2018	RCO BRIN - IOCAS	ITF-WPOC	CTD	23	-1.70054	126.751	Ceram Sea
708	2018	RCO BRIN - IOCAS	ITF-WPOC	CTD	25	-0.97	127.33	Halmahera Sea
709	2018	RCO BRIN - IOCAS	ITF-WPOC	CTD	26	-1.1	127.955	Halmahera Sea
710	2018	RCO BRIN - IOCAS	ITF-WPOC	CTD	27	-1.4	128.47	Halmahera Sea
711	2018	RCO BRIN - IOCAS	ITF-WPOC	CTD	28	-1.23122	128.754	Halmahera Sea
712	2018	RCO BRIN - IOCAS	ITF-WPOC	CTD	29	-0.91633	128.874	Halmahera Sea
713	2018	RCO BRIN - IOCAS	ITF-WPOC	CTD	30	-0.4534	129.099	Halmahera Sea
714	2018	RCO BRIN - IOCAS	ITF-WPOC	CTD	31	-0.21841	129.09	Halmahera Sea
715	2018	RCO BRIN - IOCAS	ITF-WPOC	CTD	32	0.083017	129.116	Halmahera Sea
716	2018	RCO BRIN - IOCAS	ITF-WPOC	CTD	33	0.3	129.15	Halmahera Sea
717	2018	RCO BRIN - IOCAS	ITF-WPOC	CTD	34	-0.30688	129.703	Halmahera Sea
718	2018	RCO BRIN - IOCAS	ITF-WPOC	CTD	24	-1.55977	126.493	Celebes Sea
719	2018	RCO BRIN - IOCAS	ITF-WPOC	Sub-Surface Mooring	35	2	125.7	Celebes Sea
720	2018	RCO BRIN - IOCAS	ITF-WPOC	CTD	36	2	126.1	Celebes Sea
721	2018	RCO BRIN - IOCAS	ITF-WPOC	Sub-Surface Mooring	37	2	126.5	Celebes Sea
722	2018	RCO BRIN - IOCAS	ITF-WPOC	CTD	38	2	126.9	Celebes Sea
723	2018	RCO BRIN - IOCAS	ITF-WPOC	Sub-Surface Mooring	39	2	127.3	Celebes Sea
724	2018	RCO BRIN - IOCAS	ITF-WPOC	Sub-Surface Mooring	40	2.4	127.5	Celebes Sea
725	2018	RCO BRIN - IOCAS	ITF-WPOC	CTD	41	2.96198	127.268	Celebes Sea
726	2018	RCO BRIN - IOCAS	ITF-WPOC	Sub-Surface Mooring	42	3.45	127.117	Celebes Sea
727	2018	RCO BRIN - IOCAS	ITF-WPOC	CTD	43	4	126.333	Celebes Sea
728	2018	RCO BRIN - IOCAS	ITF-WPOC	CTD	44	4.7	126.75	Celebes Sea
729	2018	RCO BRIN - IOCAS	ITF-WPOC	CTD	45	4.9	126.75	Celebes Sea
730	2018	RCO BRIN - IOCAS	ITF-WPOC	Sub-Surface Mooring	46	5.1	126.75	Celebes Sea
731	2018	RCO BRIN - IOCAS	ITF-WPOC	CTD	47	4.95	126.13	Celebes Sea
732	2018	RCO BRIN - IOCAS	ITF-WPOC	CTD	48	4.90567	125.658	Celebes Sea
733	2018	RCO BRIN - IOCAS	ITF-WPOC	CTD	49	4.65	125.137	Celebes Sea
734	2018	RCO BRIN - IOCAS	ITF-WPOC	CTD	50	4.5	124.6	Celebes Sea
735	2018	RCO BRIN - IOCAS	ITF-WPOC	CTD	51	4	124.6	Celebes Sea
736	2018	RCO BRIN - IOCAS	ITF-WPOC	CTD	52	3.5	124.6	Celebes Sea
737	2018	RCO BRIN - IOCAS	ITF-WPOC	CTD	53	3	124.6	Celebes Sea
738	2018	RCO BRIN - IOCAS	ITF-WPOC	CTD	54	2.5	124.6	Celebes Sea
739	2018	RCO BRIN - IOCAS	ITF-WPOC	CTD	55	2	124.6	Celebes Sea
740	2018	RCDS LIPI - FIO - UMD	TRIUMPH (Transport of Indonesian Seas, Upwelling and Mixing Physics)	Surface Mooring	RAMA Buoy	-8	99.56	Indian Ocean
741	2018	RCDS LIPI - FIO - UMD	TRIUMPH (Transport of Indonesian Seas, Upwelling and Mixing Physics)	CTD	TRIUMPH18_01B	-7.991	99.982	Indian Ocean
742	2018	RCDS LIPI - FIO - UMD	TRIUMPH (Transport of Indonesian Seas, Upwelling and Mixing Physics)	Sub-Surface Mooring	JUVO1-2018	-8.591	106.773	South of Java
743	2018	RCDS LIPI - FIO - UMD	TRIUMPH (Transport of Indonesian Seas, Upwelling and Mixing Physics)	Sub-Surface Mooring	JUVO2-2018	-8.882	113.867	South of Java
744	2018	RCDS LIPI - FIO - UMD	TRIUMPH (Transport of Indonesian Seas, Upwelling and Mixing Physics)	CTD	TRIUMPH18_02	-8.585	106.767	South of Java
745	2018	RCDS LIPI - FIO - UMD	TRIUMPH (Transport of Indonesian Seas, Upwelling and Mixing Physics)	CTD	TRIUMPH18_03	-8.06	106.955	South of Java
746	2018	RCDS LIPI - FIO - UMD	TRIUMPH (Transport of Indonesian Seas, Upwelling and Mixing Physics)	CTD	TRIUMPH18_04	-7.818	107.108	South of Java
747	2018	RCDS LIPI - FIO - UMD	TRIUMPH (Transport of Indonesian Seas, Upwelling and Mixing Physics)	CTD	TRIUMPH18_05	-7.575	107.251	South of Java
748	2018	RCDS LIPI - FIO - UMD	TRIUMPH (Transport of Indonesian Seas, Upwelling and Mixing Physics)	CTD	TRIUMPH18_06	-10.47	113.167	South of Java
749	2018	RCDS LIPI - FIO - UMD	TRIUMPH (Transport of Indonesian Seas, Upwelling and Mixing Physics)	CTD	TRIUMPH18_07	-9.921	113.374	South of Java
750	2018	RCDS LIPI - FIO - UMD	TRIUMPH (Transport of Indonesian Seas, Upwelling and Mixing Physics)	CTD	TRIUMPH18_08	-9.592	113.522	South of Java
751	2018	RCDS LIPI - FIO - UMD	TRIUMPH (Transport of Indonesian Seas, Upwelling and Mixing Physics)	CTD	TRIUMPH18_09	-9.182	113.711	South of Java
752	2018	RCDS LIPI - FIO - UMD	TRIUMPH (Transport of Indonesian Seas, Upwelling and Mixing Physics)	CTD	TRIUMPH18_10	-8.746	113.897	South of Java
753	2018	RCDS LIPI - FIO - UMD	TRIUMPH (Transport of Indonesian Seas, Upwelling and Mixing Physics)	CTD	TRIUMPH18_11	-8.913	114.322	South of Java
754	2018	RCDS LIPI - FIO - UMD	TRIUMPH (Transport of Indonesian Seas, Upwelling and Mixing Physics)	CTD	TRIUMPH18_12	-8.818	114.867	Bali Strait
755	2018	RCDS LIPI - FIO - UMD	TRIUMPH (Transport of Indonesian Seas, Upwelling and Mixing Physics)	CTD	TRIUMPH18_13	-8.671	114.757	Bali Strait
756	2018	RCDS LIPI - FIO - UMD	TRIUMPH (Transport of Indonesian Seas, Upwelling and Mixing Physics)	TRBM (Trawl Resistance Bottom Mounted)	TRBM Bali	8.099	114.425	South China Sea
757	2019	RCDS LIPI - FIO - UMD	TRIUMPH (Transport of Indonesian Seas, Upwelling and Mixing Physics)	Surface Mooring	RAMA Buoy	-8.06418	99.95	Indian Ocean
758	2019	RCDS LIPI - FIO - UMD	TRIUMPH (Transport of Indonesian Seas, Upwelling and Mixing Physics)	CTD	5_Sts2	-6.75289	104.076	Indian Ocean
759	2019	RCDS LIPI - FIO - UMD	TRIUMPH (Transport of Indonesian Seas, Upwelling and Mixing Physics)	CTD	6_Sts3	-7.01954	103.324	Indian Ocean
760	2019	RCDS LIPI - FIO - UMD	TRIUMPH (Transport of Indonesian Seas, Upwelling and Mixing Physics)	CTD	7_Sts4	-7.37585	102.251	Indian Ocean
761	2019	RCDS LIPI - FIO - UMD	TRIUMPH (Transport of Indonesian Seas, Upwelling and Mixing Physics)	CTD	8_Sts5	-7.582	101.256	Indian Ocean
762	2019	RCDS LIPI - FIO - UMD	TRIUMPH (Transport of Indonesian Seas, Upwelling and Mixing Physics)	CTD	9_Sts6	-7.99974	99.893	Indian Ocean
763	2019	RCDS LIPI - FIO - UMD	TRIUMPH (Transport of Indonesian Seas, Upwelling and Mixing Physics)	Sub-Surface Mooring	JUVO1-2019	-8.58393	106.769	South of Java
764	2019	RCDS LIPI - FIO - UMD	TRIUMPH (Transport of Indonesian Seas, Upwelling and Mixing Physics)	Sub-Surface Mooring	JUVO2-2019	-8.89598	113.974	South of Java
765	2019	RCDS LIPI - FIO - UMD	TRIUMPH (Transport of Indonesian Seas, Upwelling and Mixing Physics)	CTD	10_Sts9	-8.58299	106.757	South of Java
766	2019	RCDS LIPI - FIO - UMD	TRIUMPH (Transport of Indonesian Seas, Upwelling and Mixing Physics)	CTD	11_Sts10	-8.3434	107.237	South of Java
767	2019	RCDS LIPI - FIO - UMD	TRIUMPH (Transport of Indonesian Seas, Upwelling and Mixing Physics)	CTD	12_Sts11	-8.14688	107.618	South of Java
768	2019	RCDS LIPI - FIO - UMD	TRIUMPH (Transport of Indonesian Seas, Upwelling and Mixing Physics)	CTD	13_Sts12	-8.01749	107.974	South of Java
769	2019	RCDS LIPI - FIO - UMD	TRIUMPH (Transport of Indonesian Seas, Upwelling and Mixing Physics)	CTD	14_Sts13	-8.51891	109.919	South of Java
770	2019	RCDS LIPI - FIO - UMD	TRIUMPH (Transport of Indonesian Seas, Upwelling and Mixing Physics)	CTD	15_Sts21-GJ4	-8.90756	114.196	South of Java
771	2019	RCDS LIPI - FIO - UMD	TRIUMPH (Transport of Indonesian Seas, Upwelling and Mixing Physics)	CTD	1_Sts73	-5.95254	105.796	Sunda Strait
772	2019	RCDS LIPI - FIO - UMD	TRIUMPH (Transport of Indonesian Seas, Upwelling and Mixing Physics)	CTD	2_Sts74	-6.12872	105.525	Sunda Strait
773	2019	RCDS LIPI - FIO - UMD	TRIUMPH (Transport of Indonesian Seas, Upwelling and Mixing Physics)	CTD	3_Sts75	-6.26718	105.271	Sunda Strait
774	2019	RCDS LIPI - FIO - UMD	TRIUMPH (Transport of Indonesian Seas, Upwelling and Mixing Physics)	CTD	4_Sts1	-6.45489	104.895	Sunda Strait
775	2019	RCDS LIPI - FIO - UMD	TRIUMPH (Transport of Indonesian Seas, Upwelling and Mixing Physics)	Sub-Surface Mooring	M2-2019	0.792033	119.748	Makassar Strait
776	2019	RCDS LIPI - FIO - UMD	TRIUMPH (Transport of Indonesian Seas, Upwelling and Mixing Physics)	Sub-Surface Mooring	M1-2019	0.955467	119.269	Makassar Strait
777	2019	RCDS LIPI - FIO - UMD	TRIUMPH (Transport of Indonesian Seas, Upwelling and Mixing Physics)	CTD	Sts_TRIUMPH19_45	-4.87737	117.22	Makassar Strait
778	2019	RCDS LIPI - FIO - UMD	TRIUMPH (Transport of Indonesian Seas, Upwelling and Mixing Physics)	CTD	Sts_TRIUMPH19_46	-4.50171	117.648	Makassar Strait
779	2019	RCDS LIPI - FIO - UMD	TRIUMPH (Transport of Indonesian Seas, Upwelling and Mixing Physics)	CTD	Sts_TRIUMPH19_47	-4.03461	118	Makassar Strait
780	2019	RCDS LIPI - FIO - UMD	TRIUMPH (Transport of Indonesian Seas, Upwelling and Mixing Physics)	CTD	Sts_TRIUMPH19_48	-3.5453	118.546	Makassar Strait
781	2019	RCDS LIPI - FIO - UMD	TRIUMPH (Transport of Indonesian Seas, Upwelling and Mixing Physics)	CTD	Sts_TRIUMPH19_49	-3.00908	118.519	Makassar Strait
782	2019	RCDS LIPI - FIO - UMD	TRIUMPH (Transport of Indonesian Seas, Upwelling and Mixing Physics)	CTD	Sts_TRIUMPH19_50	-1.99979	118.833	Makassar Strait
783	2019	RCDS LIPI - FIO - UMD	TRIUMPH (Transport of Indonesian Seas, Upwelling and Mixing Physics)	CTD	Sts_TRIUMPH19_51	-1.05553	118.985	Makassar Strait
784	2019	RCDS LIPI - FIO - UMD	TRIUMPH (Transport of Indonesian Seas, Upwelling and Mixing Physics)	CTD	Sts_TRIUMPH19_52	-0.000257	119.416	Makassar Strait
785	2019	RCDS LIPI - FIO - UMD	TRIUMPH (Transport of Indonesian Seas, Upwelling and Mixing Physics)	CTD	Sts_TRIUMPH19_57	0.727262	119.996	Makassar Strait
786	2019	RCDS LIPI - FIO - UMD	TRIUMPH (Transport of Indonesian Seas, Upwelling and Mixing Physics)	CTD	Sts_TRIUMPH19_Dompal	0.843133	120.115	Makassar Strait
787	2019	RCDS LIPI - FIO - UMD	TRIUMPH (Transport of Indonesian Seas, Upwelling and Mixing Physics)	CTD	Sts_TRIUMPH19_56	0.752652	119.723	Makassar Strait
788	2019	RCDS LIPI - FIO - UMD	TRIUMPH (Transport of Indonesian Seas, Upwelling and Mixing Physics)	CTD	Sts_TRIUMPH19_55	0.874172	119.508	Makassar Strait
789	2019	RCDS LIPI - FIO - UMD	TRIUMPH (Transport of Indonesian Seas, Upwelling and Mixing Physics)	CTD	Sts_TRIUMPH19_53	1.0276	119.023	Makassar Strait
790	2019	RCDS LIPI - FIO - UMD	TRIUMPH (Transport of Indonesian Seas, Upwelling and Mixing Physics)	CTD	Sts_TRIUMPH19_54	0.949933	119.267	Makassar Strait
791	2019	RCDS LIPI - FIO - UMD	TRIUMPH (Transport of Indonesian Seas, Upwelling and Mixing Physics)	CTD	Sts_TRIUMPH19_Sangata	0.225513	117.795	Makassar Strait
792	2019	RCDS LIPI - FIO - UMD	TRIUMPH (Transport of Indonesian Seas, Upwelling and Mixing Physics)	CTD	Sts_TRIUMPH19_Balikpapan	-1.74064	117.417	Makassar Strait
793	2019	RCDS LIPI - FIO - UMD	TRIUMPH (Transport of Indonesian Seas, Upwelling and Mixing Physics)	CTD	Sts_TRIUMPH19_39	-8.00009	116.007	Bali Sea
794	2019	RCDS LIPI - FIO - UMD	TRIUMPH (Transport of Indonesian Seas, Upwelling and Mixing Physics)	CTD	Sts_TRIUMPH19_40	-7.51703	116.189	Bali Sea
795	2019	RCDS LIPI - FIO - UMD	TRIUMPH (Transport of Indonesian Seas, Upwelling and Mixing Physics)	TRBM	TRBMBali_2019	-8.10968	114.421	Bali Strait
796	2019	RCDS LIPI - FIO - UMD	TRIUMPH (Transport of Indonesian Seas, Upwelling and Mixing Physics)	Sub-Surface Mooring	L1-2019	-8.40552	115.799	Lombok Strait
797	2019	RCDS LIPI - FIO - UMD	TRIUMPH (Transport of Indonesian Seas, Upwelling and Mixing Physics)	Sub-Surface Mooring	L2-2019	-8.4136	115.889	Lombok Strait
798	2019	RCDS LIPI - FIO - UMD	TRIUMPH (Transport of Indonesian Seas, Upwelling and Mixing Physics)	TRBM	TRBMBadung_2019	-8.69837	115.308	Lombok Strait
799	2019	RCDS LIPI - FIO - UMD	TRIUMPH (Transport of Indonesian Seas, Upwelling and Mixing Physics)	CTD	Sts_TRIUMPH19_33	-9.05434	115.617	Lombok Strait
800	2019	RCDS LIPI - FIO - UMD	TRIUMPH (Transport of Indonesian Seas, Upwelling and Mixing Physics)	CTD	Sts_TRIUMPH19_36	-8.63861	115.655	Lombok Strait
801	2019	RCDS LIPI - FIO - UMD	TRIUMPH (Transport of Indonesian Seas, Upwelling and Mixing Physics)	CTD	Sts_TRIUMPH19_38	-8.421	115.959	Lombok Strait
802	2019	RCDS LIPI - FIO - UMD	TRIUMPH (Transport of Indonesian Seas, Upwelling and Mixing Physics)	CTD	16_Sts22	-8.96266	114.679	South of Bali
803	2019	RCDS LIPI - FIO - UMD	TRIUMPH (Transport of Indonesian Seas, Upwelling and Mixing Physics)	CTD	Sts_TRIUMPH19_25	-9.08948	114.895	South of Bali
804	2019	RCDS LIPI - FIO - UMD	TRIUMPH (Transport of Indonesian Seas, Upwelling and Mixing Physics)	CTD	Sts_TRIUMPH19_26	-9.27936	115.235	South of Bali
805	2019	RCDS LIPI - FIO - UMD	TRIUMPH (Transport of Indonesian Seas, Upwelling and Mixing Physics)	CTD	Sts_TRIUMPH19_27	-9.47751	115.589	South of Bali
806	2019	RCDS LIPI - FIO - UMD	TRIUMPH (Transport of Indonesian Seas, Upwelling and Mixing Physics)	TRBM	TRBMAlas_2019	-8.87018	116.671	Lombok Waters
807	2019	RCDS LIPI - FIO - UMD	TRIUMPH (Transport of Indonesian Seas, Upwelling and Mixing Physics)	CTD	Sts_TRIUMPH19_28	-9.32798	116.051	Lombok Waters
808	2019	RCDS LIPI - FIO - UMD	TRIUMPH (Transport of Indonesian Seas, Upwelling and Mixing Physics)	CTD	Sts_TRIUMPH19_29	-9.16666	116.397	Lombok Waters
809	2019	RCDS LIPI - FIO - UMD	TRIUMPH (Transport of Indonesian Seas, Upwelling and Mixing Physics)	CTD	Sts_TRIUMPH19_30	-8.87106	116.668	Lombok Waters
810	2019	RCDS LIPI - FIO - UMD	TRIUMPH (Transport of Indonesian Seas, Upwelling and Mixing Physics)	CTD	Sts_TRIUMPH19_31	-9.01297	116.416	Lombok Waters
811	2019	RCDS LIPI - FIO - UMD	TRIUMPH (Transport of Indonesian Seas, Upwelling and Mixing Physics)	CTD	Sts_TRIUMPH19_32	-9.01163	116.077	Lombok Waters
812	2019	RCDS LIPI - FIO - UMD	TRIUMPH (Transport of Indonesian Seas, Upwelling and Mixing Physics)	CTD	Sts_TRIUMPH19_41	-6.99994	116.368	Flores Sea
813	2019	RCDS LIPI - FIO - UMD	TRIUMPH (Transport of Indonesian Seas, Upwelling and Mixing Physics)	CTD	Sts_TRIUMPH19_42	-6.51856	116.617	Flores Sea
814	2019	RCDS LIPI - FIO - UMD	TRIUMPH (Transport of Indonesian Seas, Upwelling and Mixing Physics)	CTD	Sts_TRIUMPH19_43	-5.99969	116.832	Flores Sea
815	2019	RCDS LIPI - FIO - UMD	TRIUMPH (Transport of Indonesian Seas, Upwelling and Mixing Physics)	CTD	Sts_TRIUMPH19_44	-5.48696	117.064	Flores Sea
816	2021	RCDS BRIN - FIO - UMD	TRIUMPH (Transport of Indonesian Seas, Upwelling and Mixing Physics)	Sub-Surface Mooring	M1_2021	0.954083	119.269	Makassar Strait
817	2021	RCDS BRIN - FIO - UMD	TRIUMPH (Transport of Indonesian Seas, Upwelling and Mixing Physics)	CTD	1_CTDToliToli	0.992	120.522	Makassar Strait
818	2021	RCDS BRIN - FIO - UMD	TRIUMPH (Transport of Indonesian Seas, Upwelling and Mixing Physics)	CTD	2_CTD01	0.73124	119.963	Makassar Strait
819	2021	RCDS BRIN - FIO - UMD	TRIUMPH (Transport of Indonesian Seas, Upwelling and Mixing Physics)	CTD	3_CTD02	0.74016	119.694	Makassar Strait
820	2021	RCDS BRIN - FIO - UMD	TRIUMPH (Transport of Indonesian Seas, Upwelling and Mixing Physics)	CTD	4_CTD03	0.87224	119.504	Makassar Strait
821	2021	RCDS BRIN - FIO - UMD	TRIUMPH (Transport of Indonesian Seas, Upwelling and Mixing Physics)	CTD	5_CTD05	1.01684	119.05	Makassar Strait
822	2021	RCDS BRIN - FIO - UMD	TRIUMPH (Transport of Indonesian Seas, Upwelling and Mixing Physics)	CTD	6_CTD04	0.95066	119.262	Makassar Strait
823	2021	RCDS BRIN - FIO - UMD	TRIUMPH (Transport of Indonesian Seas, Upwelling and Mixing Physics)	CTD	7_CTD06	-0.00016	119.417	Makassar Strait
824	2021	RCDS BRIN - FIO - UMD	TRIUMPH (Transport of Indonesian Seas, Upwelling and Mixing Physics)	CTD	8_CTD07	-1.05951	118.99	Makassar Strait
825	2021	RCDS BRIN - FIO - UMD	TRIUMPH (Transport of Indonesian Seas, Upwelling and Mixing Physics)	CTD	9_CTD08	-1.99406	118.836	Makassar Strait
826	2021	RCDS BRIN - FIO - UMD	TRIUMPH (Transport of Indonesian Seas, Upwelling and Mixing Physics)	CTD	10_CTD09	-2.67992	118.725	Makassar Strait
827	2021	RCDS BRIN - FIO - UMD	TRIUMPH (Transport of Indonesian Seas, Upwelling and Mixing Physics)	CTD	11_CTD10	-2.67222	118.486	Makassar Strait
828	2021	RCDS BRIN - FIO - UMD	TRIUMPH (Transport of Indonesian Seas, Upwelling and Mixing Physics)	CTD	12_CTD11	-2.67392	118.279	Makassar Strait
829	2021	RCDS BRIN - FIO - UMD	TRIUMPH (Transport of Indonesian Seas, Upwelling and Mixing Physics)	CTD	13_CTD12	-3.07459	118.472	Makassar Strait
830	2021	RCDS BRIN - FIO - UMD	TRIUMPH (Transport of Indonesian Seas, Upwelling and Mixing Physics)	CTD	14_CTD13	-3.07402	118.573	Makassar Strait
831	2021	RCDS BRIN - FIO - UMD	TRIUMPH (Transport of Indonesian Seas, Upwelling and Mixing Physics)	CTD	15_CTD14	-3.08468	118.694	Makassar Strait
832	2021	RCDS BRIN - FIO - UMD	TRIUMPH (Transport of Indonesian Seas, Upwelling and Mixing Physics)	CTD	16_CTD15	-3.53478	118.564	Makassar Strait
833	2021	RCDS BRIN - FIO - UMD	TRIUMPH (Transport of Indonesian Seas, Upwelling and Mixing Physics)	CTD	17_CTD16	-3.53488	118.164	Makassar Strait
834	2021	RCDS BRIN - FIO - UMD	TRIUMPH (Transport of Indonesian Seas, Upwelling and Mixing Physics)	CTD	18_CTD17	-4.4979	117.648	Makassar Strait
835	2021	RCDS BRIN - FIO - UMD	TRIUMPH (Transport of Indonesian Seas, Upwelling and Mixing Physics)	CTD	21_CTD20	-7.88514	116.772	Bali Sea
836	2021	RCDS BRIN - FIO - UMD	TRIUMPH (Transport of Indonesian Seas, Upwelling and Mixing Physics)	Sub-Surface Mooring	L1_2021	-8.431	115.802	Lombok Strait
837	2021	RCDS BRIN - FIO - UMD	TRIUMPH (Transport of Indonesian Seas, Upwelling and Mixing Physics)	CTD	25_CTD24	-9.05577	115.637	Lombok Strait
838	2021	RCDS BRIN - FIO - UMD	TRIUMPH (Transport of Indonesian Seas, Upwelling and Mixing Physics)	CTD	26_CTD26	-8.58154	115.934	Lombok Strait
839	2021	RCDS BRIN - FIO - UMD	TRIUMPH (Transport of Indonesian Seas, Upwelling and Mixing Physics)	CTD	27_CTD25	-8.58216	115.778	Lombok Strait
840	2021	RCDS BRIN - FIO - UMD	TRIUMPH (Transport of Indonesian Seas, Upwelling and Mixing Physics)	CTD	28_CTD29	-8.58468	115.629	Lombok Strait
841	2021	RCDS BRIN - FIO - UMD	TRIUMPH (Transport of Indonesian Seas, Upwelling and Mixing Physics)	CTD	29_CTD30	-8.601	115.479	Lombok Strait
842	2021	RCDS BRIN - FIO - UMD	TRIUMPH (Transport of Indonesian Seas, Upwelling and Mixing Physics)	CTD	30_CTD31	-8.69927	115.317	Lombok Strait
843	2021	RCDS BRIN - FIO - UMD	TRIUMPH (Transport of Indonesian Seas, Upwelling and Mixing Physics)	CTD	31_CTD28	-8.40603	115.798	Lombok Strait
844	2021	RCDS BRIN - FIO - UMD	TRIUMPH (Transport of Indonesian Seas, Upwelling and Mixing Physics)	CTD	32_CTD27	-8.42203	115.887	Lombok Strait
845	2021	RCDS BRIN - FIO - UMD	TRIUMPH (Transport of Indonesian Seas, Upwelling and Mixing Physics)	Sub-Surface Mooring	A1_2021	-8.8749	116.67	Lombok Waters
846	2021	RCDS BRIN - FIO - UMD	TRIUMPH (Transport of Indonesian Seas, Upwelling and Mixing Physics)	CTD	22_CTD21	-8.44197	116.789	Lombok Waters
847	2021	RCDS BRIN - FIO - UMD	TRIUMPH (Transport of Indonesian Seas, Upwelling and Mixing Physics)	CTD	23_CTD23	-9.08171	116.568	Lombok Waters
848	2021	RCDS BRIN - FIO - UMD	TRIUMPH (Transport of Indonesian Seas, Upwelling and Mixing Physics)	CTD	24_CTD22	-8.8772	116.67	Lombok Waters
849	2021	RCDS BRIN - FIO - UMD	TRIUMPH (Transport of Indonesian Seas, Upwelling and Mixing Physics)	CTD	19_CTD18	-5.49234	117.098	Flores Sea
850	2021	RCDS BRIN - FIO - UMD	TRIUMPH (Transport of Indonesian Seas, Upwelling and Mixing Physics)	CTD	20_CTD19	-6.52284	116.705	Flores Sea
851	2021	RCO BRIN - IOCAS	ITF-WPOC	CTD	B1	-8.16202	115.747	Bali Sea
852	2021	RCO BRIN - IOCAS	ITF-WPOC	CTD	B1B	-8.64308	115.748	Lombok Strait
853	2021	RCO BRIN - IOCAS	ITF-WPOC	CTD	B2	-8.98308	115.744	Lombok Strait
854	2021	RCO BRIN - IOCAS	ITF-WPOC	Sub-Surface Mooring	TM_OLD	-11.258	122.883	Savu Sea
855	2021	RCO BRIN - IOCAS	ITF-WPOC	CTD	B3	-9.06005	119.892	Savu Sea
856	2021	RCO BRIN - IOCAS	ITF-WPOC	CTD	B4	-10.2433	122.314	Savu Sea
857	2021	RCO BRIN - IOCAS	ITF-WPOC	CTD	B8	-11.2478	122.872	Savu Sea
858	2021	RCO BRIN - IOCAS	ITF-WPOC	CTD	B6	-11.0335	122.105	Savu Sea
859	2021	RCO BRIN - IOCAS	ITF-WPOC	CTD	B5	-10.6712	122.223	Savu Sea
860	2021	RCO BRIN - IOCAS	ITF-WPOC	CTD	B9	-9.03242	124.071	Savu Sea
861	2021	RCO BRIN - IOCAS	ITF-WPOC	CTD	B11	-8.45012	125.25	Savu Sea
862	2021	RCO BRIN - IOCAS	ITF-WPOC	CTD	B12	-8.36172	125.275	Savu Sea
863	2021	RCO BRIN - IOCAS	ITF-WPOC	CTD	B13	-8.31338	125.281	Savu Sea
864	2021	RCO BRIN - IOCAS	ITF-WPOC	CTD	B14	-8.253	125.284	Savu Sea
865	2021	RCO BRIN - IOCAS	ITF-WPOC	CTD	B15	-8.159	125.324	Savu Sea
866	2021	RCO BRIN - IOCAS	ITF-WPOC	CTD	B16	-7.83802	125.25	Banda Sea
867	2021	RCO BRIN - IOCAS	ITF-WPOC	CTD	B17	-7.08185	125.096	Banda Sea
868	2021	RCO BRIN - IOCAS	ITF-WPOC	CTD	B18	-6.00227	124.86	Banda Sea
869	2021	RCO BRIN - IOCAS	ITF-WPOC	CTD	B19	-5.48082	124.808	Banda Sea
870	2021	RCO BRIN - IOCAS	ITF-WPOC	CTD	B20	-5.2994	125.133	Banda Sea
871	2021	RCO BRIN - IOCAS	ITF-WPOC	CTD	B21	-5.04193	125.481	Banda Sea
872	2021	RCO BRIN - IOCAS	ITF-WPOC	CTD	B22	-4.78155	125.853	Banda Sea
873	2021	RCO BRIN - IOCAS	ITF-WPOC	CTD	B23	-4.51953	126.21	Banda Sea
874	2021	RCO BRIN - IOCAS	ITF-WPOC	CTD	B24	-4.11953	126.21	Banda Sea
875	2021	RCO BRIN - IOCAS	ITF-WPOC	CTD	B25	-3.72013	126.21	Banda Sea
876	2021	RCO BRIN - IOCAS	ITF-WPOC	Sub-Surface Mooring	LF01_2021	-1.76125	126.797	Ceram Sea
877	2021	RCO BRIN - IOCAS	ITF-WPOC	Sub-Surface Mooring	LF02_2021	-1.82519	126.965	Ceram Sea
878	2021	RCO BRIN - IOCAS	ITF-WPOC	Sub-Surface Mooring	TH01_2018	-2.40244	127.52	Ceram Sea
879	2021	RCO BRIN - IOCAS	ITF-WPOC	Sub-Surface Mooring	TH03_2018	-3.49427	127.049	Ceram Sea
880	2021	RCO BRIN - IOCAS	ITF-WPOC	Sub-Surface Mooring	M01_2018	-1.99435	125.689	Ceram Sea
881	2021	RCO BRIN - IOCAS	ITF-WPOC	Sub-Surface Mooring	M02_2018	-2.0021	127.497	Ceram Sea
882	2021	RCO BRIN - IOCAS	ITF-WPOC	Sub-Surface Mooring	M03_2018	-2.99189	127.288	Ceram Sea
883	2021	RCO BRIN - IOCAS	ITF-WPOC	Sub-Surface Mooring	M01_2021	-1.98921	125.717	Ceram Sea
884	2021	RCO BRIN - IOCAS	ITF-WPOC	Sub-Surface Mooring	M02_2021	-1.99395	126.5	Ceram Sea
885	2021	RCO BRIN - IOCAS	ITF-WPOC	Sub-Surface Mooring	M03_2021	-1.98297	127.248	Ceram Sea
886	2021	RCO BRIN - IOCAS	ITF-WPOC	CTD	B31	-2.98112	126.099	Ceram Sea
887	2021	RCO BRIN - IOCAS	ITF-WPOC	CTD	B30	-2.89528	126.079	Ceram Sea
888	2021	RCO BRIN - IOCAS	ITF-WPOC	CTD	B29	-2.81323	126.058	Ceram Sea
889	2021	RCO BRIN - IOCAS	ITF-WPOC	CTD	B28	-2.72233	126.04	Ceram Sea
890	2021	RCO BRIN - IOCAS	ITF-WPOC	CTD	B27	-2.63625	126.021	Ceram Sea
891	2021	RCO BRIN - IOCAS	ITF-WPOC	CTD	B26	-2.55318	126.001	Ceram Sea
892	2021	RCO BRIN - IOCAS	ITF-WPOC	CTD	B32	-2.12047	126.696	Ceram Sea
893	2021	RCO BRIN - IOCAS	ITF-WPOC	CTD	B43	-1.68582	126.622	Ceram Sea
894	2021	RCO BRIN - IOCAS	ITF-WPOC	CTD	B42	-1.73743	126.759	Ceram Sea
895	2021	RCO BRIN - IOCAS	ITF-WPOC	CTD	B41	-1.77892	126.859	Ceram Sea
896	2021	RCO BRIN - IOCAS	ITF-WPOC	CTD	B40	-1.7934	126.896	Ceram Sea
897	2021	RCO BRIN - IOCAS	ITF-WPOC	CTD	B39	-1.80467	126.931	Ceram Sea
898	2021	RCO BRIN - IOCAS	ITF-WPOC	CTD	B38	-1.81542	126.962	Ceram Sea
899	2021	RCO BRIN - IOCAS	ITF-WPOC	CTD	B37	-1.84445	127.029	Ceram Sea
900	2021	RCO BRIN - IOCAS	ITF-WPOC	CTD	B36	-1.90105	127.168	Ceram Sea
901	2021	RCO BRIN - IOCAS	ITF-WPOC	CTD	B35	-2.01223	127.284	Ceram Sea
902	2021	RCO BRIN - IOCAS	ITF-WPOC	CTD	B34	-2.26322	127.473	Ceram Sea
903	2021	RCO BRIN - IOCAS	ITF-WPOC	CTD	B33	-2.68213	127.47	Ceram Sea
904	2021	RCO BRIN - IOCAS	ITF-WPOC	CTD	Manipa1	-3.34528	127.417	Ceram Sea
905	2021	RCO BRIN - IOCAS	ITF-WPOC	CTD	H44	-1.64585	127.024	Ceram Sea
906	2021	RCO BRIN - IOCAS	ITF-WPOC	CTD	H45	-1.6648	126.99	Ceram Sea
907	2021	RCO BRIN - IOCAS	ITF-WPOC	CTD	H46	-1.68145	126.957	Ceram Sea
908	2021	RCO BRIN - IOCAS	ITF-WPOC	CTD	H47	-1.69412	126.929	Ceram Sea
909	2021	RCO BRIN - IOCAS	ITF-WPOC	CTD	H48	-1.72028	126.894	Ceram Sea
910	2021	RCO BRIN - IOCAS	ITF-WPOC	CTD	H49	-1.74013	126.865	Ceram Sea
911	2021	RCO BRIN - IOCAS	ITF-WPOC	CTD	H50	-1.76327	126.846	Ceram Sea
912	2021	RCO BRIN - IOCAS	ITF-WPOC	CTD	H51	-1.78095	126.8	Ceram Sea
913	2021	RCO BRIN - IOCAS	ITF-WPOC	CTD	H52	-1.80092	126.767	Ceram Sea
914	2021	RCO BRIN - IOCAS	ITF-WPOC	CTD	H53	-1.82865	126.735	Ceram Sea
915	2021	RCO BRIN - IOCAS	ITF-WPOC	Sub-Surface Mooring	HM01_2018	-0.016995	129.088	Halmahera Sea
916	2021	RCO BRIN - IOCAS	ITF-WPOC	Sub-Surface Mooring	HM02_2018	-0.288547	129.701	Halmahera Sea
917	2021	RCO BRIN - IOCAS	ITF-WPOC	Sub-Surface Mooring	HM02_2021	-0.291618	129.703	Halmahera Sea
918	2021	RCO BRIN - IOCAS	ITF-WPOC	CTD	H56	-0.967867	127.327	Halmahera Sea
919	2021	RCO BRIN - IOCAS	ITF-WPOC	CTD	H57	-1.11463	127.97	Halmahera Sea
920	2021	RCO BRIN - IOCAS	ITF-WPOC	CTD	H58	-1.39782	128.468	Halmahera Sea
921	2021	RCO BRIN - IOCAS	ITF-WPOC	CTD	H59	-1.23117	128.756	Halmahera Sea
922	2021	RCO BRIN - IOCAS	ITF-WPOC	CTD	H60	-0.93235	128.878	Halmahera Sea
923	2021	RCO BRIN - IOCAS	ITF-WPOC	CTD	H61	-0.455933	129.098	Halmahera Sea
924	2021	RCO BRIN - IOCAS	ITF-WPOC	CTD	H62	-0.217533	129.091	Halmahera Sea
925	2021	RCO BRIN - IOCAS	ITF-WPOC	CTD	H64	0.298967	129.151	Halmahera Sea
926	2021	RCO BRIN - IOCAS	ITF-WPOC	CTD	H65	-0.330967	129.703	Halmahera Sea
927	2021	RCO BRIN - IOCAS	ITF-WPOC	CTD	H54	-1.5738	126.313	Celebes Sea
928	2021	RCO BRIN - IOCAS	ITF-WPOC	CTD	H55	-0.752667	126.712	Celebes Sea
929	2021	RCO BRIN - IOCAS	ITF-WPOC	CTD	H66	3.48558	127.089	Celebes Sea
930	2021	RCO BRIN - IOCAS	ITF-WPOC	CTD	H67	2.96112	127.269	Celebes Sea
931	2021	RCO BRIN - IOCAS	ITF-WPOC	CTD	H68	2.39575	127.502	Celebes Sea
932	2021	RCO BRIN - IOCAS	ITF-WPOC	CTD	H69	1.99675	127.293	Celebes Sea
933	2021	RCO BRIN - IOCAS	ITF-WPOC	CTD	H70	1.99417	126.903	Celebes Sea
934	2021	RCO BRIN - IOCAS	ITF-WPOC	CTD	H71	1.9951	126.5	Celebes Sea
935	2021	RCO BRIN - IOCAS	ITF-WPOC	CTD	H72	2.0014	126.1	Celebes Sea
936	2021	RCO BRIN - IOCAS	ITF-WPOC	CTD	H73	1.97042	125.721	Celebes Sea
937	2022	RCDS BRIN - FIO - UMD	TRIUMPH (Transport of Indonesian Seas, Upwelling and Mixing Physics)	CTD	10_CTD04TM	-6.53696	104.387	Indian Ocean
938	2022	RCDS BRIN - FIO - UMD	TRIUMPH (Transport of Indonesian Seas, Upwelling and Mixing Physics)	CTD	11_CTD04	-6.53049	104.375	Indian Ocean
939	2022	RCDS BRIN - FIO - UMD	TRIUMPH (Transport of Indonesian Seas, Upwelling and Mixing Physics)	Sub-Surface Mooring	JUVO1_2022	-7.6807	107.026	South of Java
940	2022	RCDS BRIN - FIO - UMD	TRIUMPH (Transport of Indonesian Seas, Upwelling and Mixing Physics)	CTD	5_CTD37	-8.83577	113.724	South of Java
941	2022	RCDS BRIN - FIO - UMD	TRIUMPH (Transport of Indonesian Seas, Upwelling and Mixing Physics)	CTD	6_CTD37TM	-8.86688	113.727	South of Java
942	2022	RCDS BRIN - FIO - UMD	TRIUMPH (Transport of Indonesian Seas, Upwelling and Mixing Physics)	CTD	7_CTD14	-7.71019	107.077	South of Java
943	2022	RCDS BRIN - FIO - UMD	TRIUMPH (Transport of Indonesian Seas, Upwelling and Mixing Physics)	CTD	8_CTD13TM	-8.1343	106.921	South of Java
944	2022	RCDS BRIN - FIO - UMD	TRIUMPH (Transport of Indonesian Seas, Upwelling and Mixing Physics)	CTD	9_CTD13	-8.12399	106.911	South of Java
945	2022	RCDS BRIN - FIO - UMD	TRIUMPH (Transport of Indonesian Seas, Upwelling and Mixing Physics)	CTD	1_CTD40	-8.42893	114.499	Bali Strait
946	2022	RCDS BRIN - FIO - UMD	TRIUMPH (Transport of Indonesian Seas, Upwelling and Mixing Physics)	CTD	2_CTD39	-8.63434	114.656	Bali Strait
947	2022	RCDS BRIN - FIO - UMD	TRIUMPH (Transport of Indonesian Seas, Upwelling and Mixing Physics)	CTD	3_CTD38TM	-8.85292	114.837	Bali Strait
948	2022	RCDS BRIN - FIO - UMD	TRIUMPH (Transport of Indonesian Seas, Upwelling and Mixing Physics)	CTD	4_CTD38	-8.85338	114.824	Bali Strait
949	2023	RCO BRIN - IOCAS	IMPOLSE	CTD	40	1.4914	119.595	Makassar Strait
950	2023	RCO BRIN - IOCAS	IMPOLSE	CTD	41	0.4988	119.6	Makassar Strait
951	2023	RCO BRIN - IOCAS	IMPOLSE	CTD	42	-0.5837	118.987	Makassar Strait
952	2023	RCO BRIN - IOCAS	IMPOLSE	CTD	43	-1.7935	118.749	Makassar Strait
953	2023	RCO BRIN - IOCAS	IMPOLSE	CTD	44	-3.212	118.608	Makassar Strait
954	2023	RCO BRIN - IOCAS	IMPOLSE	CTD	45	-4	118.6	Makassar Strait
955	2023	RCO BRIN - IOCAS	IMPOLSE	Sub-Surface Mooring	46	-4.8	117.8	Makassar Strait
956	2023	RCO BRIN - IOCAS	IMPOLSE	CTD	1	-8.246	115.856	Bali Sea
957	2023	RCO BRIN - IOCAS	IMPOLSE	Sub-Surface Mooring	2	-8.487	115.787	Lombok Strait
958	2023	RCO BRIN - IOCAS	IMPOLSE	CTD	3	-9.14	118.366	Sumba Waters
959	2023	RCO BRIN - IOCAS	IMPOLSE	CTD	4	-9.41	118.695	Sumba Waters
960	2023	RCO BRIN - IOCAS	IMPOLSE	CTD	5	-10.502	121.143	Savu Sea
961	2023	RCO BRIN - IOCAS	IMPOLSE	CTD	6	-10.827	122.228	Savu Sea
962	2023	RCO BRIN - IOCAS	IMPOLSE	CTD	7	-9.977	122.944	Savu Sea
963	2023	RCO BRIN - IOCAS	IMPOLSE	CTD	8	-8.984	123.836	Savu Sea
964	2023	RCO BRIN - IOCAS	IMPOLSE	CTD	9	-8.245	125.539	Savu Sea
965	2023	RCO BRIN - IOCAS	IMPOLSE	CTD	10	-7.302	125.697	Banda Sea
966	2023	RCO BRIN - IOCAS	IMPOLSE	CTD	11	-6.613	125.982	Banda Sea
967	2023	RCO BRIN - IOCAS	IMPOLSE	CTD	12	-5.822	126.267	Banda Sea
968	2023	RCO BRIN - IOCAS	IMPOLSE	CTD	13	-5	126.551	Banda Sea
969	2023	RCO BRIN - IOCAS	IMPOLSE	CTD	14	-4.213	127.28	Banda Sea
970	2023	RCO BRIN - IOCAS	IMPOLSE	CTD	15	-2.922	127.369	Ceram Sea
971	2023	RCO BRIN - IOCAS	IMPOLSE	CTD	16	-2.408	127.191	Ceram Sea
972	2023	RCO BRIN - IOCAS	IMPOLSE	Sub-Surface Mooring	17	-1.949	126.977	Ceram Sea
973	2023	RCO BRIN - IOCAS	IMPOLSE	CTD	21	-1.802	128.705	Ceram Sea
974	2023	RCO BRIN - IOCAS	IMPOLSE	CTD	20	-1.113	128.06	Halmahera Sea
975	2023	RCO BRIN - IOCAS	IMPOLSE	CTD	22	-0.832	129.191	Halmahera Sea
976	2023	RCO BRIN - IOCAS	IMPOLSE	CTD	23	-0.323	129.216	Halmahera Sea
977	2023	RCO BRIN - IOCAS	IMPOLSE	Sub-Surface Mooring	24	0.044	129.206	Halmahera Sea
978	2023	RCO BRIN - IOCAS	IMPOLSE	Sub-Surface Mooring	18	-1.564	126.505	Celebes Sea
979	2023	RCO BRIN - IOCAS	IMPOLSE	CTD	19	-1.172	126.967	Celebes Sea
980	2023	RCO BRIN - IOCAS	IMPOLSE	CTD	25	1.983	127.248	Celebes Sea
981	2023	RCO BRIN - IOCAS	IMPOLSE	CTD	26	2	126.901	Celebes Sea
982	2023	RCO BRIN - IOCAS	IMPOLSE	Sub-Surface Mooring	27	1.9939	126.5	Celebes Sea
983	2023	RCO BRIN - IOCAS	IMPOLSE	CTD	28	2	126.101	Celebes Sea
984	2023	RCO BRIN - IOCAS	IMPOLSE	Sub-Surface Mooring	29	1.9892	125.717	Celebes Sea
985	2023	RCO BRIN - IOCAS	IMPOLSE	CTD	30	2.0011	124.6	Celebes Sea
986	2023	RCO BRIN - IOCAS	IMPOLSE	CTD	31	2.5	124.601	Celebes Sea
987	2023	RCO BRIN - IOCAS	IMPOLSE	CTD	32	3.0067	124.601	Celebes Sea
988	2023	RCO BRIN - IOCAS	IMPOLSE	CTD	33	3.5006	124.599	Celebes Sea
989	2023	RCO BRIN - IOCAS	IMPOLSE	CTD	34	4.0024	124.594	Celebes Sea
990	2023	RCO BRIN - IOCAS	IMPOLSE	CTD	35	3.0009	123.598	Celebes Sea
991	2023	RCO BRIN - IOCAS	IMPOLSE	CTD	36	2.9951	122.594	Celebes Sea
992	2023	RCO BRIN - IOCAS	IMPOLSE	CTD	37	2.9997	121.6	Celebes Sea
993	2023	RCO BRIN - IOCAS	IMPOLSE	CTD	38	2.9998	120.6	Celebes Sea
994	2023	RCO BRIN - IOCAS	IMPOLSE	CTD	39	2.305	120.03	Celebes Sea
995		BRIN/BPPT/LIPI	Bs1	CTD	1	-8.6	102.333	Indian Ocean
996		BRIN/BPPT/LIPI	Bs1	CTD	2	-8.15	102.767	Indian Ocean
997		BRIN/BPPT/LIPI	Bs1	CTD	3	-7.75	103.167	Indian Ocean
998		BRIN/BPPT/LIPI	Bs1	CTD	4	-7.33333	103.617	Indian Ocean
999		BRIN/BPPT/LIPI	Bs1	CTD	5	-7	103.983	Indian Ocean
1000		BRIN/BPPT/LIPI	Bs1	CTD	6	-6.66667	104.317	Indian Ocean
1001		BRIN/BPPT/LIPI	Bs1	CTD	7	-5.58333	103.5	Indian Ocean
1002		BRIN/BPPT/LIPI	Bs1	CTD	8	-6.15	102.867	Indian Ocean
1003		BRIN/BPPT/LIPI	Bs1	CTD	9	-6.65	102.317	Indian Ocean
1004		BRIN/BPPT/LIPI	Bs1	CTD	10	-7.23333	101.667	Indian Ocean
1005		BRIN/BPPT/LIPI	Bs1	CTD	11	-7.81667	101.05	Indian Ocean
1006		BRIN/BPPT/LIPI	Bs1	CTD	12	-8.4	100.417	Indian Ocean
1007		BRIN/BPPT/LIPI	Bs1	CTD	13	-7.41667	99.7333	Indian Ocean
1008		BRIN/BPPT/LIPI	Bs1	CTD	14	-6.9	99.85	Indian Ocean
1009		BRIN/BPPT/LIPI	Bs1	CTD	15	-6.4	100.367	Indian Ocean
1010		BRIN/BPPT/LIPI	Bs1	CTD	16	-6	100.767	Indian Ocean
1011		BRIN/BPPT/LIPI	Bs1	CTD	17	-5.55	101.2	Indian Ocean
1012		BRIN/BPPT/LIPI	Bs1	CTD	18	-5.16667	101.567	Indian Ocean
1013		BRIN/BPPT/LIPI	Bs1	CTD	19	-3.86667	100.583	Indian Ocean
1014		BRIN/BPPT/LIPI	Bs1	CTD	21	-4.73333	99.7333	Indian Ocean
1015		BRIN/BPPT/LIPI	Bs1	CTD	22	-5.16667	99.3333	Indian Ocean
1016		BRIN/BPPT/LIPI	Bs1	CTD	23	-5.56667	98.9167	Indian Ocean
1017		BRIN/BPPT/LIPI	Bs1	CTD	24	-5.98333	98.4833	Indian Ocean
1018		BRIN/BPPT/LIPI	Enggano	CTD	Station1-01	-5.02778	101.528	Indian Ocean
1019		BRIN/BPPT/LIPI	Enggano	CTD	Station1-02	-5.02667	101.522	Indian Ocean
1020		BRIN/BPPT/LIPI	Enggano	CTD	Station1-03	-5.02778	101.519	Indian Ocean
1021		BRIN/BPPT/LIPI	Enggano	CTD	Station2-01	-5.61111	103.333	Indian Ocean
1022		BRIN/BPPT/LIPI	Enggano	CTD	Station2-02	-5.61167	103.333	Indian Ocean
1023		BRIN/BPPT/LIPI	Enggano	CTD	Station2-03	-5.61167	103.333	Indian Ocean
1024		BRIN/BPPT/LIPI	My Places	CTD	1	-2.83333	99.75	Indian Ocean
1025		BRIN/BPPT/LIPI	My Places	CTD	2	-2.98333	99.5333	Indian Ocean
1026		BRIN/BPPT/LIPI	My Places	CTD	3	-3.13333	99.3333	Indian Ocean
1027		BRIN/BPPT/LIPI	My Places	CTD	4	-3.28333	99.1667	Indian Ocean
1028		BRIN/BPPT/LIPI	My Places	CTD	5	-3.46667	98.9833	Indian Ocean
1029		BRIN/BPPT/LIPI	My Places	CTD	6	-3.63333	98.7833	Indian Ocean
1030		BRIN/BPPT/LIPI	My Places	CTD	7	-3.76667	98.5833	Indian Ocean
1031		BRIN/BPPT/LIPI	My Places	CTD	8	-3.98333	98.3333	Indian Ocean
1032		BRIN/BPPT/LIPI	My Places	CTD	9	-4.2	98.0833	Indian Ocean
1033		BRIN/BPPT/LIPI	My Places	CTD	10	-4.4	97.8167	Indian Ocean
1034		BRIN/BPPT/LIPI	My Places	CTD	11	-3	99.45	Indian Ocean
1035		BRIN/BPPT/LIPI	My Places	CTD	12	-2.76667	92.7667	Indian Ocean
1036		BRIN/BPPT/LIPI	My Places	CTD	13	-2.53333	92.4833	Indian Ocean
1037		BRIN/BPPT/LIPI	My Places	CTD	14	-2.31667	97.2	Indian Ocean
1038		BRIN/BPPT/LIPI	My Places	CTD	15	-2.16667	97.4167	Indian Ocean
1039		BRIN/BPPT/LIPI	My Places	CTD	16	-1.98333	97.5667	Indian Ocean
1040		BRIN/BPPT/LIPI	My Places	CTD	17	-1.9	97.7833	Indian Ocean
1041		BRIN/BPPT/LIPI	My Places	CTD	20	-1.4	98.35	Indian Ocean
1042		BRIN/BPPT/LIPI	My Places	CTD	21	-1.26667	95.4333	Indian Ocean
1043		BRIN/BPPT/LIPI	My Places	CTD	22	-1.05	95.6833	Indian Ocean
1044		BRIN/BPPT/LIPI	My Places	CTD	23	-0.833333	95.9333	Indian Ocean
1045		BRIN/BPPT/LIPI	My Places	CTD	24	-0.616667	96.2	Indian Ocean
1046		BRIN/BPPT/LIPI	My Places	CTD	25	-0.466667	96.3833	Indian Ocean
1047		BRIN/BPPT/LIPI	My Places	CTD	27	-0.133333	96.7667	Indian Ocean
1048		BRIN/BPPT/LIPI	My Places	CTD	28	0.0166667	96.9667	Indian Ocean
1049		BRIN/BPPT/LIPI	My Places	CTD	30	0.316667	97.35	Indian Ocean
1050		BRIN/BPPT/LIPI	My Places #2	CTD	1	-3.13333	99.79	Indian Ocean
1051		BRIN/BPPT/LIPI	My Places #2	CTD	2	-3	99.67	Indian Ocean
1052		BRIN/BPPT/LIPI	My Places #2	CTD	3	-3.79667	99.4433	Indian Ocean
1053		BRIN/BPPT/LIPI	My Places #2	CTD	4	-3.60333	100.617	Indian Ocean
1054		BRIN/BPPT/LIPI	My Places #2	CTD	5	-3.28	98.6967	Indian Ocean
1055		BRIN/BPPT/LIPI	My Places #2	CTD	6	-3.88667	98.6367	Indian Ocean
1056		BRIN/BPPT/LIPI	My Places #2	CTD	7	-3.70333	99.2833	Indian Ocean
1057		BRIN/BPPT/LIPI	My Places #2	CTD	8	-4.37333	99.05	Indian Ocean
1058		BRIN/BPPT/LIPI	My Places #2	CTD	9	-4.97	98.9767	Indian Ocean
1059		BRIN/BPPT/LIPI	My Places #2	CTD	10	-4.28333	97.7167	Indian Ocean
1060		BRIN/BPPT/LIPI	My Places #2	CTD	11	-3.01667	96.5367	Indian Ocean
1061		BRIN/BPPT/LIPI	My Places #2	CTD	12	-2.78972	96.7144	Indian Ocean
1062		BRIN/BPPT/LIPI	My Places #2	CTD	13	-2.44	97.3367	Indian Ocean
1063		BRIN/BPPT/LIPI	My Places #2	CTD	14	-2.57667	97.68	Indian Ocean
1064		BRIN/BPPT/LIPI	My Places #2	CTD	15	-2.36	98.0067	Indian Ocean
1065		BRIN/BPPT/LIPI	My Places #2	CTD	16	-2.45333	97.76	Indian Ocean
1066		BRIN/BPPT/LIPI	My Places #2	CTD	17	-2.14	98.1867	Indian Ocean
1067		BRIN/BPPT/LIPI	My Places #2	CTD	18	-1.54667	98.4567	Indian Ocean
1068		BRIN/BPPT/LIPI	My Places #2	CTD	19	-1.55667	98.9333	Indian Ocean
1069		BRIN/BPPT/LIPI	My Places #2	CTD	20	-1.55667	99.0267	Indian Ocean
1070		BRIN/BPPT/LIPI	My Places #2	CTD	21	-1.64333	95.7767	Indian Ocean
1071		BRIN/BPPT/LIPI	My Places #2	CTD	22	-1.56	95.61	Indian Ocean
1072		BRIN/BPPT/LIPI	My Places #2	CTD	23	-1.43333	96.31	Indian Ocean
1073		BRIN/BPPT/LIPI	My Places #2	CTD	24	-0.846667	96.4367	Indian Ocean
1074		BRIN/BPPT/LIPI	My Places #2	CTD	25	-0.463333	96.98	Indian Ocean
1075		BRIN/BPPT/LIPI	My Places #2	CTD	26	-0.563333	97.1067	Indian Ocean
1076		BRIN/BPPT/LIPI	My Places #2	CTD	27	-0.846667	96.9767	Indian Ocean
1077		BRIN/BPPT/LIPI	My Places #2	CTD	28	0.05	97.2367	Indian Ocean
1078		BRIN/BPPT/LIPI	My Places #2	CTD	29	0.183333	97.2733	Indian Ocean
1079		BRIN/BPPT/LIPI	My Places #2	CTD	30	0.94	98.1333	Indian Ocean
1080		BRIN/BPPT/LIPI	My Places #5	CTD	1	-7.01667	104.583	Indian Ocean
1081		BRIN/BPPT/LIPI	My Places #5	CTD	2	-7.46667	104.15	Indian Ocean
1082		BRIN/BPPT/LIPI	My Places #5	CTD	3	-7.88333	103.717	Indian Ocean
1083		BRIN/BPPT/LIPI	My Places #5	CTD	4	-8.35	103.283	Indian Ocean
1084		BRIN/BPPT/LIPI	My Places #5	CTD	5	-8.81667	102.817	Indian Ocean
1085		BRIN/BPPT/LIPI	My Places #5	CTD	6	-7.75	101.833	Indian Ocean
1086		BRIN/BPPT/LIPI	My Places #5	CTD	7	-7.28333	102.317	Indian Ocean
1087		BRIN/BPPT/LIPI	My Places #5	CTD	8	-6.81667	102.817	Indian Ocean
1088		BRIN/BPPT/LIPI	My Places #5	CTD	9	-6.55	103.267	Indian Ocean
1089		BRIN/BPPT/LIPI	My Places #5	CTD	11	-5.55	101.967	Indian Ocean
1090		BRIN/BPPT/LIPI	My Places #5	CTD	12	-5.98333	101.483	Indian Ocean
1091		BRIN/BPPT/LIPI	My Places #5	CTD	13	-6.43333	101.067	Indian Ocean
1092		BRIN/BPPT/LIPI	My Places #5	CTD	14	-6.88333	100.617	Indian Ocean
1093		BRIN/BPPT/LIPI	My Places #5	CTD	15	-7.33333	100.15	Indian Ocean
1094		BRIN/BPPT/LIPI	My Places #5	CTD	16	-5.98333	99.2833	Indian Ocean
1095		BRIN/BPPT/LIPI	My Places #5	CTD	17	-5.56667	99.6667	Indian Ocean
1096		BRIN/BPPT/LIPI	My Places #5	CTD	18	-5.13333	100.067	Indian Ocean
1097		BRIN/BPPT/LIPI	My Places #5	CTD	19	-4.73333	100.483	Indian Ocean
1098		BRIN/BPPT/LIPI	My Places #5	CTD	20	-4.31667	100.867	Indian Ocean
1099		BRIN/BPPT/LIPI	TFLEX Atlas	CTD	10	7.32933	90.9463	Indian Ocean
1100		BRIN/BPPT/LIPI	TFLEX Atlas	CTD	9	7.251	92.7052	Indian Ocean
1101		BRIN/BPPT/LIPI	TFLEX Atlas	CTD	8	3.9555	89.6705	Indian Ocean
1102		BRIN/BPPT/LIPI	TFLEX Atlas	CTD	7	4.7435	94.077	Indian Ocean
1103		BRIN/BPPT/LIPI	TFLEX Atlas	CTD	6	1.93483	90.5452	Indian Ocean
1104		BRIN/BPPT/LIPI	TFLEX Atlas	CTD	5	-0.0023333	89.8875	Indian Ocean
1105		BRIN/BPPT/LIPI	TFLEX Atlas	CTD	4	-3.40317	90.8408	Indian Ocean
1106		BRIN/BPPT/LIPI	TFLEX Atlas	CTD	3	-6.0095	91.5753	Indian Ocean
1107		BRIN/BPPT/LIPI	TFLEX Atlas	CTD	2	-8.007	92.1243	Indian Ocean
1108		BRIN/BPPT/LIPI	TFLEX Atlas	CTD	1	-10.0102	92.7052	Indian Ocean
1109		BRIN/BPPT/LIPI	My Places #3	CTD	1	-7.53639	105.474	South of Java
1110		BRIN/BPPT/LIPI	My Places #3	CTD	2	-7.99528	105.484	South of Java
1111		BRIN/BPPT/LIPI	My Places #3	CTD	3	-8.51694	105.471	South of Java
1112		BRIN/BPPT/LIPI	My Places #3	CTD	4	-8.98944	105.52	South of Java
1113		BRIN/BPPT/LIPI	My Places #3	CTD	5	-9.5	105.5	South of Java
1114		BRIN/BPPT/LIPI	My Places #3	CTD	6	-10	105.483	South of Java
1115		BRIN/BPPT/LIPI	My Places #3	CTD	7	-10.4833	105.233	South of Java
1116		BRIN/BPPT/LIPI	My Places #3	CTD	8	-11	105.483	South of Java
1117		BRIN/BPPT/LIPI	My Places #3	CTD	9	-8.48333	110	South of Java
1118		BRIN/BPPT/LIPI	My Places #3	CTD	10	-8.98333	110	South of Java
1119		BRIN/BPPT/LIPI	My Places #3	CTD	11	-9.48333	109.983	South of Java
1120		BRIN/BPPT/LIPI	My Places #3	CTD	12	-10	110	South of Java
1121		BRIN/BPPT/LIPI	My Places #3	CTD	13	-10.5	109.967	South of Java
1122		BRIN/BPPT/LIPI	My Places #3	CTD	14	-10.9833	110	South of Java
1123		BRIN/BPPT/LIPI	My Places #3	CTD	15	-11.5	109.983	South of Java
1124		BRIN/BPPT/LIPI	My Places #3	CTD	16	-11.9833	110	South of Java
1125		BRIN/BPPT/LIPI	My Places #3	CTD	17	-8.98333	114.483	South of Java
1126		BRIN/BPPT/LIPI	My Places #3	CTD	18	-9.5	114.5	South of Java
1127		BRIN/BPPT/LIPI	My Places #3	CTD	19	-10	114.483	South of Java
1128		BRIN/BPPT/LIPI	My Places #3	CTD	20	-10.4833	114.483	South of Java
1129		BRIN/BPPT/LIPI	My Places #3	CTD	21	-10.9833	114.483	South of Java
1130		BRIN/BPPT/LIPI	My Places #3	CTD	22	-11.4833	114.5	South of Java
1131		BRIN/BPPT/LIPI	My Places #3	CTD	23	-12	114.5	South of Java
1132		BRIN/BPPT/LIPI	My Places #3	CTD	24	-12.65	114.483	South of Java
1133		BRIN/BPPT/LIPI	My Places #4	CTD	1	-7.48333	105.5	South of Java
1134		BRIN/BPPT/LIPI	My Places #4	CTD	2	-8	105.483	South of Java
1135		BRIN/BPPT/LIPI	My Places #4	CTD	3	-8.48333	105.483	South of Java
1136		BRIN/BPPT/LIPI	My Places #4	CTD	4	-8.98333	105.5	South of Java
1137		BRIN/BPPT/LIPI	My Places #4	CTD	5	-9.48333	105.483	South of Java
1138		BRIN/BPPT/LIPI	My Places #4	CTD	6	-10	105.5	South of Java
1139		BRIN/BPPT/LIPI	My Places #4	CTD	7	-10.5	105.25	South of Java
1140		BRIN/BPPT/LIPI	My Places #4	CTD	8	-11	105.5	South of Java
1141		BRIN/BPPT/LIPI	My Places #4	CTD	9	-11.9833	110	South of Java
1142		BRIN/BPPT/LIPI	My Places #4	CTD	10	-11.4833	110	South of Java
1143		BRIN/BPPT/LIPI	My Places #4	CTD	11	-11	109.983	South of Java
1144		BRIN/BPPT/LIPI	My Places #4	CTD	12	-10.5	110	South of Java
1145		BRIN/BPPT/LIPI	My Places #4	CTD	13	-9.98333	110	South of Java
1146		BRIN/BPPT/LIPI	My Places #4	CTD	14	-9.5	110	South of Java
1147		BRIN/BPPT/LIPI	My Places #4	CTD	15	-9	110	South of Java
1148		BRIN/BPPT/LIPI	My Places #4	CTD	16	-8.48333	110	South of Java
1149		BRIN/BPPT/LIPI	My Places #4	CTD	17	-12.5	114.5	South of Java
1150		BRIN/BPPT/LIPI	My Places #4	CTD	18	-12	114.483	South of Java
1151		BRIN/BPPT/LIPI	My Places #4	CTD	19	-11.4833	114.483	South of Java
1152		BRIN/BPPT/LIPI	My Places #4	CTD	20	-11	114.483	South of Java
1153		BRIN/BPPT/LIPI	My Places #4	CTD	21	-10.5	114.5	South of Java
1154		BRIN/BPPT/LIPI	My Places #4	CTD	22	-10	114.483	South of Java
1155		BRIN/BPPT/LIPI	My Places #4	CTD	23	-9.48333	114.483	South of Java
1156		BRIN/BPPT/LIPI	My Places #4	CTD	24	-9	114.483	South of Java
1157		BRIN/BPPT/LIPI	St. Pameungpeuk	CTD	St. Pameungpeuk	-7.66	107.69	South of Java
1158		BRIN/BPPT/LIPI	St. Baron	CTD	St. Baron	-8.14	110.55	South of Java
1159		BRIN/BPPT/LIPI	N Aceh	CTD	1	5.33333	97.1667	Malacca Strait
1160		BRIN/BPPT/LIPI	N Aceh	CTD	2	6	97	Malacca Strait
1161		BRIN/BPPT/LIPI	N Aceh	CTD	3	5.33333	96.8333	Malacca Strait
1162		BRIN/BPPT/LIPI	N Aceh	CTD	4	6	96.6667	Malacca Strait
1163		BRIN/BPPT/LIPI	N Aceh	CTD	5	5.31667	96.5	Malacca Strait
1164		BRIN/BPPT/LIPI	N Aceh	CTD	6	6	96.3333	Malacca Strait
1165		BRIN/BPPT/LIPI	N Aceh	CTD	7	5.4	96.1667	Malacca Strait
1166		BRIN/BPPT/LIPI	N Aceh	CTD	8	6	96	Malacca Strait
1167		BRIN/BPPT/LIPI	N Aceh	CTD	9	5.58333	95.8333	Malacca Strait
1168		BRIN/BPPT/LIPI	N Aceh	CTD	10	6	95.8333	Malacca Strait
1169		BRIN/BPPT/LIPI	N Aceh	CTD	11	5.66667	95.5	Malacca Strait
1170		BRIN/BPPT/LIPI	N Aceh	CTD	12	5.75	95.3333	Malacca Strait
1171		BRIN/BPPT/LIPI	Post Satal	CTD	CTD05	-5.65038	115.931	Java Sea
1172		BRIN/BPPT/LIPI	Post Satal	CTD	CTD06	-5.65107	113.856	Java Sea
1173		BRIN/BPPT/LIPI	Post Satal	CTD	CTD07	-5.6502	111.374	Java Sea
1174		BRIN/BPPT/LIPI	Post Satal	CTD	CTD08	-5.65492	108.937	Java Sea
1175		BRIN/BPPT/LIPI	Post Satal	CTD	CTD05	-5.65063	115.93	Java Sea
1176		BRIN/BPPT/LIPI	Post Satal	CTD	CTD06	-5.65103	113.856	Java Sea
1177		BRIN/BPPT/LIPI	Post Satal	CTD	CTD07	-5.64988	111.374	Java Sea
1178		BRIN/BPPT/LIPI	Post Satal	CTD	CTD08	-5.65517	108.936	Java Sea
1179		BRIN/BPPT/LIPI	Post Satal	CTD	CTD05	-5.65182	115.929	Java Sea
1180		BRIN/BPPT/LIPI	Post Satal	CTD	CTD06	-5.65107	113.856	Java Sea
1181		BRIN/BPPT/LIPI	Post Satal	CTD	CTD07	-5.64917	111.374	Java Sea
1182		BRIN/BPPT/LIPI	Post Satal	CTD	CTD08	-5.65508	108.935	Java Sea
1183		BRIN/BPPT/LIPI	WOC 2009	CTD	1	-5.61172	112.007	Java Sea
1184		BRIN/BPPT/LIPI	WOC 2009	CTD	2	-5.61712	114.288	Java Sea
1185		BRIN/BPPT/LIPI	WOC 2009	CTD	3	-5.61759	115.257	Java Sea
1186		BRIN/BPPT/LIPI	WOC 2009	CTD	40	-7.4825	115.397	Bali Sea
1187		BRIN/BPPT/LIPI	WOC 2009	CTD	39	-7.81807	117.501	Bali Sea
1188		BRIN/BPPT/LIPI	WOC 2009	CTD	41	-7.49981	114.668	Bali Sea
1189		BRIN/BPPT/LIPI	My Places #3	CTD	25	-9.98333	117.983	Sumba Waters
1190		BRIN/BPPT/LIPI	My Places #3	CTD	26	-10.5	117.983	Sumba Waters
1191		BRIN/BPPT/LIPI	My Places #3	CTD	27	-10.9833	118	Sumba Waters
1192		BRIN/BPPT/LIPI	My Places #3	CTD	28	-11.5	117.983	Sumba Waters
1193		BRIN/BPPT/LIPI	My Places #3	CTD	29	-11.9833	118	Sumba Waters
1194		BRIN/BPPT/LIPI	My Places #4	CTD	25	-11.9833	117.983	Sumba Waters
1195		BRIN/BPPT/LIPI	My Places #4	CTD	26	-11.5	117.983	Sumba Waters
1196		BRIN/BPPT/LIPI	My Places #4	CTD	27	-11	118	Sumba Waters
1197		BRIN/BPPT/LIPI	My Places #4	CTD	28	-10.5	117.983	Sumba Waters
1198		BRIN/BPPT/LIPI	My Places #4	CTD	29	-10	118	Sumba Waters
1199		BRIN/BPPT/LIPI	Irja2	CTD	5	-7.66667	121.317	Flores Sea
1200		BRIN/BPPT/LIPI	Irja2	CTD	3	-7.75	120.667	Flores Sea
1201		BRIN/BPPT/LIPI	Irja2	CTD	2	-7.8	120.333	Flores Sea
1202		BRIN/BPPT/LIPI	Post Satal	CTD	CTD01	-6.24783	119.83	Flores Sea
1203		BRIN/BPPT/LIPI	Post Satal	CTD	CTD02	-5.83022	119.134	Flores Sea
1204		BRIN/BPPT/LIPI	Post Satal	CTD	CTD03	-5.66678	118.167	Flores Sea
1205		BRIN/BPPT/LIPI	Post Satal	CTD	CTD04	-5.63843	116.996	Flores Sea
1206		BRIN/BPPT/LIPI	Post Satal	CTD	CTD01	-6.24732	119.827	Flores Sea
1207		BRIN/BPPT/LIPI	Post Satal	CTD	CTD02	-5.83048	119.135	Flores Sea
1208		BRIN/BPPT/LIPI	Post Satal	CTD	CTD04	-5.64022	116.996	Flores Sea
1209		BRIN/BPPT/LIPI	Post Satal	CTD	CTD01	-6.24217	119.826	Flores Sea
1210		BRIN/BPPT/LIPI	Post Satal	CTD	CTD02	-5.82773	119.137	Flores Sea
1211		BRIN/BPPT/LIPI	Post Satal	CTD	CTD03	-5.67338	118.164	Flores Sea
1212		BRIN/BPPT/LIPI	Post Satal	CTD	CTD04	-5.64148	116.995	Flores Sea
1213		BRIN/BPPT/LIPI	WOC 2009	CTD	4	-5.64621	117.133	Flores Sea
1214		BRIN/BPPT/LIPI	WOC 2009	CTD	5	-5.61692	118.048	Flores Sea
1215		BRIN/BPPT/LIPI	WOC 2009	CTD	6	-5.68687	118.765	Flores Sea
1216		BRIN/BPPT/LIPI	WOC 2009	CTD	7	-5.7239	121.006	Flores Sea
1217		BRIN/BPPT/LIPI	WOC 2009	CTD	8	-5.73801	121.947	Flores Sea
1218		BRIN/BPPT/LIPI	WOC 2009	CTD	37	-7.7226	119.505	Flores Sea
1219		BRIN/BPPT/LIPI	WOC 2009	CTD	38	-7.92432	118.996	Flores Sea
1220		BRIN/BPPT/LIPI	bds	CTD	37	-2.81667	125.683	Banda Sea
1221		BRIN/BPPT/LIPI	bds	CTD	36	-3.5	125.667	Banda Sea
1222		BRIN/BPPT/LIPI	bds	CTD	35	-4.16667	126.083	Banda Sea
1223		BRIN/BPPT/LIPI	bds	CTD	34	-4.06667	126.5	Banda Sea
1224		BRIN/BPPT/LIPI	bds	CTD	33	-4.33333	126.833	Banda Sea
1225		BRIN/BPPT/LIPI	bds	CTD	32	-4.48333	127.517	Banda Sea
1226		BRIN/BPPT/LIPI	bds	CTD	31	-5.01667	128.167	Banda Sea
1227		BRIN/BPPT/LIPI	bds	CTD	30	-4.5	128.833	Banda Sea
1228		BRIN/BPPT/LIPI	bds	CTD	29	-5.03333	129.35	Banda Sea
1229		BRIN/BPPT/LIPI	bds	CTD	28	-5.16667	130.083	Banda Sea
1230		BRIN/BPPT/LIPI	bds	CTD	26	-6.16667	130.85	Banda Sea
1231		BRIN/BPPT/LIPI	bds	CTD	25	-5.48333	131.333	Banda Sea
1232		BRIN/BPPT/LIPI	bds	CTD	15	-7.51667	130.333	Banda Sea
1233		BRIN/BPPT/LIPI	bds	CTD	14	-7.16667	130.517	Banda Sea
1234		BRIN/BPPT/LIPI	bds	CTD	13	-7.08333	131	Banda Sea
1235		BRIN/BPPT/LIPI	bds	CTD	12	-6.66667	131.167	Banda Sea
1236		BRIN/BPPT/LIPI	bds	CTD	11	-6.31667	131.517	Banda Sea
1237		BRIN/BPPT/LIPI	bds	CTD	10	-6.03333	131.667	Banda Sea
1238		BRIN/BPPT/LIPI	bds	CTD	8	-4.66667	131.333	Banda Sea
1239		BRIN/BPPT/LIPI	bds	CTD	7	-4.5	131.167	Banda Sea
1240		BRIN/BPPT/LIPI	bds	CTD	6	-4.16667	130.833	Banda Sea
1241		BRIN/BPPT/LIPI	bds	CTD	5	-4	130.317	Banda Sea
1242		BRIN/BPPT/LIPI	bds	CTD	4	-3.66667	129.65	Banda Sea
1243		BRIN/BPPT/LIPI	bds	CTD	3	-4	129.167	Banda Sea
1244		BRIN/BPPT/LIPI	bds	CTD	2	-4.13333	128.65	Banda Sea
1245		BRIN/BPPT/LIPI	bds	CTD	1	-4.23333	128.067	Banda Sea
1246		BRIN/BPPT/LIPI	Post Satal	CTD	Wak	-5.13118	123.42	Banda Sea
1247		BRIN/BPPT/LIPI	Post Satal	CTD	Wak	-5.1285	123.417	Banda Sea
1248		BRIN/BPPT/LIPI	Post Satal	CTD	Wak	-5.12733	123.416	Banda Sea
1249		BRIN/BPPT/LIPI	TEWS Halm 2009	CTD	3	-5.08889	129.267	Banda Sea
1250		BRIN/BPPT/LIPI	TEWS Halm 2009	CTD	4	-6.24194	125.915	Banda Sea
1251		BRIN/BPPT/LIPI	WOC 2009	CTD	9	-4.99979	123.444	Banda Sea
1252		BRIN/BPPT/LIPI	WOC 2009	CTD	10	-4.02943	123.642	Banda Sea
1253		BRIN/BPPT/LIPI	WOC 2009	CTD	11	-3.01074	123.847	Banda Sea
1254		BRIN/BPPT/LIPI	WOC 2009	CTD	34	-5.35437	128.582	Banda Sea
1255		BRIN/BPPT/LIPI	WOC 2009	CTD	35	-5.99797	126.004	Banda Sea
1256		BRIN/BPPT/LIPI	WOC 2009	CTD	36	-6.76133	122.994	Banda Sea
1257		BRIN/BPPT/LIPI	bds	CTD	19	-8.66667	130.167	Timor Sea
1258		BRIN/BPPT/LIPI	bds	CTD	18	-8.83333	129.333	Timor Sea
1259		BRIN/BPPT/LIPI	bds	CTD	17	-8.83333	128.5	Timor Sea
1260		BRIN/BPPT/LIPI	bds	CTD	16	-8.83333	127.15	Timor Sea
1261		BRIN/BPPT/LIPI	bds	CTD	24	-5	133.667	Arafura Sea
1262		BRIN/BPPT/LIPI	bds	CTD	23	-6	133.317	Arafura Sea
1263		BRIN/BPPT/LIPI	bds	CTD	22	-6.5	132.667	Arafura Sea
1264		BRIN/BPPT/LIPI	bds	CTD	21	-7.5	132	Arafura Sea
1265		BRIN/BPPT/LIPI	bds	CTD	40	-2.5	127.317	Ceram Sea
1266		BRIN/BPPT/LIPI	bds	CTD	39	-2.33333	126.667	Ceram Sea
1267		BRIN/BPPT/LIPI	bds	CTD	38	-2.5	126.15	Ceram Sea
1268		BRIN/BPPT/LIPI	bds	CTD	9	-3.5	131.667	Ceram Sea
1269		BRIN/BPPT/LIPI	WOC 2009	CTD	31	-1.99985	129.086	Ceram Sea
1270		BRIN/BPPT/LIPI	WOC 2009	CTD	32	-2.52707	128.271	Ceram Sea
1271		BRIN/BPPT/LIPI	WOC 2009	CTD	33	-3.00046	127.375	Ceram Sea
1272		BRIN/BPPT/LIPI	Irja2	CTD	1	0.333333	130.5	Halmahera Sea
1273		BRIN/BPPT/LIPI	WOC 2009	CTD	20	-0.911027	127.55	Halmahera Sea
1274		BRIN/BPPT/LIPI	WOC 2009	CTD	21	-0.450118	128.864	Halmahera Sea
1275		BRIN/BPPT/LIPI	WOC 2009	CTD	22	0.498367	129.277	Halmahera Sea
1276		BRIN/BPPT/LIPI	WOC 2009	CTD	23	0.839467	129.41	Halmahera Sea
1277		BRIN/BPPT/LIPI	WOC 2009	CTD	24	0.625686	129.327	Halmahera Sea
1278		BRIN/BPPT/LIPI	WOC 2009	CTD	25	0.577783	129.266	Halmahera Sea
1279		BRIN/BPPT/LIPI	WOC 2009	CTD	26	0.579019	129.308	Halmahera Sea
1280		BRIN/BPPT/LIPI	WOC 2009	CTD	27	0.578869	129.4	Halmahera Sea
1281		BRIN/BPPT/LIPI	WOC 2009	CTD	29	-0.641015	129.176	Halmahera Sea
1282		BRIN/BPPT/LIPI	Post Satal	CTD	H01	0.0141167	125.632	Celebes Sea
1283		BRIN/BPPT/LIPI	Post Satal	CTD	H02	0.311483	125.522	Celebes Sea
1284		BRIN/BPPT/LIPI	Post Satal	CTD	H03	0.998833	125.267	Celebes Sea
1285		BRIN/BPPT/LIPI	Post Satal	CTD	H01	0.0131833	125.634	Celebes Sea
1286		BRIN/BPPT/LIPI	Post Satal	CTD	H02	-0.3095	125.523	Celebes Sea
1287		BRIN/BPPT/LIPI	Post Satal	CTD	H03	-1.00167	125.269	Celebes Sea
1288		BRIN/BPPT/LIPI	Post Satal	CTD	H01	-0.0147833	125.636	Celebes Sea
1289		BRIN/BPPT/LIPI	Post Satal	CTD	H02	0.309167	125.525	Celebes Sea
1290		BRIN/BPPT/LIPI	Post Satal	CTD	H03	0.00486667	125.273	Celebes Sea
1291		BRIN/BPPT/LIPI	TEWS Halm 2009	CTD	1	0.0458333	125.632	Celebes Sea
1292		BRIN/BPPT/LIPI	WOC 2009	CTD	12	-1.02467	124.174	Celebes Sea
1293		BRIN/BPPT/LIPI	WOC 2009	CTD	13	-0.54515	124.483	Celebes Sea
1294		BRIN/BPPT/LIPI	WOC 2009	CTD	14	0.54515	124.652	Celebes Sea
1295		BRIN/BPPT/LIPI	WOC 2009	CTD	15	0.849144	124.75	Celebes Sea
1296		BRIN/BPPT/LIPI	WOC 2009	CTD	16	0.929974	124.957	Celebes Sea
1297		BRIN/BPPT/LIPI	WOC 2009	CTD	17	0.0782858	125.699	Celebes Sea
1298		BRIN/BPPT/LIPI	WOC 2009	CTD	18	0.0785739	126.2	Celebes Sea
1299		BRIN/BPPT/LIPI	WOC 2009	CTD	19	-0.52567	126.745	Celebes Sea
1300		BRIN/BPPT/LIPI	Index Satal	CTD	0	1.9245	124.607	Celebes Sea
1301		BRIN/BPPT/LIPI	Index Satal	CTD	1	2.00183	125.485	Celebes Sea
1302		BRIN/BPPT/LIPI	Index Satal	CTD	2	3.9935	125.821	Celebes Sea
1303		BRIN/BPPT/LIPI	Index Satal	CTD	3	4.80333	125.983	Celebes Sea
1304		BRIN/BPPT/LIPI	Index Satal	CTD	4	4.86717	126.574	Celebes Sea
1305		BRIN/BPPT/LIPI	Index Satal	CTD	5	4.81867	126.79	Celebes Sea
1306		BRIN/BPPT/LIPI	Index Satal	CTD	6	4.27767	125.796	Celebes Sea
1307		BRIN/BPPT/LIPI	Index Satal	CTD	7	4.19867	125.588	Celebes Sea
1308		BRIN/BPPT/LIPI	Index Satal	CTD	8	4.2795	125.482	Celebes Sea
1309		BRIN/BPPT/LIPI	Index Satal	CTD	9	2.8755	125.293	Celebes Sea
1310		BRIN/BPPT/LIPI	Index Satal	CTD	10	2.51683	125.303	Celebes Sea
1311		BRIN/BPPT/LIPI	Index Satal	CTD	11	2.69983	125.287	Celebes Sea
1312		BRIN/BPPT/LIPI	Index Satal	CTD	12	2.24433	125.126	Celebes Sea
1313		BRIN/BPPT/LIPI	Index Satal	CTD	13	1.91217	124.691	Celebes Sea
1314		BRIN/BPPT/LIPI	Index Satal	CTD	14	2.03067	125.025	Celebes Sea
1315		BRIN/BPPT/LIPI	TEWS Halm 2009	CTD	2	4.40833	128.73	Celebes Sea
1316		BRIN/BPPT/LIPI	Irja1	CTD	26	-0.65	131.5	Pacific Ocean
1317		BRIN/BPPT/LIPI	Irja1	CTD	24	-0.15	131.5	Pacific Ocean
1318		BRIN/BPPT/LIPI	Irja1	CTD	23	0.316667	131.5	Pacific Ocean
1319		BRIN/BPPT/LIPI	Irja1	CTD	22	0.816667	131.5	Pacific Ocean
1320		BRIN/BPPT/LIPI	Irja1	CTD	21	1.31667	131.5	Pacific Ocean
1321		BRIN/BPPT/LIPI	Irja1	CTD	20	-0.166667	132.45	Pacific Ocean
1322		BRIN/BPPT/LIPI	Irja1	CTD	19	0.316667	132.483	Pacific Ocean
1323		BRIN/BPPT/LIPI	Irja1	CTD	18	0.833333	132.483	Pacific Ocean
1324		BRIN/BPPT/LIPI	Irja1	CTD	17	1.33333	132.5	Pacific Ocean
1325		BRIN/BPPT/LIPI	Irja1	CTD	16	-0.666667	133.5	Pacific Ocean
1326		BRIN/BPPT/LIPI	Irja1	CTD	15	-0.166667	133.5	Pacific Ocean
1327		BRIN/BPPT/LIPI	Irja1	CTD	14	0.333333	133.483	Pacific Ocean
1328		BRIN/BPPT/LIPI	Irja1	CTD	13	0.85	133.483	Pacific Ocean
1329		BRIN/BPPT/LIPI	Irja1	CTD	12	1.33333	133.5	Pacific Ocean
1330		BRIN/BPPT/LIPI	Irja1	CTD	11	-1.66667	134.5	Pacific Ocean
1331		BRIN/BPPT/LIPI	Irja1	CTD	10	-1.15	134.483	Pacific Ocean
1332		BRIN/BPPT/LIPI	Irja1	CTD	9	-0.65	134.483	Pacific Ocean
1333		BRIN/BPPT/LIPI	Irja1	CTD	8	-0.15	134.483	Pacific Ocean
1334		BRIN/BPPT/LIPI	Irja1	CTD	7	0.316667	134.5	Pacific Ocean
1335		BRIN/BPPT/LIPI	Irja1	CTD	6	0.833333	134.483	Pacific Ocean
1336		BRIN/BPPT/LIPI	Irja1	CTD	5	1.33333	134.483	Pacific Ocean
1337		BRIN/BPPT/LIPI	Irja1	CTD	4	-0.166667	135.483	Pacific Ocean
1338		BRIN/BPPT/LIPI	Irja1	CTD	3	0.333333	135.483	Pacific Ocean
1339		BRIN/BPPT/LIPI	Irja1	CTD	2	0.816667	135.483	Pacific Ocean
1340		BRIN/BPPT/LIPI	Irja1	CTD	1	1.31667	135.483	Pacific Ocean
1341		BRIN/BPPT/LIPI	Irja2	CTD	40	-0.166667	135.5	Pacific Ocean
1342		BRIN/BPPT/LIPI	Irja2	CTD	39	0.333333	135.5	Pacific Ocean
1343		BRIN/BPPT/LIPI	Irja2	CTD	38	0.833333	135.5	Pacific Ocean
1344		BRIN/BPPT/LIPI	Irja2	CTD	37	1.31667	135.5	Pacific Ocean
1345		BRIN/BPPT/LIPI	Irja2	CTD	36	1.81667	135.5	Pacific Ocean
1346		BRIN/BPPT/LIPI	Irja2	CTD	35	2.33333	135.483	Pacific Ocean
1347		BRIN/BPPT/LIPI	Irja2	CTD	34	-1.66667	134.483	Pacific Ocean
1348		BRIN/BPPT/LIPI	Irja2	CTD	33	-1.16667	134.483	Pacific Ocean
1349		BRIN/BPPT/LIPI	Irja2	CTD	32	-0.665278	134.484	Pacific Ocean
1350		BRIN/BPPT/LIPI	Irja2	CTD	31	-0.166667	134.483	Pacific Ocean
1351		BRIN/BPPT/LIPI	Irja2	CTD	30	0.331667	134.499	Pacific Ocean
1352		BRIN/BPPT/LIPI	Irja2	CTD	28	1.33528	134.5	Pacific Ocean
1353		BRIN/BPPT/LIPI	Irja2	CTD	29	0.84	134.5	Pacific Ocean
1354		BRIN/BPPT/LIPI	Irja2	CTD	27	1.83333	134.483	Pacific Ocean
1355		BRIN/BPPT/LIPI	Irja2	CTD	26	2.32778	134.498	Pacific Ocean
1356		BRIN/BPPT/LIPI	Irja2	CTD	25	-0.668611	133.508	Pacific Ocean
1357		BRIN/BPPT/LIPI	Irja2	CTD	24	-0.167222	133.498	Pacific Ocean
1358		BRIN/BPPT/LIPI	Irja2	CTD	23	0.330556	133.498	Pacific Ocean
1359		BRIN/BPPT/LIPI	Irja2	CTD	22	0.834444	133.5	Pacific Ocean
1360		BRIN/BPPT/LIPI	Irja2	CTD	21	1.33333	133.483	Pacific Ocean
1361		BRIN/BPPT/LIPI	Irja2	CTD	20	1.83333	132.5	Pacific Ocean
1362		BRIN/BPPT/LIPI	Irja2	CTD	19	2.33528	133.501	Pacific Ocean
1363		BRIN/BPPT/LIPI	Irja2	CTD	18	-0.165278	132.5	Pacific Ocean
1364		BRIN/BPPT/LIPI	Irja2	CTD	17	0.332778	132.499	Pacific Ocean
1365		BRIN/BPPT/LIPI	Irja2	CTD	16	0.848333	132.501	Pacific Ocean
1366		BRIN/BPPT/LIPI	Irja2	CTD	15	1.33167	132.5	Pacific Ocean
1367		BRIN/BPPT/LIPI	Irja2	CTD	13	2.32806	132.499	Pacific Ocean
1368		BRIN/BPPT/LIPI	Irja2	CTD	12	-0.65	131.5	Pacific Ocean
1369		BRIN/BPPT/LIPI	Irja2	CTD	11	-0.156389	131.501	Pacific Ocean
1370		BRIN/BPPT/LIPI	Irja2	CTD	10	0.316667	131.483	Pacific Ocean
1371		BRIN/BPPT/LIPI	Irja2	CTD	9	0.833333	131.483	Pacific Ocean
1372		BRIN/BPPT/LIPI	Irja2	CTD	8	1.33333	131.5	Pacific Ocean
1373		BRIN/BPPT/LIPI	Irja2	CTD	6	2.33778	131.505	Pacific Ocean
1374		BRIN/BPPT/LIPI	Irja2	CTD	7	1.83333	131.483	Pacific Ocean
1375		BRIN/BPPT/LIPI	Post Satal	CTD	CTD03	-5.66897	122.68	NA
